# Supplementary material for: Comparative effectiveness of three versions of a stepped care model for insomnia differing in the amount of therapist support in internet-delivered treatment: study protocol for a pragmatic cluster randomised controlled trial (GET Sleep)
Source: PubMed Central journal article supplement — BMJ Open. 2022 Aug 3;12(8):e058212. doi: 10.1136/bmjopen-2021-058212 (PMC9353010; doi:10.1136/bmjopen-2021-058212), 2022-08-03
Supplement: bmjopen-2021-058212.draft_revisions.pdf [file bmjopen-2021-058212.draft_revisions.pdf]

# BMJ Open

BMJ Open is committed to open peer review. As part of this commitment we make the peer review history of every article we publish publicly available.

When an article is published we post the peer reviewers' comments and the authors' responses online. We also post the versions of the paper that were used during peer review. These are the versions that the peer review comments apply to.

The versions of the paper that follow are the versions that were submitted during the peer review process. They are not the versions of record or the final published versions. They should not be cited or distributed as the published version of this manuscript.

BMJ Open is an open access journal and the full, final, typeset and author-corrected version of record of the manuscript is available on our site with no access controls, subscription charges or pay-per-view fees (<http://bmjopen.bmj.com>).

If you have any questions on BMJ Open's open peer review process please email [info.bmjopen@bmj.com](mailto:info.bmjopen@bmj.com)

# BMJ Open

## Effectiveness of a stepped care model for insomnia – study protocol for a pragmatic cluster randomised controlled trial (GET Sleep)

|                               |                                                                                                                                                                                                                                                                                                                                                                                                                                                                                                                                                                                                                                                                                                                                                                                                                                                                                                                                                                                                                                                                                                                                                                                                                                                                                                                                                                                                                                                                                                                                                                                                                                                                                                                                                                                                                                                                                                                                                                                                                                                                                                                                                                                                                  |
|-------------------------------|------------------------------------------------------------------------------------------------------------------------------------------------------------------------------------------------------------------------------------------------------------------------------------------------------------------------------------------------------------------------------------------------------------------------------------------------------------------------------------------------------------------------------------------------------------------------------------------------------------------------------------------------------------------------------------------------------------------------------------------------------------------------------------------------------------------------------------------------------------------------------------------------------------------------------------------------------------------------------------------------------------------------------------------------------------------------------------------------------------------------------------------------------------------------------------------------------------------------------------------------------------------------------------------------------------------------------------------------------------------------------------------------------------------------------------------------------------------------------------------------------------------------------------------------------------------------------------------------------------------------------------------------------------------------------------------------------------------------------------------------------------------------------------------------------------------------------------------------------------------------------------------------------------------------------------------------------------------------------------------------------------------------------------------------------------------------------------------------------------------------------------------------------------------------------------------------------------------|
| Journal:                      | <i>BMJ Open</i>                                                                                                                                                                                                                                                                                                                                                                                                                                                                                                                                                                                                                                                                                                                                                                                                                                                                                                                                                                                                                                                                                                                                                                                                                                                                                                                                                                                                                                                                                                                                                                                                                                                                                                                                                                                                                                                                                                                                                                                                                                                                                                                                                                                                  |
| Manuscript ID                 | bmjopen-2021-058212                                                                                                                                                                                                                                                                                                                                                                                                                                                                                                                                                                                                                                                                                                                                                                                                                                                                                                                                                                                                                                                                                                                                                                                                                                                                                                                                                                                                                                                                                                                                                                                                                                                                                                                                                                                                                                                                                                                                                                                                                                                                                                                                                                                              |
| Article Type:                 | Protocol                                                                                                                                                                                                                                                                                                                                                                                                                                                                                                                                                                                                                                                                                                                                                                                                                                                                                                                                                                                                                                                                                                                                                                                                                                                                                                                                                                                                                                                                                                                                                                                                                                                                                                                                                                                                                                                                                                                                                                                                                                                                                                                                                                                                         |
| Date Submitted by the Author: | 22-Oct-2021                                                                                                                                                                                                                                                                                                                                                                                                                                                                                                                                                                                                                                                                                                                                                                                                                                                                                                                                                                                                                                                                                                                                                                                                                                                                                                                                                                                                                                                                                                                                                                                                                                                                                                                                                                                                                                                                                                                                                                                                                                                                                                                                                                                                      |
| Complete List of Authors:     | <p>Spiegelhalter, Kai; University Medical Center Freiburg, Psychiatry and Psychotherapy<br/>         Baumeister, Harald; Universitat Ulm, Institut of Psychology and Education, Department of Clinical Psychology and Psychotherapy;<br/>         Al-Kamaly, Abdulwahab; Medical Center - University of Freiburg<br/>         Bader, Martina; Ulm University<br/>         Bauereiss, Natalie; Ulm University<br/>         Benz, Fee; Freiburg University Hospital Clinic of Psychiatry and Psychotherapy<br/>         Braun, Lina; Ulm University, Clinical Psychology and Psychotherapy<br/>         Buntrock, Claudia; Friedrich-Alexander-Universitat Erlangen-Nurnberg, Clinical Psychology and Psychotherapy<br/>         Burkhardt, Maike; BARMER<br/>         Cuijpers, Pim; VU University Amsterdam, Department of Clinical Psychology<br/>         Domschke, Katharina; University of Freiburg, Center for Basics in Neuromodulation, Faculty of Medicine<br/>         Dülsen, Patrick; Ulm University<br/>         Franke, Marvin; GET.ON Institut für Online Gesundheitstrainings GmbH<br/>         Frase, Lukas; Freiburg University Hospital Clinic of Psychiatry and Psychotherapy<br/>         Heber, Elena; GET.ON Institut für Online Gesundheitstrainings GmbH<br/>         Helm, Kathrin; Medical Center – University of Freiburg<br/>         Jentsch, Terry; Freiburg University Hospital Clinic of Psychiatry and Psychotherapy<br/>         Johann, Anna; Freiburg University Hospital Clinic of Psychiatry and Psychotherapy<br/>         Küchler, Ann-Marie; Ulm University, Clinical Psychology and Psychotherapy<br/>         Kuhn, Michael; BARMER<br/>         Lehr, Dirk; Leuphana University Lueneburg, Department of Health Psychology and Applied Biological Psychology<br/>         Maun, Andy; University of Freiburg, Division of General Practice, Faculty of Medicine, Medical Center<br/>         Morin, Charles M.; Universite Laval Faculte de medecine,<br/>         Moshagen, Morten; Ulm University,<br/>         Richter, Knejinja; Klinikum Nurnberg, University Clinic for Psychiatry and Psychotherapy; University Goce Delcev, Faculty for medical sciences</p> |

1  
2  
3  
4  
5  
6  
7  
8  
9  
10  
11  
12  
13  
14  
15  
16  
17  
18  
19  
20  
21  
22  
23  
24  
25  
26  
27  
28  
29  
30  
31  
32  
33  
34  
35  
36  
37  
38  
39  
40  
41  
42  
43  
44  
45  
46  
47  
48  
49  
50  
51  
52  
53  
54  
55  
56  
57  
58  
59  
60

|           |                                                                                                                                                                                                                                                                                                                                                                                                                                                                |
|-----------|----------------------------------------------------------------------------------------------------------------------------------------------------------------------------------------------------------------------------------------------------------------------------------------------------------------------------------------------------------------------------------------------------------------------------------------------------------------|
|           | Schiel, Julian; Freiburg University Hospital Clinic of Psychiatry and Psychotherapy<br>Simon, Laura; Ulm University<br>Spille, Lukas; Freiburg University Hospital Clinic of Psychiatry and Psychotherapy<br>Weeß, Hans-Günter; Pfalzkrlinikum Klingenmünster<br>Riemann, Dieter; Freiburg University Hospital,<br>Ebert, David; Technical University of Munich, Department for Sport and Health Sciences, Chair for Psychology and Digital Mental Health Care |
| Keywords: | SLEEP MEDICINE, PSYCHIATRY, Adult psychiatry < PSYCHIATRY                                                                                                                                                                                                                                                                                                                                                                                                      |
|           |                                                                                                                                                                                                                                                                                                                                                                                                                                                                |

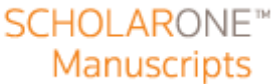

## Effectiveness of a stepped care model for insomnia – study protocol for a pragmatic cluster randomised controlled trial (GET Sleep)

Spiegelhalder K<sup>1\*</sup>, Baumeister H<sup>2\*</sup>, Al-Kamaly A<sup>3</sup>, Bader M<sup>4</sup>, Bauereiß N<sup>2</sup>, Benz F<sup>1</sup>,  
Braun L<sup>2</sup>, Buntrock C<sup>5</sup>, Burkhardt M<sup>6</sup>, Cuijpers P<sup>7</sup>, Domschke K<sup>1</sup>, Dülsen P<sup>2</sup>, Franke M<sup>5,8</sup>,  
Fraser L<sup>1</sup>, Heber E<sup>8</sup>, Helm K<sup>3</sup>, Jentsch T<sup>1</sup>, Johann AF<sup>1,9</sup>, Kuchler AM<sup>2</sup>, Kuhn M<sup>6</sup>, Lehr D<sup>10</sup>,  
Maun A<sup>3</sup>, Morin CM<sup>11</sup>, Moshagen M<sup>4</sup>, Richter K<sup>12,13</sup>, Schiel JE<sup>1</sup>, Simon L<sup>2</sup>, Spille L<sup>1</sup>, Weeß  
HG<sup>14</sup>, Riemann D<sup>1\*</sup>, Ebert DD<sup>8,15\*</sup>

- 1 Department of Psychiatry and Psychotherapy, Medical Center – University of Freiburg, Faculty of Medicine, University of Freiburg, Germany
- 2 Department of Clinical Psychology and Psychotherapy, Institute of Psychology and Education, Ulm University, Ulm, Germany
- 3 Department of Medicine, Institute of General Practice/ Family Medicine, Medical Center - University of Freiburg, Faculty of Medicine, University of Freiburg, Germany
- 4 Department of Psychological Research Methods, Institute of Psychology and Education, Ulm University, Ulm, Germany
- 5 Department of Clinical Psychology and Psychotherapy, Friedrich-Alexander University Erlangen-Nürnberg, Erlangen, Germany
- 6 BARMER, Schwäbisch-Gmünd, BARMER
- 7 Department of Clinical, Neuro and Developmental Psychology, Amsterdam Public Health research institute, Vrije Universiteit Amsterdam, Amsterdam, The Netherlands
- 8 GET.ON Institut für Online Gesundheitstrainings GmbH (operating under the registered brand “HelloBetter”), Hamburg, Germany
- 9 Medical Psychology and Medical Sociology, Faculty of Medicine, University of Freiburg, Germany
- 10 Department of Health Psychology and Applied Biological Psychology, Institute of Psychology, Leuphana University of Lueneburg, Lueneburg, Germany.
- 11 École de psychologie, Université Laval, Québec, Québec, Canada.
- 12 University Clinic for Psychiatry and Psychotherapy, Paracelsus Medical University, Nuremberg, Germany
- 13 Faculty for Social Work, Technical University Nuremberg Georg Simon Ohm, Nuremberg, Germany
- 14 Interdisciplinary Center of Sleep, Pfalzkrankenhaus, Klinikum für Psychiatrie und Neurologie AdöR, Klingenmünster, Germany.
- 15 Department of Sport and Health Sciences, Technical University of Munich, Munich, Germany.

\* These authors contributed equally (Spiegelhalder, Baumeister, Riemann, Ebert)

**Keywords:** Insomnia; Sleep Initiation and Maintenance Disorders; Internet-Based Intervention; Randomised Controlled Trial

**Word count:** 4513 words

**Address for correspondence:**

Kai Spiegelhalder, MD PhD  
Department of Psychiatry and Psychotherapy  
Medical Center – University of Freiburg  
Hauptstraße 5, 79104 Freiburg, Germany  
Tel: +49 761 270 69780  
Fax: +49 761 270 66190  
Email: Kai.Spiegelhalder@uniklinik-freiburg.de

### **Conflict of interest statement**

H. Baumeister received consultancy fees, reimbursement of congress attendance and travel costs as well as payments for lectures from Psychotherapy and Psychiatry Associations as well as Psychotherapy Training Institutes in the context of E-Mental-Health topics. He has been the beneficiary of study support (third-party funding) from several public funding organizations. M. Burkhardt and M. Kuhn are employees of BARMER. K. Domschke is a member of the Janssen Pharmaceuticals Inc. "Steering Committee Neuroscience". M. Franke, E. Heber, D. Lehr and D. D. Ebert are stakeholders of the GET.ON Institut für Online Gesundheitstrainings GmbH (operating under the registered brand "HelloBetter"), which aims to implement scientific findings related to digital health interventions into routine care. HelloBetter distributes the digital intervention for insomnia that is used in this study. C. M. Morin received research grant from Canopy Health, Eisai, Idorsia, and Lallemand Health Solutions; he served as consultant to Eisai, Idorsia, Pear Therapeutics, Sunovion and Weight Watchers, and received royalties from Mapi Research Trust. D. D. Ebert has served as a consultant to/on the scientific advisory boards of Sanofi, Novartis, Minddistrict, Lantern, Schoen Kliniken, Ideamed, German health insurance companies (BARMER, Techniker Krankenkasse) and a number of federal chambers for psychotherapy. None of the other authors declare any conflict of interest.

## Abstract

**Introduction:** It is unclear how internet-delivered cognitive behavioural therapy for insomnia (CBT-I) can be integrated into healthcare systems, and little is known about the optimal level of therapist guidance. The aim of this study is to investigate three different versions of a stepped care model for insomnia (IG1, IG2, IG3) versus treatment-as-usual (TAU). IG1, IG2, and IG3 rely on treatment by general practitioners (GPs) in the entry level and differ in the amount of therapist guidance in internet-delivered CBT-I.

**Methods and analysis:** In this randomised controlled trial, 4,268 patients meeting ICD-10 criteria for insomnia will be recruited. The study will use cluster randomisation of GPs with an allocation ratio of 3:3:3:1 (IG1, IG2, IG3, TAU). In step 1 of the stepped care model, GPs will deliver psychoeducational treatment; in step 2, an internet-delivered CBT-I program will be used; in step 3, GPs will refer patients to specialised treatment. Outcomes will be collected at baseline, and 4 weeks, 12 weeks and 6 months after baseline assessment. The primary outcome is insomnia severity at 6 months. An economic evaluation will be conducted and qualitative interviews will be used to explore barriers and facilitators of the stepped care model.

**Ethics and dissemination:** The study protocol was approved by the Ethics Committee of the Medical Center – University of Freiburg. The results of the study will be published irrespective of the outcome.

**Registration details:** The study has been registered in the German Clinical Trials Register ([https://www.drks.de/drks\\_web/](https://www.drks.de/drks_web/); DRKS00021503).

### Strength and limitations of the study

- This randomised controlled trial will recruit 4,268 patients and will be the largest clinical trial on insomnia.
- This trial will investigate three different versions of a stepped care model for insomnia which rely on treatment by general practitioners in the entry level and differ in the amount of therapist guidance in internet-delivered CBT-I.
- The primary outcome is insomnia severity. An economic evaluation will be conducted and qualitative interviews will be used to explore barriers and facilitators of the stepped care model.
- Patients with insomnia will not be blind to treatment allocation in this trial.

## 1. Introduction

Insomnia disorder is characterised by difficulties initiating and/or maintaining sleep resulting in significant daytime dysfunction.<sup>1</sup> In Western industrialised countries, 5-10% of the general population<sup>2</sup> and 20% of primary care patients<sup>3</sup> suffer from the disorder. Insomnia is associated with a reduced quality of life,<sup>4</sup> and is a risk factor for other mental disorders, in particular depression and anxiety disorders,<sup>5</sup> as well as for cardiovascular diseases.<sup>6,7</sup>

Clinical guidelines recommend cognitive behavioural therapy for insomnia (CBT-I) as first-line treatment.<sup>8-9</sup> CBT-I is a multi-component intervention consisting of psychoeducation, relaxation therapy, sleep restriction therapy, stimulus control therapy, and cognitive therapy. However, only a small proportion of patients with insomnia has access to this treatment. For example, data from BARMER, a large German public health insurance, indicate that around 1.6% of the insured persons received a diagnosis of insomnia in 2017, but only 10% of these patients received a psychotherapeutic treatment.<sup>10</sup> Assuming a prevalence of insomnia of 5.7% in Germany,<sup>11</sup> this suggests that only 2.8% of all insomnia patients in Germany receive psychotherapeutic treatment. Since cognitive-behavioural therapy is not the only form of psychotherapy reimbursed by German health insurances and the focus of the psychotherapeutic treatment may, in many patients, be a comorbid disorder rather than insomnia, the assumption that 1% of all insomnia patients receive CBT-I might already be a very optimistic estimation. Instead, many insomnia patients are treated with benzodiazepine receptor agonists or sedating antidepressants on a long-term basis,<sup>12</sup> which is potentially harmful and not recommended by clinical guidelines.<sup>8,9</sup> This situation is unfortunate both from a clinical and from a health-economic perspective. Insomnia is associated with estimated annual costs of about 5,900 Euros per person in Germany due to absenteeism and presenteeism.<sup>13</sup> Thus, given its prevalence, a reasonable estimate of the indirect costs of insomnia in Germany is 25 billion Euros per year. This number is broadly in line with previously published socioeconomic data from the United States<sup>14</sup> and Canada.<sup>15</sup>



1  
2  
3 The dissemination of CBT-I is a major healthcare challenge, and internet-delivered  
4 psychotherapy has been suggested as a possible mean to lower the treatment gap.<sup>16</sup>  
5  
6 Compared to face-to-face treatment, main advantages of internet-delivered CBT-I are  
7 convenience, increased accessibility, and potentially lower costs. In particular, internet  
8 interventions are easily accessible anytime and anywhere. Patients do not incur travelling  
9 expenses; they can work at their own pace; they may provide more honest answers in the  
10 privacy of their own home; and barriers related to the stigma of mental disorders may be  
11 reduced.<sup>17</sup> Hence, offering internet-delivered CBT-I might increase the utilisation of  
12 psychotherapy in undertreated populations. Meta-analyses suggest that internet-delivered  
13 CBT-I is highly effective in comparison to waitlist control conditions,<sup>18 19</sup> and that the effects  
14 appear to be comparable in size to those of face-to-face CBT-I.<sup>20</sup> In addition, follow-up data  
15 of up to 3 years demonstrate a high long-term effectiveness of online CBT-I.<sup>21 22</sup>

26  
27  
28  
29 However, at least two questions with a high degree of healthcare relevance remain to be  
30 answered. First, it is unclear how internet-delivered CBT-I can be effectively integrated into  
31 existing healthcare systems that rely on general practitioners (GPs) to take the lead in  
32 coordinating patient care. Previous research has shown that the implementation of CBT-I  
33 techniques in primary care is challenging but promising.<sup>23 24</sup> In line with a stepped care  
34 approach to the treatment of insomnia,<sup>25</sup> GPs may serve as the entry level of a multistep  
35 model that offers more intense support for those with more complicated complaints in a cost-  
36 effective way. Although conceptually appealing, there are very few studies investigating such  
37 stepped care models for insomnia,<sup>26-28</sup> and none of them included active treatment provided  
38 by GPs. Second, little is known about the optimal level of therapist guidance in the context of  
39 internet-delivered CBT-I. While it is generally thought that human support has positive effects  
40 on adherence and efficacy in online mental health interventions,<sup>29</sup> many studies in the  
41 insomnia field have successfully implemented online interventions without any human  
42 support/ guidance (e.g.,<sup>16 22 30 31</sup>). One study has directly compared an online intervention for  
43 insomnia with and without guidance via email and found a superior efficacy in the guided  
44  
45  
46  
47  
48  
49  
50  
51  
52  
53  
54  
55  
56  
57  
58  
59  
60

09.10.2021, version 1.0, Spiegelhalter et al. 7

1  
2  
3 group.<sup>32</sup> However, there is limited knowledge about who needs and who does not need  
4  
5 guidance and how this translates into cost-effectiveness estimates.  
6  
7

8 The central objective of the present study is to improve the quality and efficiency of  
9  
10 healthcare for patients with insomnia. In addition, it is intended to improve interdisciplinary  
11  
12 and intersectoral cooperation between GPs, psychotherapists and medical specialists  
13  
14 working in outpatient and inpatient settings. Three different versions of a stepped care model  
15  
16 (intervention group 1, IG1; intervention group 2, IG2; intervention group 3, IG3) that differ in  
17  
18 the amount of therapist guidance that is provided in the internet-delivered intervention in step  
19  
20 2 will be compared with treatment-as-usual (TAU) in, to the best of our knowledge, the  
21  
22 largest clinical trial to date on insomnia (see Fig. 1). At step 1, participating GPs will provide  
23  
24 a brief psychoeducational treatment; at step 2, patients will receive an internet intervention  
25  
26 based on CBT-I; and at step 3, patients will be referred to specialised medical face-to-face  
27  
28 treatment. Patients who are unresponsive to the treatment at one step will proceed to the  
29  
30 next step of the model. The primary research question is the effectiveness of the  
31  
32 interventions. We will also investigate differential treatment outcomes in four subgroups of  
33  
34 patients: 1) insomnia without any comorbidity; 2) insomnia with mental comorbidity; 3)  
35  
36 insomnia with somatic comorbidity; 4) insomnia with mental and somatic comorbidity. In  
37  
38 addition, an economic evaluation will be carried out and qualitative interviews will be  
39  
40 conducted to explore barriers and facilitators of the stepped care model. In case of a positive  
41  
42 evaluation, it is intended to include the stepped care model in the guidelines of the Federal  
43  
44 Joint Committee, the highest decision-making body of the joint self-government of  
45  
46 physicians, dentists, hospitals, and health insurance funds in Germany.  
47  
48  
49

50  
51 (please insert Figure 1 here)  
52  
53  
54  
55  
56  
57  
58  
59  
60

## 2. Methods

### 2.1. Study design

The study is a four-armed pragmatic parallel-group cluster-randomised controlled trial investigating three different versions of a stepped care model for insomnia versus TAU. The unit of randomisation will be the participating GPs to avoid treatment diffusion. Primary and secondary outcomes as well as moderating and mediating variables and intervention-related variables will be assessed online by patient self-report using LimeSurvey (<https://www.limesurvey.org/>). Online assessments will take place at baseline (T0) and after 4 (T1) and 12 (T2) weeks, as well as 6 months after baseline (T3; see Fig. 2 for trial design). Informed consent will also be given online. The trial might be continued with further annual follow-up assessments after 1-5 years in case of patients' informed consent and dependent on follow-up assessment resources beyond the funded 6 months follow-up.

The study has been registered in the German Clinical Trials Register ([https://www.drks.de/drks\\_web/](https://www.drks.de/drks_web/); DRKS00021503) and will be conducted in accordance with the Declaration of Helsinki. The study protocol was approved by both the Ethics Committee of the Medical Center – University of Freiburg and the Ethics Committee of the State Chamber of Physicians ('Landesärztekammer Baden-Württemberg'). In addition, the data protection officers of the Medical Center – University of Freiburg and Ulm University have approved the formal data protection concept of this study.

The study will be reported in accordance with the Consolidated Standards of Reporting Trials (CONSORT) Statement 2010 and the extensions for reporting pragmatic trials, noninferiority trials, cluster randomised trials, multi-arm parallel group trials and trials on psychological interventions.<sup>33-38</sup> This trial protocol was created according to SPIRIT guidelines.<sup>39</sup>

(please insert Figure 2 here)

## 2.2. Participants

Overall, 4,268 patients are planned to be recruited. The inclusion criteria are: a) age  $\geq$  18 years; and b) ICD-10 diagnosis of non-organic insomnia (F51.0) or insomnia (G47.0). Exclusion criteria are: a) untreated sleep apnoea syndrome (ICD-10: G47.3); b) untreated restless legs syndrome or periodic leg movement disorder (ICD-10: G25.8); c) untreated hyperthyroidism (ICD-10: E05.9); d) ongoing psychotherapy for insomnia; e) conditions that may be aggravated by CBT-I (bipolar disorder, ICD-10: F31.x; epilepsy, ICD-10: G40.x); e) conditions that pose a serious threat to treatment adherence (e.g., organic, including symptomatic, mental disorders (ICD-10: F00-F09); mental and behavioural disorders due to psychoactive substance use (ICD-10: F10-F19); schizophrenia, schizotypal and delusional disorders (ICD-10: F20-F29)); f) acute suicidality.

Up to 320 GPs from Bavaria and Baden-Wuerttemberg, who participate in this study, will recruit eligible patients during consultations. In addition, online, print and broadcast media advertisements as well as postal mailings by the BARMER to potential patients will be used to recruit insomnia patients from all over Germany. These patients will be referred to a group of GPs that use telehealth consultations for checking inclusion and exclusion criteria, delivering step 1 of the stepped care model and guiding patients through the stepped care model. All GPs will receive remuneration for each participating patient (up to 158.25€ depending on the number of consultations). In addition to receiving free access to the stepped care model or TAU, participants will receive payment at completion of online assessments T1 (15€), T2 (15€), and T3 (20€) to increase adherence.

## 2.3. Randomisation and allocation concealment

This study will use cluster randomisation of GPs with an allocation ratio of 3:3:3:1 (IG1:IG2:IG3:TAU). Randomisation will be performed by authors MB and MM (Ulm University) who are not otherwise involved in the trial and therefore blinded to all processes

1  
2  
3 of the study. Population-density stratified permuted block randomisation (nine strata based  
4 on population density and average level of income, one stratum for GPs that exclusively  
5 employ telehealth consultations) will be employed with varying block sizes concealed to the  
6 investigators to minimise selection bias. GPs from community practices will be randomised  
7 into the same trial arm. The GPs are instructed to conceal group allocation until the baseline  
8 assessment is completed by the patient.  
9  
10  
11  
12  
13  
14  
15  
16  
17  
18  
19

## 20 **2.4. Blinding**

21  
22 Blinding of patients and healthcare providers is not feasible. However, screenings and  
23 baseline assessments will be performed before patients are informed about treatment  
24 assignment to avoid contamination with anticipated treatment effects. In case of non-  
25 completion of assessments participants will receive fully automated standardised reminders.  
26  
27 Data analysts are blinded with respect to group allocation and outcomes.  
28  
29  
30  
31  
32  
33  
34  
35  
36

## 37 **2.5. Intervention**

38  
39 The stepped care model that will be tested in the current study is presented in Figure 1.  
40  
41  
42  
43  
44

### 45 **2.5.1. Step 1**

46  
47  
48 In step 1 of the stepped care model, the responsible GP will deliver a brief standardised  
49 psychoeducational treatment after being trained by sleep medicine specialists of the  
50 Department of Psychiatry and Psychotherapy of the Medical Center – University of Freiburg  
51 and by primary care physicians of the Department of Medicine, Division of General Practice,  
52 of the Medical Center – University of Freiburg. The treatment includes the following  
53 psychoeducational recommendations: a) avoid alcohol as a hypnotic; b) avoid clock-watching  
54 at night; c) avoid afternoon caffeine use; d) exercise regularly. In addition, the following  
55  
56  
57  
58  
59  
60

1  
2  
3 stimulus control instructions will be given by the GPs: a) use the bed only for sleep and  
4 sexual activity; b) get out of bed when unable to sleep; c) do not nap during the day. GPs can  
5 also consult a psychiatrist of the Department of Psychiatry and Psychotherapy of the Medical  
6 Center – University of Freiburg whenever they feel that discontinuation of hypnotic  
7 medication would be appropriate. After four weeks, patients will be given the opportunity to  
8 access step 2 of the stepped care model. Importantly, for each patient, GPs can decide to  
9 skip step 1 of the stepped care model if they do not expect a substantial impact on insomnia  
10 severity.  
11  
12  
13  
14  
15  
16  
17  
18  
19  
20  
21  
22

### 23 **2.5.2. Step 2**

24  
25  
26 At step 2 of the stepped care model, the GET.ON Institut für Online Gesundheitstrainings  
27 GmbH (operating under the registered brand “HelloBetter”) will provide an internet  
28 intervention based on CBT-I with an accompanying mobile sleep diary app. The intervention  
29 was initially developed at Leuphana University Lüneburg by the team of author DL and was  
30 positively evaluated in three randomised controlled trials.<sup>40-42</sup> Since the intervention was  
31 initially designed for workers, it has been adapted and technically updated for the current  
32 study by HelloBetter to meet the needs of all potential patients. Treatment content is based  
33 on CBT-I manuals and includes psychoeducation, relaxation therapy, sleep restriction  
34 therapy, stimulus control therapy, and cognitive interventions targeting rumination and worry.  
35 Delivery is structured into eight sessions, lasting approximately 45-60 min each.  
36  
37  
38  
39  
40  
41  
42  
43  
44  
45  
46  
47

48 All patients receive an initial and a final consultation with one of a team of e-coaches of  
49 HelloBetter, who are trained and supervised psychologists. The consultations will be  
50 conducted by telephone, or, if this is not possible, by in-platform messages. In addition to the  
51 initial and final consultation, patients randomised to the ‘standard’ version of the intervention  
52 (IG1) receive written feedback and support by the responsible e-coach after each session.  
53 E-coaches are instructed to spend, on average, 25 min per session for writing this feedback.  
54 Patients randomised to the ‘flex’ version of the intervention (IG2) receive written on-demand  
55  
56  
57  
58  
59  
60

1  
2  
3 support by the responsible e-coach. Patients randomised to the 'basic' version of the  
4  
5 intervention (IG3) do not receive additional human guidance.  
6  
7

8 The treatment platform operates according to the ISO 27000 and NEN 7510 standards. All  
9  
10 data is securely stored on ISO 27000-certified servers and transmitted via HTTPS with SSL  
11  
12 certificates (AES-256 and SHA-1, 2048-bit RSA). Unauthorised access to the platform is not  
13  
14 possible.  
15  
16

### 17 18 19 20 **2.5.3. Step 3** 21

22  
23 In step 3 of the stepped care model, non-responders will be referred by their GPs to  
24  
25 specialised medical treatment. The decision about this referral lies with the responsible GP  
26  
27 and is based on clinical judgement of response. However, the responsible e-coach of  
28  
29 HelloBetter will make a recommendation to the GP about whether and by whom the  
30  
31 treatment should be continued after step 2. As a rule of thumb, GPs are recommended to  
32  
33 refer patients with an ISI score  $\geq 15$  and a comorbid mental health syndrome to a psychiatrist  
34  
35 and/or a psychotherapist in step 3, and all other patients with an ISI score  $\geq 15$  to a sleep  
36  
37 medicine specialist.  
38  
39  
40  
41  
42  
43

## 44 **2.6. Safety protocol** 45

46  
47 During the screening procedure, GPs exclude patients with acute suicidality. Suicidal  
48  
49 ideation will also be screened by the e-coaches of HelloBetter at their initial consultations,  
50  
51 and at T0, T1, T2, and T3 using QIDS-SR16 and NEQ (see paragraph on measures for  
52  
53 details). Reports of current suicidal ideation in the interview, a score  $\geq 1$  on the suicide item of  
54  
55 the QIDS-SR16 (item 12; 0 = "I do not think of suicide or death.", 1 = "I feel that life is empty  
56  
57 or wonder if it's worth living.", 2 = "I think of suicide or death several times a week for several  
58  
59 minutes", 3 = "I think of suicide or death several times a day in some detail, or I have made  
60

09.10.2021, version 1.0, Spiegelhalter et al. 13

specific plans for suicide or have actually tried to take my life”), or the answer „yes“ to item 10 of the NEQ (“I got thoughts that it would be better if I did not exist anymore and that I should take my own life“) will result in a standardised safety protocol. In particular, participants will receive an information document with detailed information on available health services and the advice to consult their GP. The wording of the online information document is adapted in emphasis, depending on the severity of the indicated suicidality.

## 2.7. Measures

Table 1 presents an overview of measures that are assessed in this trial.

(please insert Table 1 here)

### 2.7.1. Primary outcome measure

The primary outcome will be insomnia severity at T3, six months after the baseline assessment. Insomnia severity will be assessed with the Insomnia Severity Index (ISI<sup>43</sup>). The ISI is composed of seven 5-point Likert scale items (0-4 points; total score range: 0-28 points) probing perceived severity of insomnia symptoms during the preceding two weeks. Several studies have shown good internal consistency of the ISI with Cronbach’s Alpha ranging from 0.70 to 0.90.<sup>43-45</sup>

### 2.7.2. Secondary outcome measures

Sleep quality will be assessed using the Pittsburgh Sleep Quality Index (PSQI<sup>46</sup>), a 19-item self-report measure covering different aspects of sleep quality. The total score of the PSQI ranges from 0 to 21, internal consistency was found to be 0.80.<sup>47</sup> Quality of life will be assessed with the AQoL-8D,<sup>48</sup> an instrument composed of 35 items that measure eight



1  
2  
3 dimensions (independent living, pain, senses, mental health, happiness, coping,  
4 relationships, self-worth). The AQoL-8D generates patient preference-based utilities on a  
5 scale of 0 (death) to 1 (perfect health), using the time-trade-off method,<sup>48</sup> which will be used  
6 to estimate quality-adjusted life years (QALYs) based on the area-under-the-curve (AUC)  
7 method. The AQoL-8D has been reported to have excellent internal consistency with a  
8 Cronbach's Alpha of 0.96.<sup>48</sup> Depressive symptoms will be measured using the 16-item Quick  
9 Inventory of Depressive Symptoms in the self-report format (QIDS-SR16<sup>49</sup>). The total score  
10 of the QIDS-SR16 ranges from 0 to 27, internal consistency was reported to be good  
11 (Cronbach's Alpha = 0.86).<sup>50</sup> Incident depression will be assessed in patients without a  
12 depression diagnosis at T0 and defined using a cut-off score of  $\geq 13$  on the QIDS-SR16.<sup>51</sup>  
13 Anxiety symptoms will be assessed with the 7-item General Anxiety Disorder 7 questionnaire  
14 (GAD-7<sup>52</sup>; total score 0-21; Cronbach's Alpha = 0.89<sup>53</sup>). Somatic symptoms will be measured  
15 using the 8-item Somatic Symptom Scale 8 (SSS-8<sup>54</sup>; total score 0-32; Cronbach's  
16 Alpha = 0.81). For the health-economic evaluation, health-care utilisation, patient and family  
17 expenditures and productivity losses due to absence from work or reduced efficiency during  
18 paid and unpaid work will be established with the Trimbos/iMTA questionnaire for costs  
19 associated with psychiatric illness (TiC-P), a retrospective self-report questionnaire covering  
20 the previous three months.<sup>55-57</sup> A list of unit cost prices will be used to compute health care  
21 costs on a per-participant basis.<sup>58</sup> Test-retest reliability has previously been shown to be  
22 satisfactory.<sup>56</sup>

### 2.7.3. Intervention-related variables

23  
24  
25  
26  
27  
28  
29  
30  
31  
32  
33  
34  
35  
36  
37  
38  
39  
40  
41  
42  
43  
44  
45  
46  
47  
48  
49  
50  
51 At T2 after 12 weeks, the 12-item Working Alliance Inventory for guided Internet interventions  
52 (WAI-I<sup>59</sup>) and the 12-item Technological Alliance Inventory (TAI-OT) will be administered in  
53 all patients of the intervention groups (IG1, IG2, IG3) who entered step 2 of the stepped care  
54 model (internet-delivered CBT-I). The WAI-I and the TAI-OT will be used to assess the  
55 therapeutic alliance between patient and e-coach and the technological alliance between  
56  
57  
58  
59  
60

09.10.2021, version 1.0, Spiegelhalter et al. 15

1  
2  
3 patient and e-coach and the technological alliance between client and the internet-based  
4 intervention, respectively. The WAI-I score ranges from 12 to 60 and the questionnaire has  
5 excellent internal consistency with a Cronbach's Alpha of 0.93.<sup>59</sup> The TAI-OT is a new self-  
6 report questionnaire developed by Labpsitec at Jaume I University in Castellón, Spain  
7 (Labpsitec (<http://www.labpsitec.uji.es/eng/index.php>) and measures the degree to which the  
8 internet-based intervention is perceived as being helpful in achieving therapeutic goals. The  
9 TAI-OT score ranges from 12 to 84. Patients in all conditions will receive the 8-item Client  
10 Satisfaction Questionnaire (CSQ-8<sup>60 61</sup>; total score 8-32), which is characterised by excellent  
11 internal consistency with a Cronbach's Alpha of 0.93.<sup>60</sup> In addition, the 20-item Negative  
12 Effects Questionnaire (NEQ<sup>62</sup>) will be used in all patients. The NEQ measures the frequency,  
13 with a total score ranging from 0 to 20, and impact, with a total score ranging from 0 to 80, of  
14 possible negative effects during treatment. Its internal consistency was found to be excellent  
15 with a Cronbach's Alpha of 0.95.<sup>62</sup> Moreover, an additional self-developed 24-item  
16 Questionnaire on adverse effects of CBT-I will be used. For adverse events reported in the  
17 NEQ and the additional self-developed 24-item questionnaire, patients who entered step 2 of  
18 the stepped care model will be asked if they attribute the adverse events to the behavioural  
19 components of CBT-I. A self-developed Dropout Questionnaire based on the Health Action  
20 Process Approach (HAPA<sup>63</sup>) will be used at T2 to identify dropout reasons in participants not  
21 completing at least 80% of the internet-delivered intervention. For a comprehensive  
22 evaluation of the implementation of the stepped care model a battery of self-developed self-  
23 report items will be used in all patients to assess the usage of and adherence to treatment  
24 components across the steps.  
25  
26  
27  
28  
29  
30  
31  
32  
33  
34  
35  
36  
37  
38  
39  
40  
41  
42  
43  
44  
45  
46  
47  
48  
49  
50  
51  
52

#### 53 **2.7.4. Potential treatment moderators and mediators**

54  
55  
56 At T0, demographic variables (e.g., age, gender), depressive and anxiety symptoms, as well  
57 as IT knowledge will be documented as potential moderators of treatment effectiveness. In  
58 addition, the baseline values of the following variables will be assessed as potential  
59  
60

1  
2  
3 moderators: the 10-item Dysfunctional Beliefs and Attitudes about Sleep Scale  
4 (DBAS-10<sup>64 65</sup>; Cronbach's Alpha = 0.69), the 16-item Pre-Sleep Arousal Scale (PSAS<sup>66 67</sup>;  
5 Cronbach's Alpha = 0.80-0.94), the 10-item Brief Fatigue Inventory (BFI<sup>68</sup>; Cronbach's Alpha  
6 = 0.96), the 10-item Perceived Stress Scale (PSS<sup>69</sup>; Cronbach's Alpha = 0.78), the 13-item  
7 Sleep Hygiene Index (SHI<sup>70</sup>; Cronbach's Alpha = 0.66), and the 18-item short version of the  
8 Cognitive Emotion Regulation Questionnaire (CERQ-short<sup>71</sup>; Cronbach's Alpha = 0.68-0.81).  
9 In addition, mediation analyses will be conducted using some of the constructs described in  
10 this section (DBAS-10, PSAS, PSS, SHI, CERQ) as well as two intervention-related variables  
11 described above (WAI-I, TAI-OT).  
12  
13  
14  
15  
16  
17  
18  
19  
20  
21  
22  
23  
24  
25

### 26 **2.7.5. Other data**

27  
28 Medical record data (e.g., ICD-10 diagnosis codes, treatment) will be provided by the GPs to  
29 enable allocation of patients to the four subgroups. In cases of missing medical record data,  
30 group allocation will be based on self-reported mental and somatic comorbidities. Sleep diary  
31 data will be assessed in step 2 of the stepped care model and will be used to evaluate  
32 treatment adherence, e.g., adherence to personalised sleep restriction recommendations.  
33 Additionally, usage data from the treatment platform will be used to assess adherence to the  
34 internet-delivered intervention. Secondary data from BARMER will be used to assess the  
35 validity of the TiC-P. In addition, qualitative interviews will be conducted with a subgroup of  
36 patients, GPs and e-coaches to assess their experience of positive and negative aspects of  
37 the stepped care model. Trained interviewers will explore acceptance, usage behaviour,  
38 barriers, and facilitators as well as side-effects of the stepped care model. The sample size  
39 and composition will be planned to consider the different intervention groups and gain  
40 sufficient theoretical data saturation. All subgroups will be represented in the interviews.  
41  
42  
43  
44  
45  
46  
47  
48  
49  
50  
51  
52  
53  
54  
55  
56  
57  
58  
59  
60

## 2.8. Sample size calculation

There is no universally accepted minimally important difference for the treatment of insomnia. Hence, this issue has been discussed among the clinicians involved in the current trial who are nationally and internationally leading experts in the field of insomnia research. Most clinicians agreed that 1.5 or more points on the ISI (exhibiting a common standard deviation of 6.0 points) are a reasonable minimally important difference corresponding to a minimally important effect size of  $d = 0.25$ . Based on previous research, it is assumed that all intervention groups (IG1, IG2, IG3) exhibit a considerably larger difference to the TAU group of at least  $d = 0.50$  (e.g.,<sup>24</sup>). Because of this, for ethical reasons and to reduce costs, the GPs are randomised with an allocation ratio of 3:3:3:1 (IG1, IG2, IG3, TAU), which ensures sufficient power for both differences between any IG and TAU (of at least  $d = 0.35$ ) as well for differences between IGs (of at least  $d = 0.25$ ). Based on 320 GPs with a median recruitment rate of  $n = 9 \pm 14$  patients, an ICC of 0.02, a correlation of the outcome at T3 with the corresponding baseline assessment of  $r = 0.5$ ,  $d = 0.25$ , an  $\alpha$  of 0.05 and  $(1-\beta)$  of 80%, the required sample size is  $n = 1,067$  for each of the four subgroups of patients (IGs:  $n = 320$  each; TAU:  $n = 107$ ). Thus, a total sample size of  $N = 4,268$  (IGs:  $n = 1,280$  each; TAU:  $n = 428$ ) is required. Sampling procedures for the qualitative interviews follow theoretical data saturation principles.<sup>72 73</sup>

## 2.9. Statistical analysis

Descriptive statistics of recruitment and dropout as well as baseline characteristics for each group will be provided. The primary effectiveness analysis will be conducted according to the intention-to-treat principle based on all patients with their original treatment allocation. Additionally, per-protocol analyses based on the data of patients who completed a substantial proportion of the internet intervention (i.e., 80% of the modules) will be conducted. Missing data will be handled via multiple imputation, using a multilevel imputation model to account for clustering. The effect of group allocation (IG1, IG2, IG3, TAU) on the

1  
2  
3 primary endpoint ISI at T3 (6 months after baseline) will be tested within a linear mixed  
4 model with corresponding 95% confidence intervals. All models will include the responsible  
5 GP as a clustering variable. Clinical significance as well as reliable reduction in insomnia  
6 severity will be determined using Number Needed to Treat (NNT) analyses<sup>74</sup> as well as the  
7 Reliable Change Index (RCI) by Jacobson & Truax<sup>75</sup>. Based on the RCI, participants will be  
8 categorised into responders and non-responders, and the proportion of responders will be  
9 compared between study groups (again accounting for clustering). Secondary outcomes will  
10 be analysed analogously to the primary outcome, using random effect regression models as  
11 appropriate for the respective type of data. Potential onset and remission of incident  
12 depression will be compared between study groups based on incidence rate ratios (IRR)  
13 using multilevel Poisson regression. No interim analysis is planned for effectiveness or  
14 futility. Exploratory moderator analyses will be used to investigate whether pre-treatment  
15 patient characteristics are associated with differential treatment effectiveness. Potential  
16 moderators include sociodemographic (e.g., age) and clinical (e.g., insomnia severity)  
17 variables. Exploratory mediator analyses will be employed to examine potential mechanisms  
18 of change. Among potential mediators are sleep-related (e. g. dysfunctional beliefs and  
19 attitudes about sleep) and intervention-related variables (e. g. working alliance).

20  
21  
22  
23  
24  
25  
26  
27  
28  
29  
30  
31  
32  
33  
34  
35  
36  
37  
38  
39  
40 The economic evaluation will be performed from the societal and public health care  
41 perspective. Two multilevel models (MLMs) will be specified, one for costs and one for  
42 effects, which take into account the hierarchical structure of the data. MLMs will be combined  
43 with cluster bootstrapping, which is recommended for resampling clustered data.<sup>76</sup> Across  
44 the four study groups, mean costs and QALYs will be compared to assess if any of the  
45 treatments are less effective and more expensive than the other treatments. If so,  
46 incremental cost-effectiveness ratios (ICERs) will not be estimated in relation to that  
47 treatment.<sup>77</sup> Otherwise, ICERs will be estimated by calculating the difference in costs  
48 between two treatment options divided by the difference in effectiveness of these two  
49 treatment options. We will bootstrap seemingly unrelated regression equation (SURE)  
50 models to generate 5,000 simulations of cost and effect pairs while allowing for correlated  
51  
52  
53  
54  
55  
56  
57  
58  
59  
60

09.10.2021, version 1.0, Spiegelhalter et al. 19

1  
2  
3 residuals of the cost and effect equations and adjusting for potential confounders.<sup>78</sup> The joint  
4 uncertainty surrounding costs and effects will be summarised using cost-effectiveness  
5 acceptability curves (CEACs) based on a net benefit regression framework.<sup>79</sup> CEACs show  
6 the probability of an intervention being cost effective in comparison with the alternatives for a  
7 range of different willingness-to-pay thresholds. For patients insured by BARMER, the  
8 validity of the TiC-P will be assessed with secondary data from the health insurance.  
9  
10  
11  
12  
13  
14

15  
16 Qualitative interviews of patients, GPs and e-coaches will be used to assess their experience  
17 of positive and negative aspects of the stepped care model. The interviews will be recorded,  
18 transcribed, and analysed based on qualitative content analysis. An inductive-deductive  
19 approach will be applied along the interview guide.  
20  
21  
22  
23  
24  
25  
26  
27  
28

## 29 **2.10. Patient and public involvement**

30  
31  
32 No patient involvement. Public representatives approved the trial objectives and design as  
33 part of the application to the Innovationsfonds of the German Federal Joint Committee  
34  
35  
36  
37  
38  
39

## 40 **3. Discussion**

41  
42  
43 Insomnia is a common, costly and impairing sleep disorder. According to clinical guidelines,  
44 the first-line therapy is CBT-I, however, only few patients with insomnia have access to this  
45 treatment. Internet-delivered CBT-I has the potential to disseminate the recommended  
46 treatment to a larger number of patients. This study will determine whether a stepped care  
47 model for insomnia that includes psychoeducational treatment by GPs, internet-delivered  
48 CBT-I and specialised medical treatment, improves insomnia severity as well as  
49 psychological and physical well-being.  
50  
51  
52  
53  
54  
55  
56  
57  
58  
59  
60

1  
2  
3 **Authors statement:** K. Spiegelhalter, D. D. Ebert, H. Baumeister, and D. Riemann  
4 conceived the project, have overall responsibility for the trial design and treatment design  
5 and drafted the trial protocol. C. Buntrock, M. Burkhardt, E. Heber, M. Kuhn, A. Maun, and M.  
6 Moshagen contributed to trial design. A. Al-Kamaly, M. Franke, L. Frase, E. Heber, K. Helm,  
7 D. Lehr, and A. Maun contributed to treatment design. H. Baumeister, M. Bader, N.  
8 Bauereiß, L. Braun, P. Dülsen, A. M. Küchler, M. Moshagen, and L. Simon are responsible  
9 for statistical analysis. C. Buntrock is responsible for economic analysis. All authors provided  
10 critical review on the trial protocol and approved the final manuscript.  
11  
12  
13  
14  
15  
16  
17  
18  
19  
20  
21  
22

23 **Funding:** The described work was supported by funding from the Innovationsfonds of the  
24 German Federal Joint Committee (Gemeinsamer Bundesausschuss/ G-BA; grant  
25 01NVF18030). The funding source had no involvement in study design, in the collection,  
26 analysis and interpretation of data, in the writing of the report, and in the decision to submit  
27 the trial protocol for publication.  
28  
29  
30  
31  
32  
33  
34  
35  
36  
37  
38  
39  
40  
41  
42  
43  
44  
45  
46  
47  
48  
49  
50  
51  
52  
53  
54  
55  
56  
57  
58  
59  
60

## References

1. Morin CM, Drake CL, Harvey AG, *et al.* Insomnia disorder. *Nat Rev Dis Primers* 2015;**1**:15026.
2. Ohayon MM. Epidemiology of insomnia: what we know and what we still need to learn. *Sleep Med Rev* 2002;**6**:97-111.
3. Shochat T, Umphress J, Israel AG, *et al.* Insomnia in primary care patients. *Sleep* 1999;**22**:S359-65.
4. Kyle SD, Morgan K, Espie CA. Insomnia and health-related quality of life. *Sleep Med Rev* 2010;**14**:69-82.
5. Hertenstein E, Feige B, Gmeiner T, *et al.* Insomnia as a predictor of mental disorders: a systematic review and meta-analysis. *Sleep Med Rev* 2019;**43**:96-105.
6. Lane JM, Jones SE, Dashti HS, *et al.* Biological and clinical insights from genetics of insomnia symptoms. *Nat Genet* 2019;**51**:387-93.
7. Li M, Zhang XW, Hou WS, *et al.* Insomnia and risk of cardiovascular disease: a meta-analysis of cohort studies. *Int J Cardiol* 2014;**176**:1044-7.
8. Qaseem A, Kansagara D, Forcica MA, *et al.* Management of chronic insomnia disorder in adults: a clinical practice guideline from the American College of Physicians. *Ann Intern Med* 2016;**165**:125-33.
9. Riemann D, Baglioni C, Bassetti C, *et al.* European guideline for the diagnosis and treatment of insomnia. *J Sleep Res* 2017;**26**:675-700.
10. Grobe TG, Steinmann S, Gerr J. *Gesundheitsreport 2019 – Schlafstörungen. Schriftenreihe zur Gesundheitsanalyse – Band 17.* BARMER, 2019.
11. Schlack R, Hapke U, Maske U, *et al.* Frequency and distribution of sleep problems and insomnia in the adult population in Germany: results of the German Health Interview and Examination Survey for Adults (DEGS1). *Bundesgesundheitsblatt Gesundheitsforschung Gesundheitsschutz* 2013;**56**:740-8.
12. Buth S, Holzbach R, Martens MS, *et al.* Problematic medication with benzodiazepines, "Z-drugs", and opioid analgesics. *Dtsch Arztebl Int* 2019;**116**:607-15.



13. Thiarth H, Ebert DD, Lehr D, *et al.* Internet-based cognitive behavioral therapy for insomnia: a health economic evaluation. *Sleep* 2016;**39**:1769-78.
14. Léger D, Bayon V. Societal costs of insomnia. *Sleep Med Rev* 2010;**14**:379-89.
15. Daley M, Morin CM, LeBlanc M, *et al.* The economic burden of insomnia: direct and indirect costs for individuals with insomnia syndrome, insomnia symptoms, and good sleepers. *Sleep* 2009;**32**:55-64.
16. Ritterband LM, Thorndike FP, Gonder-Frederick L, *et al.* Efficacy of an internet-based behavioral intervention for adults with insomnia. *Arch Gen Psychiatry* 2009;**66**:692-8.
17. Ebert DD, Van Daele T, Nordgreen T, *et al.* Internet- and mobile-based psychological interventions: applications, efficacy, and potential for improving mental health: a report of the EFPA E-Health Taskforce. *Eur Psychol* 2018;**23**:167-187.
18. Zachariae R, Lyby MS, Ritterband LM, *et al.* Efficacy of internet-delivered cognitive-behavioral therapy for insomnia – a systematic review and meta-analysis of randomized controlled trials. *Sleep Med Rev* 2016;**30**:1-10.
19. Soh HL, Ho RC, Ho CS, *et al.* Efficacy of digital cognitive behavioural therapy for insomnia: a meta-analysis of randomised controlled trials. *Sleep Med* 2020;**75**:315-25.
20. Van Straten A, van der Zweerde T, Kleiboer A, *et al.* Cognitive and behavioral therapies in the treatment of insomnia: a meta-analysis. *Sleep Med Rev* 2018;**38**:3-16.
21. Blom K, Jernelov S, Ruck C, *et al.* Three-Year Follow-Up of Insomnia and Hypnotics after Controlled Internet Treatment for Insomnia. *Sleep* 2016;**39**:1267-74.
22. Ritterband LM, Thorndike FP, Ingersoll KS, *et al.* Effect of a web-based cognitive behavior therapy for insomnia intervention with 1-year follow-up: a randomized clinical trial. *JAMA Psychiatry* 2017;**74**:68-75.
23. Cheung JM, Jarrin DC, Ballot O, *et al.* A systematic review of cognitive behavioral therapy for insomnia implemented in primary care and community settings. *Sleep Med Rev* 2019;**44**:23-36.

09.10.2021, version 1.0, Spiegelhalter et al. 23

- 1
- 2
- 3 24. Van der Zweerde T, Lancee J, Slottje P, *et al.* Nurse-guided internet-delivered
- 4 cognitive behavioral therapy for insomnia in general practice: results from a pragmatic
- 5 randomized clinical trial. *Psychother Psychosom* 2020;**89**:174-84.
- 6
- 7
- 8
- 9 25. Espie CA. "Stepped care": a health technology solution for delivering cognitive
- 10 behavioral therapy as first line insomnia treatment. *Sleep* 2009;**32**:1549-58.
- 11
- 12
- 13 26. Salomonsson S, Santoft F, Lindsäter, *et al.* Stepped care in primary care – guided self-
- 14 help and face-to-face cognitive behavioural therapy for common mental disorders: a
- 15 randomized controlled trial. *Psychol Med* 2018;**48**:1644-54.
- 16
- 17
- 18 27. Forsell E, Jernelöv S, Blom K, *et al.* Proof of concept for an adaptive treatment strategy
- 19 to prevent failures in internet-delivered CBT-I: a single-blind randomized clinical trial
- 20 with insomnia patients. *Am J Psychiatry* 2019;**176**:315-23.
- 21
- 22
- 23 28. Zhou ES, Michaud AL, Recklitis CJ. Developing efficient and effective behavioral
- 24 treatment for insomnia in cancer survivors: results of a stepped care trial. *Cancer*
- 25 *2020*;**126**:165-73.
- 26
- 27
- 28 29. Baumeister H, Reichler L, Munzinger M, *et al.* The impact of guidance on internet-
- 29 based mental health interventions – a systematic review. *Internet Interv* 2014;**1**:205-15.
- 30
- 31
- 32 30. Espie CA, Kyle SD, Williams C, *et al.* A randomized, placebo-controlled trial of online
- 33 cognitive behavioral therapy for chronic insomnia disorder delivered via an automated
- 34 media-rich web application. *Sleep* 2012;**35**:769-81.
- 35
- 36
- 37 31. Espie CA, Emsley R, Kyle SD, *et al.* Effect of digital cognitive-behavioral therapy for
- 38 insomnia on health, psychological well-being, and sleep-related quality of life: a
- 39 randomized clinical trial. *JAMA Psychiatry* 2019;**76**:21-30.
- 40
- 41
- 42 32. Lancee J, van den Bout J, Sorbi MJ, *et al.* Motivational support provided via email
- 43 improves the effectiveness of internet-delivered self-help treatment for insomnia: a
- 44 randomized trial. *Behav Res Ther* 2013;**51**:797-805.
- 45
- 46
- 47 33. Zwarenstein M, Treweek S, Gagnier JJ, *et al.* Pragmatic Trials in Healthcare (Practihc)
- 48 group. Improving the reporting of pragmatic trials: an extension of the CONSORT
- 49 statement. *BMJ* 2008;**337**:a2390.
- 50
- 51
- 52
- 53
- 54
- 55
- 56
- 57
- 58
- 59
- 60

- 1
- 2
- 3 34. Schulz KF, Altman DG, Moher D. CONSORT 2010 statement: updated guidelines for
- 4 reporting parallel group randomised trials. PLoS Med 2010;**7**:e1000251.
- 5
- 6
- 7 35. Campbell MK, Piaggio G, Elbourne DR, *et al.* Consort 2010 statement: extension to
- 8 cluster randomised trials. BMJ 2012;**345**:e5661.
- 9
- 10
- 11 36. Piaggio G, Elbourne DR, Pocock SJ, *et al.* Reporting of noninferiority and equivalence
- 12 randomized trials: extension of the CONSORT 2010 statement. JAMA 2012;**308**:2594-
- 13 604.
- 14
- 15
- 16
- 17 37. Montgomery P, Grant S, Mayo-Wilson E, *et al.* Reporting randomised trials of social
- 18 and psychological interventions: the CONSORT-SPI 2018 extension. Trials
- 19 2018;**19**:407.
- 20
- 21
- 22
- 23 38. Juszczak E, Altman DG, Hopewell S, *et al.* Reporting of multi-arm parallel-group
- 24 randomized trials: extension of the CONSORT 2010 statement. JAMA 2019;**321**:1610-
- 25 20.
- 26
- 27
- 28
- 29 39. Chan AW, Tetzlaff JM, Altman DG, *et al.* SPIRIT 2013 statement: defining standard
- 30 protocol items for clinical trials. Ann Intern Med 2013;**158**:200-7.
- 31
- 32
- 33 40. Thiart H, Lehr D, Ebert DD, *et al.* Log in and breathe out: internet-based recovery
- 34 training for sleepless employees with work-related strain – results of a randomized
- 35 controlled trial. Scand J Work Environ Health 2015;**41**:164-74.
- 36
- 37
- 38 41. Ebert DD, Berking M, Thiart H, *et al.* Restoring depleted resources: efficacy and
- 39 mechanisms of change of an internet-based unguided recovery training for better sleep
- 40 and psychological detachment from work. Health Psychol 2015;**34S**:1240-51.
- 41
- 42
- 43 42. Behrendt D, Ebert DD, Spiegelhalter K, *et al.* Efficacy of a self-help web-based
- 44 recovery training in improving sleep in workers: randomized controlled trial in the
- 45 general working population. J Med Internet Res 2020;**22**:e13346.
- 46
- 47
- 48 43. Bastien CH, Vallières A, Morin CM. Validation of the Insomnia Severity Index as an
- 49 outcome measure for insomnia research. Sleep Med 2001;**2**:297-307.
- 50
- 51
- 52
- 53
- 54
- 55
- 56
- 57
- 58
- 59
- 60

09.10.2021, version 1.0, Spiegelhalter et al. 25

- 1  
2  
3 44. Morin CM, Belleville G, Belanger L, *et al.* The Insomnia Severity Index: psychometric  
4 indicators to detect insomnia cases and evaluate treatment response. *Sleep*  
5 2011;**34**:601-8.  
6  
7
- 8  
9 45. Gagnon C, Bélanger L, Ivers H, *et al.* Validation of the Insomnia Severity Index in  
10 primary care. *J Am Board Fam Med* 2013;**26**:701-10.  
11
- 12 46. Buysse DJ, Reynolds CF 3<sup>rd</sup>, Monk TH, *et al.* The Pittsburgh Sleep Quality Index: a  
13 new instrument for psychiatric practice and research. *Psychiatry Res* 1989;**28**:193-213.  
14
- 15 47. Carpenter JS, Andrykowski MA. Psychometric evaluation of the Pittsburgh Sleep  
16 Quality Index. *J Psychosom Res* 1998;**45**:5-13.  
17
- 18 48. Richardson J, Iezzi A, Khan MA, *et al.* Validity and reliability of the Assessment of  
19 Quality of Life (AQoL)-8D multi-attribute utility instrument. *Patient* 2014;**7**:85-96.  
20
- 21 49. Rush AJ, Trivedi MH, Ibrahim HM, *et al.* The 16-item Quick Inventory of Depressive  
22 Symptomatology (QIDS), clinician rating (QIDS-C), and self-report (QIDS-SR): a  
23 psychometric evaluation in patients with chronic major depression. *Biol Psychiatry*  
24 2003;**54**:573-83.  
25
- 26 50. Trujols J, de Diego-Adelino J, Feliu-Soler A, *et al.* Looking into the effect of multi-item  
27 symptom domains on psychometric characteristics of the Quick Inventory of  
28 Depressive Symptomatology-Self Report (QIDS-SR16). *Psychiatry Res* 2018;**267**:126-  
29 30.  
30
- 31 51. Lamoureux BE, Linardatos E, Fresco DM, *et al.* Using the QIDS-SR16 to identify major  
32 depressive disorder in primary care medical patients. *Behav Ther* 2010;**41**:423-31.  
33
- 34 52. Spitzer RL, Kroenke K, Williams JB, *et al.* A brief measure for assessing generalized  
35 anxiety disorder: the GAD-7. *Arch Intern Med* 2006;**166**:1092-7.  
36
- 37 53. Löwe B, Decker O, Müller S, *et al.* Validation and standardization of the generalized  
38 anxiety disorder screener (GAD-7) in the general population. *Med Care* 2008;**46**:266-  
39 74.  
40
- 41 54. Gierk B, Kohlmann S, Kroenke K, *et al.* The somatic symptom scale-8 (SSS-8): a brief  
42 measure of somatic symptom burden. *JAMA Intern Med* 2014;**174**:399-407.  
43  
44  
45  
46  
47  
48  
49  
50  
51  
52  
53  
54  
55  
56  
57  
58  
59  
60

- 1  
2  
3 55. Hakkaart-van Roijen L, van Straten A, Donker M, Tiemens B. Manual Trimbos/iMTA  
4 questionnaire for costs associated with psychiatric illness (TiC-P). Erasmus University:  
5 2002.  
6  
7  
8
- 9 56. Bouwmans C, De Jong K, Timman R, Zijlstra-Vlasveld M, Van der Feltz-Cornelis C,  
10 Tan Swan S, Hakkaart-van Roijen L. Feasibility, reliability and validity of a  
11 questionnaire on healthcare consumption and productivity loss in patients with a  
12 psychiatric disorder (TiC-P). *BMC Health Serv Res* 2013;13:217.  
13  
14  
15
- 16 57. Buntrock C, Lehr D, Smit F, Horvath H, Berking M, Spiegelhalter K, Riper H, Ebert DD.  
17 Guided internet-based cognitive behavioral therapy for insomnia: health-economic  
18 evaluation from the societal and public health care perspective alongside a randomized  
19 controlled trial. *J Med Internet Res* 2021;23:e25609.  
20  
21  
22  
23  
24  
25
- 26 58. Bock JO, Brettschneider C, Seidl H, *et al.* Ermittlung standardisierter Bewertungssätze  
27 aus gesellschaftlicher Perspektive für die gesundheitsökonomische Evaluation.  
28 *Gesundheitswesen* 2015;77:53-61.  
29  
30  
31
- 32 59. Gómez Penedo JM, Berger T, Grosse Holtforth M, *et al.* The Working Alliance  
33 Inventory for guided Internet interventions (WAI-I). *J Clin Psychol* 2020;76:973-86.  
34  
35  
36
- 37 60. Attkisson CC, Zwick R. The Client Satisfaction Questionnaire. Psychometric properties  
38 and correlations with service utilization and psychotherapy outcome. *Eval Program*  
39 *Plann* 1982;5:233-7.  
40  
41  
42
- 43 61. Boß L, Lehr D, Reis D, *et al.* Reliability and validity of assessing user satisfaction with  
44 web-based health interventions. *J Med Internet Res* 2016;18:e234.  
45  
46  
47
- 48 62. Rozental A, Kottorp A, Forsström D, *et al.* The Negative Effects Questionnaire:  
49 psychometric properties of an instrument for assessing negative effects in  
50 psychological treatments. *Behav Cogn Psychother* 2019;47:559-72.  
51  
52  
53
- 54 63. Schwarzer R. *Self-efficacy. Thought control of action.* New York: Taylor & Francis,  
55 1992.  
56  
57
- 58 64. Morin CM, Stone J, Trinkle D, *et al.* Dysfunctional beliefs and attitudes about sleep  
59 among older adults with and without insomnia complaints. *Psychol Aging* 1993;8:463-7.  
60

- 1  
2  
3 65. Espie CA, Inglis SJ, Harvey L, *et al.* Insomniacs' attributions. Psychometric properties  
4 of the Dysfunctional Beliefs and Attitudes about Sleep Scale and the Sleep Disturbance  
5 Questionnaire. *J Psychosom Res* 2000;**48**:141-8.  
6  
7
- 8  
9 66. Nicassio PM, Mendlowitz DR, Fussell JJ, *et al.* The phenomenology of the pre-sleep  
10 state: the development of the pre-sleep arousal scale. *Behav Res Ther* 1985;**23**:263-  
11 71.  
12  
13
- 14  
15 67. Gieselmann A, de Jong-Meyer R, Pietrowsky R. Kognitive und körperliche Erregung in  
16 der Phase vor dem Einschlafen. Die deutsche Version der Pre-Sleep Arousal Scale  
17 (PSAS). *Z Klin Psychol Psychother* 2012;**41**:73-80.  
18  
19
- 20  
21 68. Mendoza TR, Wang XS, Cleeland CS, *et al.* The rapid assessment of fatigue severity  
22 in cancer patients: use of the Brief Fatigue Inventory. *Cancer* 1999;**85**:1186-96.  
23  
24
- 25  
26 69. Cohen S, Kamarck T, Mermelstein R. A global measure of perceived stress. *J Health*  
27 *Soc Behav* 1983;**24**:385-96.  
28  
29
- 30  
31 70. Mastin DF, Bryson J, Corwyn R. Assessment of sleep hygiene using the sleep hygiene  
32 index. *J Behav Med* 2006;**29**:223-7.  
33  
34
- 35  
36 71. Garnefski N, Kraaij V. Cognitive emotion regulation questionnaire – development of a  
37 short 18-item version (CERQ-short). *Pers Individ Differ* 2006;**41**:1045-53.  
38  
39
- 40  
41 72. Aldiabat KM, Le Navenec CL. Data saturation: the mysterious step in grounded theory  
42 methodology. *Qual Rep* 2018;**23**:245-61.  
43  
44
- 45  
46 73. Francis JJ, Johnston M, Robertson C, *et al.* What is an adequate sample size?  
47 Operationalising data saturation for theory-based interview studies. *Psychol Health*  
48 2010;**25**:1229-45.  
49  
50
- 51  
52 74. Laupacis A, Sackett DL, Roberts RS. An assessment of clinically useful measures of  
53 the consequences of treatment. *N Engl J Med* 1988;**318**:1728-33.  
54  
55
- 56  
57 75. Jacobson NS, Truax P. Clinical significance: a statistical approach to defining  
58 meaningful change in psychotherapy research. *J Consult Clin Psychol* 1991;**59**:12-9.  
59  
60
- 60  
61 76. Ren S, Lai H, Tong W, *et al.* Nonparametric bootstrapping for hierarchical data. *J Appl*  
62 *Stat* 2010;**37**:1487-98.

- 1  
2  
3 77. Glick HA, Doshi JA, Sonnad SS, Polsky D. *Economic evaluation in clinical trials*.  
4  
5 Oxford: Oxford University Press, 2007.  
6  
7 78. Willan AR, Briggs AH, Hoch JS. Regression methods for covariate adjustment and  
8  
9 subgroup analysis for non-censored cost-effectiveness data. *Health Econ* 2004;**13**:461-  
10  
11 75.  
12  
13 79. Hoch JS, Rockx MA, Krahn AD. Using the net benefit regression framework to  
14  
15 construct cost-effectiveness acceptability curves: an example using data from a trial of  
16  
17 external loop recorders versus Holter monitoring for ambulatory monitoring of  
18  
19 “community acquired” syncope. *BMC Health Serv Res* 2006;**6**:68.  
20  
21  
22  
23  
24  
25  
26  
27  
28  
29  
30  
31  
32  
33  
34  
35  
36  
37  
38  
39  
40  
41  
42  
43  
44  
45  
46  
47  
48  
49  
50  
51  
52  
53  
54  
55  
56  
57  
58  
59  
60

## Figure Legends

**Figure 1:** Stepped care model for insomnia that will be tested in the current trial. CBT-I: cognitive-behavioural treatment for insomnia; GPs: general practitioners.

**Figure 2:** IG1: intervention group 1 ('standard' version of step 2 of the stepped care model); IG2: intervention group 2 ('flex' version of step 2 of the stepped care model); IG3: intervention group 3 ('basic' version of step 2 of the stepped care model); TAU: treatment-as-usual; W: weeks; M: months; ITT: intention-to-treat.



**Table 1:** Overview of the assessments. <sup>1</sup> The ISI at T3 (6 months after T0) is the primary outcome of this trial; <sup>2</sup> only in patients of the intervention groups (IG1, IG2, IG3) who entered step 2 of the stepped care model; <sup>3</sup> only in patients of the intervention groups (IG1, IG2, IG3) not completing at least 80% of the internet-delivered intervention. ISI: Insomnia Severity Index; PSQI: Pittsburgh Sleep Quality Index; AQoL-8D: Assessment of Quality of Life instrument; QIDS-SR16: Quick Inventory of Depressive Symptoms in the self-report format; GAD-7: General Anxiety Disorder 7 questionnaire; SSS-8: Somatic Symptom Scale 8; TiC-P: Trimbos/iMTA questionnaire for costs associated with psychiatric illness; DBAS-10: Dysfunctional Beliefs and Attitudes about Sleep Scale; PSAS: Pre-Sleep Arousal Scale; BFI: Brief Fatigue Inventory; PSS: Perceived Stress Scale; SHI: Sleep Hygiene Index; CERQ-short: Cognitive Emotion Regulation Questionnaire; WAI-I: Working Alliance Inventory for guided Internet interventions; TAI-OT: Technological Alliance Inventory; CSQ-8: Client Satisfaction Questionnaire; NEQ: Negative Effects Questionnaire.

| Activity/Assessment                                                                  | T-1       | T0                | T1               | T2                | T3                |
|--------------------------------------------------------------------------------------|-----------|-------------------|------------------|-------------------|-------------------|
|                                                                                      | Pre-study | Baseline (week 0) | 4 weeks after T0 | 12 weeks after T0 | 6 months after T0 |
| Eligibility screen                                                                   | X         |                   |                  |                   |                   |
| Informed consent                                                                     | X         |                   |                  |                   |                   |
| <b>Primary outcome</b>                                                               |           |                   |                  |                   |                   |
| Insomnia severity (ISI)                                                              |           | X                 | X                | X                 | X <sup>1</sup>    |
| <b>Secondary outcomes</b>                                                            |           |                   |                  |                   |                   |
| Sleep quality (PSQI)                                                                 |           | X                 | X                | X                 | X                 |
| Quality of life (AQoL-8D)                                                            |           | X                 | X                | X                 | X                 |
| Depressive symptoms (QIDS-SR16)                                                      |           | X                 | X                | X                 | X                 |
| Anxiety symptoms (GAD-7)                                                             |           | X                 | X                | X                 | X                 |
| Somatic symptoms (SSS-8)                                                             |           | X                 | X                | X                 | X                 |
| Costs (TiC-P)                                                                        |           | X                 |                  | X                 | X                 |
| <b>Potential treatment moderators and mediators</b>                                  |           |                   |                  |                   |                   |
| Dysfunctional beliefs and attitudes about sleep (DBAS-10)                            |           | X                 | X                | X                 | X                 |
| Pre-sleep arousal (PSAS)                                                             |           | X                 | X                | X                 | X                 |
| Fatigue (BFI)                                                                        |           | X                 | X                | X                 | X                 |
| Stress (PSS)                                                                         |           | X                 | X                | X                 | X                 |
| Sleep hygiene behaviour (SHI)                                                        |           | X                 | X                | X                 | X                 |
| Emotion regulation (CERQ-short)                                                      |           | X                 | X                | X                 | X                 |
| <b>Intervention-related variables</b>                                                |           |                   |                  |                   |                   |
| Alliance (WAI-I)                                                                     |           |                   |                  | X <sup>2</sup>    |                   |
| Technological alliance (TAI-OT)                                                      |           |                   |                  | X <sup>2</sup>    |                   |
| Client satisfaction (CSQ-8)                                                          |           |                   |                  |                   | X                 |
| Adverse events and negative effects (NEQ, Questionnaire on adverse effects of CBT-I) |           |                   |                  | X                 | X                 |
| Dropout Questionnaire                                                                |           |                   |                  | X <sup>3</sup>    |                   |

1  
2  
3  
4  
5  
6  
7  
8  
9  
10  
11  
12  
13  
14  
15  
16  
17  
18  
19  
20  
21  
22  
23  
24  
25  
26  
27  
28  
29  
30  
31

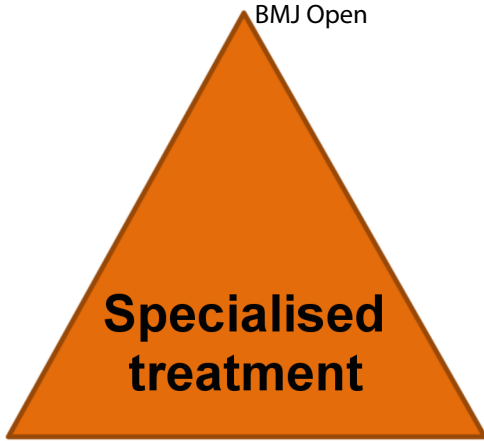

**Step 3**

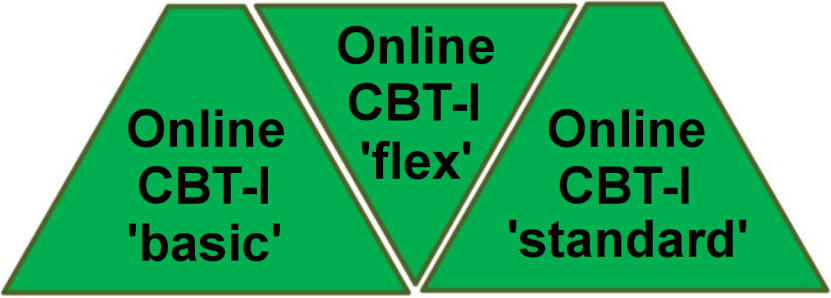

**Step 2**

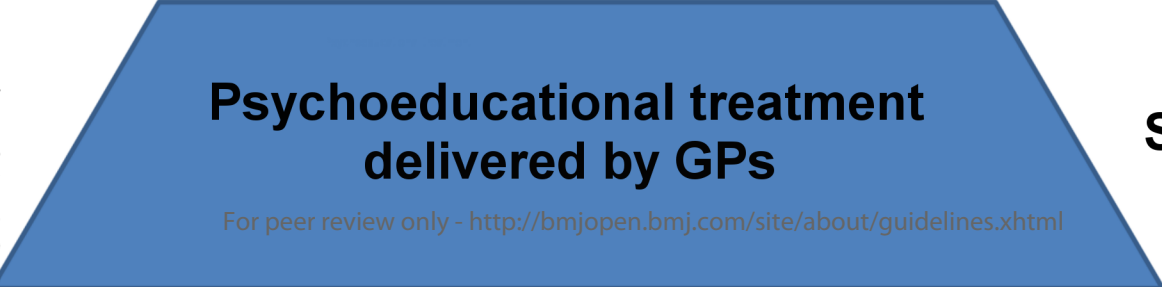

**Step 1**

Enrollment

Assessed for eligibility

Excluded

- Not meeting inclusion criteria
- Declined to participate

Randomisation  
(n = 320 cluster)

Allocation

Allocated to IG1  
96 cluster  
1280 patients

Allocated to IG2  
96 cluster  
1280 patients

Allocated to IG3  
96 cluster  
1280 patients

Allocated to TAU  
32 cluster  
428 patients

Assessments

T0 (baseline)  
T1 (T0 + 4 W)  
T2 (T0 + 12 W)  
T3 (T0 + 6 M)

T0 (baseline)  
T1 (T0 + 4 W)  
T2 (T0 + 12 W)  
T3 (T0 + 6 M)

T0 (baseline)  
T1 (T0 + 4 W)  
T2 (T0 + 12 W)  
T3 (T0 + 6 M)

T0 (baseline)  
T1 (T0 + 4 W)  
T2 (T0 + 12 W)  
T3 (T0 + 6 M)

Analysis

ITT analysis

ITT analysis

ITT analysis

ITT analysis

1  
2  
3  
4  
5  
6  
7  
8  
9  
10  
11  
12  
13  
14  
15  
16  
17  
18  
19  
20  
21  
22  
23  
24  
25  
26  
27  
28  
29  
30  
31  
32  
33  
34  
35  
36  
37  
38  
39  
40  
41

# Reporting checklist for protocol of a clinical trial.

Based on the SPIRIT guidelines.

## Instructions to authors

Complete this checklist by entering the page numbers from your manuscript where readers will find each of the items listed below.

Your article may not currently address all the items on the checklist. Please modify your text to include the missing information. If you are certain that an item does not apply, please write "n/a" and provide a short explanation.

Upload your completed checklist as an extra file when you submit to a journal.

In your methods section, say that you used the SPIRIT reporting guidelines, and cite them as:

Chan A-W, Tetzlaff JM, Gøtzsche PC, Altman DG, Mann H, Berlin J, Dickersin K, Hróbjartsson A, Schulz KF, Parulekar WR, Krleža-Jerić K, Laupacis A, Moher D. SPIRIT 2013 Explanation and Elaboration: Guidance for protocols of clinical trials. *BMJ*. 2013;346:e7586

|                                   | Reporting Item                                                                                                                  | Page Number |
|-----------------------------------|---------------------------------------------------------------------------------------------------------------------------------|-------------|
| <b>Administrative information</b> |                                                                                                                                 |             |
| Title                             | <a href="#">#1</a> Descriptive title identifying the study design, population, interventions, and, if applicable, trial acronym | 1           |
| Trial registration                | <a href="#">#2a</a> Trial identifier and registry name. If not yet                                                              | 3           |

|    |                     |                                                                         |      |
|----|---------------------|-------------------------------------------------------------------------|------|
| 1  |                     | registered, name of intended registry                                   |      |
| 2  |                     |                                                                         |      |
| 3  |                     |                                                                         |      |
| 4  | Trial registration: | <a href="#">#2b</a> All items from the World Health Organization Trial  | n/a  |
| 5  |                     |                                                                         |      |
| 6  | data set            | Registration Data Set                                                   |      |
| 7  |                     |                                                                         |      |
| 8  |                     |                                                                         |      |
| 9  | Protocol version    | <a href="#">#3</a> Date and version identifier                          | 1-30 |
| 10 |                     |                                                                         |      |
| 11 |                     |                                                                         |      |
| 12 | Funding             | <a href="#">#4</a> Sources and types of financial, material, and other  | 20   |
| 13 |                     |                                                                         |      |
| 14 |                     | support                                                                 |      |
| 15 |                     |                                                                         |      |
| 16 |                     |                                                                         |      |
| 17 | Roles and           | <a href="#">#5a</a> Names, affiliations, and roles of protocol          | 1    |
| 18 |                     |                                                                         |      |
| 19 | responsibilities:   | contributors                                                            |      |
| 20 |                     |                                                                         |      |
| 21 | contributorship     |                                                                         |      |
| 22 |                     |                                                                         |      |
| 23 |                     |                                                                         |      |
| 24 |                     |                                                                         |      |
| 25 | Roles and           | <a href="#">#5b</a> Name and contact information for the trial sponsor  | 1    |
| 26 |                     |                                                                         |      |
| 27 | responsibilities:   |                                                                         |      |
| 28 |                     |                                                                         |      |
| 29 | sponsor contact     |                                                                         |      |
| 30 |                     |                                                                         |      |
| 31 | information         |                                                                         |      |
| 32 |                     |                                                                         |      |
| 33 |                     |                                                                         |      |
| 34 |                     |                                                                         |      |
| 35 | Roles and           | <a href="#">#5c</a> Role of study sponsor and funders, if any, in study | 20   |
| 36 |                     |                                                                         |      |
| 37 | responsibilities:   | design; collection, management, analysis, and                           |      |
| 38 |                     |                                                                         |      |
| 39 | sponsor and funder  | interpretation of data; writing of the report; and the                  |      |
| 40 |                     |                                                                         |      |
| 41 |                     | decision to submit the report for publication,                          |      |
| 42 |                     |                                                                         |      |
| 43 |                     | including whether they will have ultimate authority                     |      |
| 44 |                     |                                                                         |      |
| 45 |                     | over any of these activities                                            |      |
| 46 |                     |                                                                         |      |
| 47 |                     |                                                                         |      |
| 48 |                     |                                                                         |      |
| 49 | Roles and           | <a href="#">#5d</a> Composition, roles, and responsibilities of the     | 8    |
| 50 |                     |                                                                         |      |
| 51 | responsibilities:   | coordinating centre, steering committee, endpoint                       |      |
| 52 |                     |                                                                         |      |
| 53 | committees          | adjudication committee, data management team,                           |      |
| 54 |                     |                                                                         |      |
| 55 |                     | and other individuals or groups overseeing the                          |      |
| 56 |                     |                                                                         |      |
| 57 |                     |                                                                         |      |
| 58 |                     |                                                                         |      |
| 59 |                     |                                                                         |      |
| 60 |                     |                                                                         |      |

1 trial, if applicable (see Item 21a for data monitoring  
2  
3 committee)  
4  
5

## 6 Introduction

7  
8  
9 Background and [#6a](#) Description of research question and justification 5-6  
10  
11 rationale for undertaking the trial, including summary of  
12 relevant studies (published and unpublished)

13  
14  
15 examining benefits and harms for each  
16  
17 intervention  
18

19  
20  
21 Background and [#6b](#) Explanation for choice of comparators 6-7  
22  
23 rationale: choice of  
24 comparators  
25  
26

27  
28 Objectives [#7](#) Specific objectives or hypotheses 7  
29  
30

31  
32 Trial design [#8](#) Description of trial design including type of trial 8  
33  
34 (eg, parallel group, crossover, factorial, single  
35 group), allocation ratio, and framework (eg,  
36 superiority, equivalence, non-inferiority,  
37 exploratory)  
38  
39  
40  
41  
42  
43

## 44 Methods:

45  
46 Participants,  
47  
48 interventions, and  
49  
50 outcomes  
51  
52

53  
54 Study setting [#9](#) Description of study settings (eg, community clinic, 9  
55 academic hospital) and list of countries where data  
56  
57  
58  
59

|    |                      |                                                                             |       |
|----|----------------------|-----------------------------------------------------------------------------|-------|
| 1  |                      | will be collected. Reference to where list of study                         |       |
| 2  |                      |                                                                             |       |
| 3  |                      | sites can be obtained                                                       |       |
| 4  |                      |                                                                             |       |
| 5  |                      |                                                                             |       |
| 6  | Eligibility criteria | <a href="#">#10</a> Inclusion and exclusion criteria for participants. If   | 9     |
| 7  |                      |                                                                             |       |
| 8  |                      | applicable, eligibility criteria for study centres and                      |       |
| 9  |                      |                                                                             |       |
| 10 |                      | individuals who will perform the interventions (eg,                         |       |
| 11 |                      |                                                                             |       |
| 12 |                      | surgeons, psychotherapists)                                                 |       |
| 13 |                      |                                                                             |       |
| 14 |                      |                                                                             |       |
| 15 |                      |                                                                             |       |
| 16 | Interventions:       | <a href="#">#11a</a> Interventions for each group with sufficient detail to | 10-12 |
| 17 |                      |                                                                             |       |
| 18 | description          | allow replication, including how and when they will                         |       |
| 19 |                      |                                                                             |       |
| 20 |                      | be administered                                                             |       |
| 21 |                      |                                                                             |       |
| 22 |                      |                                                                             |       |
| 23 | Interventions:       | <a href="#">#11b</a> Criteria for discontinuing or modifying allocated      | 12-13 |
| 24 |                      |                                                                             |       |
| 25 | modifications        | interventions for a given trial participant (eg, drug                       |       |
| 26 |                      |                                                                             |       |
| 27 |                      | dose change in response to harms, participant                               |       |
| 28 |                      | request, or improving / worsening disease)                                  |       |
| 29 |                      |                                                                             |       |
| 30 |                      |                                                                             |       |
| 31 |                      |                                                                             |       |
| 32 |                      |                                                                             |       |
| 33 | Interventions:       | <a href="#">#11c</a> Strategies to improve adherence to intervention        | 15,17 |
| 34 |                      |                                                                             |       |
| 35 | adherence            | protocols, and any procedures for monitoring                                |       |
| 36 |                      |                                                                             |       |
| 37 |                      | adherence (eg, drug tablet return; laboratory tests)                        |       |
| 38 |                      |                                                                             |       |
| 39 |                      |                                                                             |       |
| 40 |                      |                                                                             |       |
| 41 | Interventions:       | <a href="#">#11d</a> Relevant concomitant care and interventions that       | 9,11  |
| 42 |                      |                                                                             |       |
| 43 | concomitant care     | are permitted or prohibited during the trial                                |       |
| 44 |                      |                                                                             |       |
| 45 |                      |                                                                             |       |
| 46 | Outcomes             | <a href="#">#12</a> Primary, secondary, and other outcomes, including       | 13-16 |
| 47 |                      |                                                                             |       |
| 48 |                      | the specific measurement variable (eg, systolic                             |       |
| 49 |                      |                                                                             |       |
| 50 |                      | blood pressure), analysis metric (eg, change from                           |       |
| 51 |                      |                                                                             |       |
| 52 |                      | baseline, final value, time to event), method of                            |       |
| 53 |                      |                                                                             |       |
| 54 |                      | aggregation (eg, median, proportion), and time                              |       |
| 55 |                      |                                                                             |       |
| 56 |                      | point for each outcome. Explanation of the clinical                         |       |
| 57 |                      |                                                                             |       |
| 58 |                      |                                                                             |       |
| 59 |                      |                                                                             |       |
| 60 |                      |                                                                             |       |

|    |                           |                                                                        |           |
|----|---------------------------|------------------------------------------------------------------------|-----------|
| 1  |                           | relevance of chosen efficacy and harm outcomes                         |           |
| 2  |                           |                                                                        |           |
| 3  |                           | is strongly recommended                                                |           |
| 4  |                           |                                                                        |           |
| 5  |                           |                                                                        |           |
| 6  | Participant timeline      | <a href="#">#13</a> Time schedule of enrolment, interventions          | 10-12, 30 |
| 7  |                           | (including any run-ins and washouts),                                  |           |
| 8  |                           | assessments, and visits for participants. A                            |           |
| 9  |                           | schematic diagram is highly recommended (see                           |           |
| 10 |                           | Figure)                                                                |           |
| 11 |                           |                                                                        |           |
| 12 |                           |                                                                        |           |
| 13 |                           |                                                                        |           |
| 14 |                           |                                                                        |           |
| 15 |                           |                                                                        |           |
| 16 |                           |                                                                        |           |
| 17 |                           |                                                                        |           |
| 18 | Sample size               | <a href="#">#14</a> Estimated number of participants needed to         | 17        |
| 19 |                           | achieve study objectives and how it was                                |           |
| 20 |                           | determined, including clinical and statistical                         |           |
| 21 |                           | assumptions supporting any sample size                                 |           |
| 22 |                           | calculations                                                           |           |
| 23 |                           |                                                                        |           |
| 24 |                           |                                                                        |           |
| 25 |                           |                                                                        |           |
| 26 |                           |                                                                        |           |
| 27 |                           |                                                                        |           |
| 28 |                           |                                                                        |           |
| 29 |                           |                                                                        |           |
| 30 | Recruitment               | <a href="#">#15</a> Strategies for achieving adequate participant      | 9         |
| 31 |                           | enrolment to reach target sample size                                  |           |
| 32 |                           |                                                                        |           |
| 33 |                           |                                                                        |           |
| 34 |                           |                                                                        |           |
| 35 | <b>Methods:</b>           |                                                                        |           |
| 36 |                           |                                                                        |           |
| 37 |                           |                                                                        |           |
| 38 | <b>Assignment of</b>      |                                                                        |           |
| 39 |                           |                                                                        |           |
| 40 | <b>interventions (for</b> |                                                                        |           |
| 41 |                           |                                                                        |           |
| 42 | <b>controlled trials)</b> |                                                                        |           |
| 43 |                           |                                                                        |           |
| 44 |                           |                                                                        |           |
| 45 | Allocation:               | <a href="#">#16a</a> Method of generating the allocation sequence (eg, | 9-10      |
| 46 |                           | computer-generated random numbers), and list of                        |           |
| 47 | sequence                  | any factors for stratification. To reduce                              |           |
| 48 |                           | predictability of a random sequence, details of any                    |           |
| 49 | generation                | planned restriction (eg, blocking) should be                           |           |
| 50 |                           | provided in a separate document that is                                |           |
| 51 |                           |                                                                        |           |
| 52 |                           |                                                                        |           |
| 53 |                           |                                                                        |           |
| 54 |                           |                                                                        |           |
| 55 |                           |                                                                        |           |
| 56 |                           |                                                                        |           |
| 57 |                           |                                                                        |           |
| 58 |                           |                                                                        |           |
| 59 |                           |                                                                        |           |
| 60 |                           |                                                                        |           |



|    |                        |                                                                          |                    |
|----|------------------------|--------------------------------------------------------------------------|--------------------|
| 1  |                        | unavailable to those who enrol participants or                           |                    |
| 2  |                        |                                                                          |                    |
| 3  |                        | assign interventions                                                     |                    |
| 4  |                        |                                                                          |                    |
| 5  |                        |                                                                          |                    |
| 6  | Allocation             | <a href="#">#16b</a> Mechanism of implementing the allocation            | 10                 |
| 7  |                        |                                                                          |                    |
| 8  | concealment            | sequence (eg, central telephone; sequentially                            |                    |
| 9  |                        |                                                                          |                    |
| 10 | mechanism              | numbered, opaque, sealed envelopes), describing                          |                    |
| 11 |                        |                                                                          |                    |
| 12 |                        | any steps to conceal the sequence until                                  |                    |
| 13 |                        |                                                                          |                    |
| 14 |                        | interventions are assigned                                               |                    |
| 15 |                        |                                                                          |                    |
| 16 |                        |                                                                          |                    |
| 17 |                        |                                                                          |                    |
| 18 | Allocation:            | <a href="#">#16c</a> Who will generate the allocation sequence, who      | 9-10               |
| 19 |                        |                                                                          |                    |
| 20 | implementation         | will enrol participants, and who will assign                             |                    |
| 21 |                        |                                                                          |                    |
| 22 |                        | participants to interventions                                            |                    |
| 23 |                        |                                                                          |                    |
| 24 |                        |                                                                          |                    |
| 25 | Blinding (masking)     | <a href="#">#17a</a> Who will be blinded after assignment to             | 10                 |
| 26 |                        |                                                                          |                    |
| 27 |                        | interventions (eg, trial participants, care providers,                   |                    |
| 28 |                        |                                                                          |                    |
| 29 |                        | outcome assessors, data analysts), and how                               |                    |
| 30 |                        |                                                                          |                    |
| 31 |                        |                                                                          |                    |
| 32 |                        |                                                                          |                    |
| 33 | Blinding (masking):    | <a href="#">#17b</a> If blinded, circumstances under which unblinding is | n/a – Participants |
| 34 |                        |                                                                          |                    |
| 35 | emergency              | permissible, and procedure for revealing a                               | will be unblinded  |
| 36 |                        |                                                                          |                    |
| 37 | unblinding             | participant's allocated intervention during the trial                    | after allocation   |
| 38 |                        |                                                                          |                    |
| 39 |                        |                                                                          |                    |
| 40 |                        |                                                                          |                    |
| 41 | <b>Methods: Data</b>   |                                                                          |                    |
| 42 |                        |                                                                          |                    |
| 43 | <b>collection,</b>     |                                                                          |                    |
| 44 |                        |                                                                          |                    |
| 45 | <b>management, and</b> |                                                                          |                    |
| 46 |                        |                                                                          |                    |
| 47 | <b>analysis</b>        |                                                                          |                    |
| 48 |                        |                                                                          |                    |
| 49 |                        |                                                                          |                    |
| 50 |                        |                                                                          |                    |
| 51 | Data collection plan   | <a href="#">#18a</a> Plans for assessment and collection of outcome,     | 13-16              |
| 52 |                        |                                                                          |                    |
| 53 |                        | baseline, and other trial data, including any related                    |                    |
| 54 |                        |                                                                          |                    |
| 55 |                        | processes to promote data quality (eg, duplicate                         |                    |
| 56 |                        |                                                                          |                    |
| 57 |                        | measurements, training of assessors) and a                               |                    |
| 58 |                        |                                                                          |                    |
| 59 |                        |                                                                          |                    |
| 60 |                        |                                                                          |                    |

|    |                        |                                                                             |       |
|----|------------------------|-----------------------------------------------------------------------------|-------|
| 1  |                        | description of study instruments (eg,                                       |       |
| 2  |                        | questionnaires, laboratory tests) along with their                          |       |
| 3  |                        | reliability and validity, if known. Reference to                            |       |
| 4  |                        | where data collection forms can be found, if not in                         |       |
| 5  |                        | the protocol                                                                |       |
| 6  |                        |                                                                             |       |
| 7  |                        |                                                                             |       |
| 8  |                        |                                                                             |       |
| 9  |                        |                                                                             |       |
| 10 |                        |                                                                             |       |
| 11 |                        |                                                                             |       |
| 12 |                        |                                                                             |       |
| 13 | Data collection plan:  | <a href="#">#18b</a> Plans to promote participant retention and             | 9-10  |
| 14 | retention              | complete follow-up, including list of any outcome                           |       |
| 15 |                        | data to be collected for participants who                                   |       |
| 16 |                        | discontinue or deviate from intervention protocols                          |       |
| 17 |                        |                                                                             |       |
| 18 |                        |                                                                             |       |
| 19 |                        |                                                                             |       |
| 20 |                        |                                                                             |       |
| 21 |                        |                                                                             |       |
| 22 | Data management        | <a href="#">#19</a> Plans for data entry, coding, security, and storage,    | 8,12  |
| 23 |                        | including any related processes to promote data                             |       |
| 24 |                        | quality (eg, double data entry; range checks for                            |       |
| 25 |                        | data values). Reference to where details of data                            |       |
| 26 |                        | management procedures can be found, if not in                               |       |
| 27 |                        | the protocol                                                                |       |
| 28 |                        |                                                                             |       |
| 29 |                        |                                                                             |       |
| 30 |                        |                                                                             |       |
| 31 |                        |                                                                             |       |
| 32 |                        |                                                                             |       |
| 33 |                        |                                                                             |       |
| 34 |                        |                                                                             |       |
| 35 |                        |                                                                             |       |
| 36 |                        |                                                                             |       |
| 37 | Statistics: outcomes   | <a href="#">#20a</a> Statistical methods for analysing primary and          | 17-18 |
| 38 |                        | secondary outcomes. Reference to where other                                |       |
| 39 |                        | details of the statistical analysis plan can be found,                      |       |
| 40 |                        | if not in the protocol                                                      |       |
| 41 |                        |                                                                             |       |
| 42 |                        |                                                                             |       |
| 43 |                        |                                                                             |       |
| 44 |                        |                                                                             |       |
| 45 |                        |                                                                             |       |
| 46 |                        |                                                                             |       |
| 47 | Statistics: additional | <a href="#">#20b</a> Methods for any additional analyses (eg, subgroup      | 18-19 |
| 48 | analyses               | and adjusted analyses)                                                      |       |
| 49 |                        |                                                                             |       |
| 50 |                        |                                                                             |       |
| 51 |                        |                                                                             |       |
| 52 | Statistics: analysis   | <a href="#">#20c</a> Definition of analysis population relating to protocol | 18    |
| 53 | population and         | non-adherence (eg, as randomised analysis), and                             |       |
| 54 | missing data           | any statistical methods to handle missing data (eg,                         |       |
| 55 |                        |                                                                             |       |
| 56 |                        |                                                                             |       |
| 57 |                        |                                                                             |       |
| 58 |                        |                                                                             |       |
| 59 |                        |                                                                             |       |
| 60 |                        |                                                                             |       |

multiple imputation)

## Methods: Monitoring

|                                      |                      |                                                                                                                                                                                                                                                                                                                                       |                           |
|--------------------------------------|----------------------|---------------------------------------------------------------------------------------------------------------------------------------------------------------------------------------------------------------------------------------------------------------------------------------------------------------------------------------|---------------------------|
| Data monitoring:<br>formal committee | <a href="#">#21a</a> | Composition of data monitoring committee (DMC); summary of its role and reporting structure; statement of whether it is independent from the sponsor and competing interests; and reference to where further details about its charter can be found, if not in the protocol. Alternatively, an explanation of why a DMC is not needed | n/a                       |
| Data monitoring:<br>interim analysis | <a href="#">#21b</a> | Description of any interim analyses and stopping guidelines, including who will have access to these interim results and make the final decision to terminate the trial                                                                                                                                                               | n/a – no interim analyses |
| Harms                                | <a href="#">#22</a>  | Plans for collecting, assessing, reporting, and managing solicited and spontaneously reported adverse events and other unintended effects of trial interventions or trial conduct                                                                                                                                                     | 15                        |
| Auditing                             | <a href="#">#23</a>  | Frequency and procedures for auditing trial conduct, if any, and whether the process will be independent from investigators and the sponsor                                                                                                                                                                                           | n/a                       |
| <b>Ethics and dissemination</b>      |                      |                                                                                                                                                                                                                                                                                                                                       |                           |
| Research ethics                      | <a href="#">#24</a>  | Plans for seeking research ethics committee /                                                                                                                                                                                                                                                                                         | 3                         |

|    |                    |                      |                                                        |     |
|----|--------------------|----------------------|--------------------------------------------------------|-----|
| 1  | approval           |                      | institutional review board (REC / IRB) approval        |     |
| 2  |                    |                      |                                                        |     |
| 3  | Protocol           | <a href="#">#25</a>  | Plans for communicating important protocol             | n/a |
| 4  |                    |                      |                                                        |     |
| 5  | amendments         |                      | modifications (eg, changes to eligibility criteria,    |     |
| 6  |                    |                      | outcomes, analyses) to relevant parties (eg,           |     |
| 7  |                    |                      | investigators, REC / IRBs, trial participants, trial   |     |
| 8  |                    |                      | registries, journals, regulators)                      |     |
| 9  |                    |                      |                                                        |     |
| 10 |                    |                      |                                                        |     |
| 11 |                    |                      |                                                        |     |
| 12 |                    |                      |                                                        |     |
| 13 |                    |                      |                                                        |     |
| 14 |                    |                      |                                                        |     |
| 15 | Consent or assent  | <a href="#">#26a</a> | Who will obtain informed consent or assent from        | 8   |
| 16 |                    |                      | potential trial participants or authorised surrogates, |     |
| 17 |                    |                      | and how (see Item 32)                                  |     |
| 18 |                    |                      |                                                        |     |
| 19 |                    |                      |                                                        |     |
| 20 |                    |                      |                                                        |     |
| 21 |                    |                      |                                                        |     |
| 22 |                    |                      |                                                        |     |
| 23 | Consent or assent: | <a href="#">#26b</a> | Additional consent provisions for collection and       | n/a |
| 24 |                    |                      | use of participant data and biological specimens in    |     |
| 25 | ancillary studies  |                      | ancillary studies, if applicable                       |     |
| 26 |                    |                      |                                                        |     |
| 27 |                    |                      |                                                        |     |
| 28 |                    |                      |                                                        |     |
| 29 |                    |                      |                                                        |     |
| 30 |                    |                      |                                                        |     |
| 31 | Confidentiality    | <a href="#">#27</a>  | How personal information about potential and           | 7   |
| 32 |                    |                      | enrolled participants will be collected, shared, and   |     |
| 33 |                    |                      | maintained in order to protect confidentiality         |     |
| 34 |                    |                      | before, during, and after the trial                    |     |
| 35 |                    |                      |                                                        |     |
| 36 |                    |                      |                                                        |     |
| 37 |                    |                      |                                                        |     |
| 38 |                    |                      |                                                        |     |
| 39 |                    |                      |                                                        |     |
| 40 |                    |                      |                                                        |     |
| 41 | Declaration of     | <a href="#">#28</a>  | Financial and other competing interests for            | 2   |
| 42 |                    |                      | principal investigators for the overall trial and each |     |
| 43 | interests          |                      | study site                                             |     |
| 44 |                    |                      |                                                        |     |
| 45 |                    |                      |                                                        |     |
| 46 |                    |                      |                                                        |     |
| 47 |                    |                      |                                                        |     |
| 48 | Data access        | <a href="#">#29</a>  | Statement of who will have access to the final trial   | 20  |
| 49 |                    |                      | dataset, and disclosure of contractual agreements      |     |
| 50 |                    |                      | that limit such access for investigators               |     |
| 51 |                    |                      |                                                        |     |
| 52 |                    |                      |                                                        |     |
| 53 |                    |                      |                                                        |     |
| 54 |                    |                      |                                                        |     |
| 55 |                    |                      |                                                        |     |
| 56 | Ancillary and post | <a href="#">#30</a>  | Provisions, if any, for ancillary and post-trial care, | 12  |
| 57 |                    |                      |                                                        |     |
| 58 |                    |                      |                                                        |     |
| 59 |                    |                      |                                                        |     |
| 60 |                    |                      |                                                        |     |

|    |                       |                      |                                                        |                  |
|----|-----------------------|----------------------|--------------------------------------------------------|------------------|
| 1  | trial care            |                      | and for compensation to those who suffer harm          |                  |
| 2  |                       |                      |                                                        |                  |
| 3  |                       |                      | from trial participation                               |                  |
| 4  |                       |                      |                                                        |                  |
| 5  |                       |                      |                                                        |                  |
| 6  | Dissemination         | <a href="#">#31a</a> | Plans for investigators and sponsor to                 | 3                |
| 7  |                       |                      |                                                        |                  |
| 8  | policy: trial results |                      | communicate trial results to participants,             |                  |
| 9  |                       |                      |                                                        |                  |
| 10 |                       |                      | healthcare professionals, the public, and other        |                  |
| 11 |                       |                      |                                                        |                  |
| 12 |                       |                      | relevant groups (eg, via publication, reporting in     |                  |
| 13 |                       |                      |                                                        |                  |
| 14 |                       |                      | results databases, or other data sharing               |                  |
| 15 |                       |                      |                                                        |                  |
| 16 |                       |                      | arrangements), including any publication               |                  |
| 17 |                       |                      |                                                        |                  |
| 18 |                       |                      | restrictions                                           |                  |
| 19 |                       |                      |                                                        |                  |
| 20 |                       |                      |                                                        |                  |
| 21 |                       |                      |                                                        |                  |
| 22 | Dissemination         | <a href="#">#31b</a> | Authorship eligibility guidelines and any intended     | 20               |
| 23 |                       |                      |                                                        |                  |
| 24 | policy: authorship    |                      | use of professional writers                            |                  |
| 25 |                       |                      |                                                        |                  |
| 26 |                       |                      |                                                        |                  |
| 27 |                       |                      |                                                        |                  |
| 28 | Dissemination         | <a href="#">#31c</a> | Plans, if any, for granting public access to the full  | n/a              |
| 29 |                       |                      |                                                        |                  |
| 30 | policy: reproducible  |                      | protocol, participant-level dataset, and statistical   |                  |
| 31 |                       |                      |                                                        |                  |
| 32 | research              |                      | code                                                   |                  |
| 33 |                       |                      |                                                        |                  |
| 34 |                       |                      |                                                        |                  |
| 35 | <b>Appendices</b>     |                      |                                                        |                  |
| 36 |                       |                      |                                                        |                  |
| 37 |                       |                      |                                                        |                  |
| 38 | Informed consent      | <a href="#">#32</a>  | Model consent form and other related                   | Materials are    |
| 39 |                       |                      |                                                        |                  |
| 40 | materials             |                      | documentation given to participants and                | available in     |
| 41 |                       |                      |                                                        |                  |
| 42 |                       |                      | authorised surrogates                                  | German only but  |
| 43 |                       |                      |                                                        |                  |
| 44 |                       |                      |                                                        | can be submitted |
| 45 |                       |                      |                                                        |                  |
| 46 |                       |                      |                                                        | on request       |
| 47 |                       |                      |                                                        |                  |
| 48 |                       |                      |                                                        |                  |
| 49 |                       |                      |                                                        |                  |
| 50 |                       |                      |                                                        |                  |
| 51 | Biological            | <a href="#">#33</a>  | Plans for collection, laboratory evaluation, and       | n/a              |
| 52 |                       |                      |                                                        |                  |
| 53 | specimens             |                      | storage of biological specimens for genetic or         |                  |
| 54 |                       |                      |                                                        |                  |
| 55 |                       |                      | molecular analysis in the current trial and for future |                  |
| 56 |                       |                      |                                                        |                  |
| 57 |                       |                      | use in ancillary studies, if applicable                |                  |
| 58 |                       |                      |                                                        |                  |
| 59 |                       |                      |                                                        |                  |
| 60 |                       |                      |                                                        |                  |

1 None The SPIRIT Explanation and Elaboration paper is distributed under the terms of the Creative  
2 Commons Attribution License CC-BY-NC. This checklist can be completed online using  
3 <https://www.goodreports.org/>, a tool made by the [EQUATOR Network](#) in collaboration with  
4 [Penelope.ai](#)  
5  
6  
7  
8  
9  
10  
11  
12  
13  
14  
15  
16  
17  
18  
19  
20  
21  
22  
23  
24  
25  
26  
27  
28  
29  
30  
31  
32  
33  
34  
35  
36  
37  
38  
39  
40  
41  
42  
43  
44  
45  
46  
47  
48  
49  
50  
51  
52  
53  
54  
55  
56  
57  
58  
59  
60

# BMJ Open

## Comparative effectiveness of three versions of a stepped care model for insomnia differing in the amount of therapist support in internet-delivered treatment – study protocol for a pragmatic cluster randomised controlled trial (GET Sleep)

|                               |                                                                                                                                                                                                                                                                                                                                                                                                                                                                                                                                                                                                                                                                                                                                                                                                                                                                                                                                                                                                                                                                                                                                                                                                                                                                                                                                                                                                                                                                                                                                                                                                                                                                                                                                                                                                                                                                                                                                                                                                             |
|-------------------------------|-------------------------------------------------------------------------------------------------------------------------------------------------------------------------------------------------------------------------------------------------------------------------------------------------------------------------------------------------------------------------------------------------------------------------------------------------------------------------------------------------------------------------------------------------------------------------------------------------------------------------------------------------------------------------------------------------------------------------------------------------------------------------------------------------------------------------------------------------------------------------------------------------------------------------------------------------------------------------------------------------------------------------------------------------------------------------------------------------------------------------------------------------------------------------------------------------------------------------------------------------------------------------------------------------------------------------------------------------------------------------------------------------------------------------------------------------------------------------------------------------------------------------------------------------------------------------------------------------------------------------------------------------------------------------------------------------------------------------------------------------------------------------------------------------------------------------------------------------------------------------------------------------------------------------------------------------------------------------------------------------------------|
| Journal:                      | <i>BMJ Open</i>                                                                                                                                                                                                                                                                                                                                                                                                                                                                                                                                                                                                                                                                                                                                                                                                                                                                                                                                                                                                                                                                                                                                                                                                                                                                                                                                                                                                                                                                                                                                                                                                                                                                                                                                                                                                                                                                                                                                                                                             |
| Manuscript ID                 | bmjopen-2021-058212.R1                                                                                                                                                                                                                                                                                                                                                                                                                                                                                                                                                                                                                                                                                                                                                                                                                                                                                                                                                                                                                                                                                                                                                                                                                                                                                                                                                                                                                                                                                                                                                                                                                                                                                                                                                                                                                                                                                                                                                                                      |
| Article Type:                 | Protocol                                                                                                                                                                                                                                                                                                                                                                                                                                                                                                                                                                                                                                                                                                                                                                                                                                                                                                                                                                                                                                                                                                                                                                                                                                                                                                                                                                                                                                                                                                                                                                                                                                                                                                                                                                                                                                                                                                                                                                                                    |
| Date Submitted by the Author: | 13-Apr-2022                                                                                                                                                                                                                                                                                                                                                                                                                                                                                                                                                                                                                                                                                                                                                                                                                                                                                                                                                                                                                                                                                                                                                                                                                                                                                                                                                                                                                                                                                                                                                                                                                                                                                                                                                                                                                                                                                                                                                                                                 |
| Complete List of Authors:     | <p>Spiegelhalter, Kai; Medical Center-University of Freiburg, Psychiatry and Psychotherapy<br/> Baumeister, Harald; Universitat Ulm, Institut of Psychology and Education, Department of Clinical Psychology and Psychotherapy;<br/> Al-Kamaly, Abdulwahab; Medical Center - University of Freiburg<br/> Bader, Martina; Ulm University<br/> Bauereiss, Natalie; Ulm University<br/> Benz, Fee; Freiburg University Hospital Clinic of Psychiatry and Psychotherapy<br/> Braun, Lina; Ulm University, Clinical Psychology and Psychotherapy<br/> Buntrock, Claudia; Friedrich-Alexander-Universitat Erlangen-Nurnberg, Clinical Psychology and Psychotherapy<br/> Burkhardt, Maike; BARMER<br/> Cuijpers, Pim; VU University Amsterdam, Department of Clinical Psychology<br/> Domschke, Katharina; University of Freiburg, Center for Basics in Neuromodulation, Faculty of Medicine<br/> Dülsen, Patrick; Ulm University<br/> Franke, Marvin; GET.ON Institut für Online Gesundheitstrainings GmbH<br/> Fraser, Lukas; Freiburg University Hospital Clinic of Psychiatry and Psychotherapy<br/> Heber, Elena; GET.ON Institut für Online Gesundheitstrainings GmbH<br/> Helm, Kathrin; Medical Center – University of Freiburg<br/> Jentsch, Terry; Freiburg University Hospital Clinic of Psychiatry and Psychotherapy<br/> Johann, Anna; Freiburg University Hospital Clinic of Psychiatry and Psychotherapy<br/> Küchler, Ann-Marie; Ulm University, Clinical Psychology and Psychotherapy<br/> Kuhn, Michael; BARMER<br/> Lehr, Dirk; Leuphana University Lueneburg, Department of Health Psychology and Applied Biological Psychology<br/> Maun, Andy; University of Freiburg, Division of General Practice, Faculty of Medicine, Medical Center<br/> Morin, Charles M.; Universite Laval Faculte de medecine,<br/> Moshagen, Morten; Ulm University,<br/> Richter, Kneginja; Klinikum Nurnberg, University Clinic for Psychiatry and Psychotherapy; University Goce Delcev, Faculty for medical</p> |

|                                    |                                                                                                                                                                                                                                                                                                                                                                                                                                                                            |
|------------------------------------|----------------------------------------------------------------------------------------------------------------------------------------------------------------------------------------------------------------------------------------------------------------------------------------------------------------------------------------------------------------------------------------------------------------------------------------------------------------------------|
|                                    | sciences<br>Schiel, Julian; Freiburg University Hospital Clinic of Psychiatry and Psychotherapy<br>Simon, Laura; Ulm University<br>Spille, Lukas; Freiburg University Hospital Clinic of Psychiatry and Psychotherapy<br>Weeß, Hans-Günter; Pfalzkrlinikum Klingenmünster<br>Riemann, Dieter; Freiburg University Hospital,<br>Ebert, David; Technical University of Munich, Department for Sport and Health Sciences, Chair for Psychology and Digital Mental Health Care |
| <b>Primary Subject Heading</b> :   | General practice / Family practice                                                                                                                                                                                                                                                                                                                                                                                                                                         |
| <b>Secondary Subject Heading</b> : | Public health                                                                                                                                                                                                                                                                                                                                                                                                                                                              |
| <b>Keywords</b> :                  | SLEEP MEDICINE, PSYCHIATRY, Adult psychiatry < PSYCHIATRY                                                                                                                                                                                                                                                                                                                                                                                                                  |
|                                    |                                                                                                                                                                                                                                                                                                                                                                                                                                                                            |

SCHOLARONE™  
Manuscripts



## Comparative effectiveness of three versions of a stepped care model for insomnia differing in the amount of therapist support in internet-delivered treatment – study protocol for a pragmatic cluster randomised controlled trial (GET Sleep)

Spiegelhalder K<sup>1\*</sup>, Baumeister H<sup>2\*</sup>, Al-Kamaly A<sup>3</sup>, Bader M<sup>4</sup>, Bauereiß N<sup>2</sup>, Benz F<sup>1</sup>, Braun L<sup>2</sup>, Buntrock C<sup>5</sup>, Burkhardt M<sup>6</sup>, Cuijpers P<sup>7</sup>, Domschke K<sup>1</sup>, Dülsen P<sup>2</sup>, Franke M<sup>5,8</sup>, Frase L<sup>1</sup>, Heber E<sup>8</sup>, Helm K<sup>3</sup>, Jentsch T<sup>1</sup>, Johann AF<sup>1,9</sup>, Kuchler AM<sup>2</sup>, Kuhn M<sup>6</sup>, Lehr D<sup>10</sup>, Maun A<sup>3</sup>, Morin CM<sup>11</sup>, Moshagen M<sup>4</sup>, Richter K<sup>12,13</sup>, Schiel JE<sup>1</sup>, Simon L<sup>2</sup>, Spille L<sup>1</sup>, Weeß HG<sup>14</sup>, Riemann D<sup>1\*</sup>, Ebert DD<sup>8,15\*</sup>

- 1 Department of Psychiatry and Psychotherapy, Medical Center – University of Freiburg, Faculty of Medicine, University of Freiburg, Germany
- 2 Department of Clinical Psychology and Psychotherapy, Institute of Psychology and Education, Ulm University, Ulm, Germany
- 3 Department of Medicine, Institute of General Practice/ Family Medicine, Medical Center - University of Freiburg, Faculty of Medicine, University of Freiburg, Germany
- 4 Department of Psychological Research Methods, Institute of Psychology and Education, Ulm University, Ulm, Germany
- 5 Department of Clinical Psychology and Psychotherapy, Friedrich-Alexander University Erlangen-Nürnberg, Erlangen, Germany
- 6 BARMER, Schwäbisch-Gmünd, BARMER
- 7 Department of Clinical, Neuro and Developmental Psychology, Amsterdam Public Health research institute, Vrije Universiteit Amsterdam, Amsterdam, The Netherlands
- 8 GET.ON Institut für Online Gesundheitstrainings GmbH (operating under the registered brand “HelloBetter”), Hamburg, Germany
- 9 Medical Psychology and Medical Sociology, Faculty of Medicine, University of Freiburg, Germany
- 10 Department of Health Psychology and Applied Biological Psychology, Institute of Psychology, Leuphana University of Lueneburg, Lueneburg, Germany.
- 11 École de psychologie, Université Laval, Québec, Québec, Canada.
- 12 University Clinic for Psychiatry and Psychotherapy, Paracelsus Medical University, Nuremberg, Germany
- 13 Faculty for Social Work, Technical University Nuremberg Georg Simon Ohm, Nuremberg, Germany
- 14 Interdisciplinary Center of Sleep, Pfalzkrankenhaus, Klinikum für Psychiatrie und Neurologie AdöR, Klingenmünster, Germany.
- 15 Department of Sport and Health Sciences, Technical University of Munich, Munich, Germany.

\* These authors contributed equally (Spiegelhalder, Baumeister, Riemann, Ebert)

**Keywords:** Insomnia; Sleep Initiation and Maintenance Disorders; Internet-Based Intervention; Randomised Controlled Trial

**Word count:** 4513 words

**Address for correspondence:**

Kai Spiegelhalder, MD PhD  
 Department of Psychiatry and Psychotherapy  
 Medical Center – University of Freiburg  
 Hauptstraße 5, 79104 Freiburg, Germany  
 Tel: +49 761 270 69780  
 Fax: +49 761 270 66190  
 Email: Kai.Spiegelhalder@uniklinik-freiburg.de

### **Conflict of interest statement**

H. Baumeister received consultancy fees, reimbursement of congress attendance and travel costs as well as payments for lectures from Psychotherapy and Psychiatry Associations as well as Psychotherapy Training Institutes in the context of E-Mental-Health topics. He has been the beneficiary of study support (third-party funding) from several public funding organizations. M. Burkhardt and M. Kuhn are employees of BARMER. K. Domschke is a member of the Janssen Pharmaceuticals Inc. "Steering Committee Neuroscience". M. Franke, E. Heber, D. Lehr and D. D. Ebert are stakeholders of the GET.ON Institut für Online Gesundheitstrainings GmbH (operating under the registered brand "HelloBetter"), which aims to implement scientific findings related to digital health interventions into routine care. HelloBetter distributes the digital intervention for insomnia that is used in this study. C. M. Morin received research grant from Canopy Health, Eisai, Idorsia, and Lallemand Health Solutions; he served as consultant to Eisai, Idorsia, Pear Therapeutics, Sunovion and Weight Watchers, and received royalties from Mapi Research Trust. D. D. Ebert has served as a consultant to/on the scientific advisory boards of Sanofi, Novartis, Minddistrict, Lantern, Schoen Kliniken, Ideamed, German health insurance companies (BARMER, Techniker Krankenkasse) and a number of federal chambers for psychotherapy. None of the other authors declare any conflict of interest.

## Abstract

**Introduction:** It is unclear how internet-delivered cognitive behavioural therapy for insomnia (CBT-I) can be integrated into healthcare systems, and little is known about the optimal level of therapist guidance. The aim of this study is to investigate three different versions of a stepped care model for insomnia (IG1, IG2, IG3) versus treatment-as-usual (TAU). IG1, IG2, and IG3 rely on treatment by general practitioners (GPs) in the entry level and differ in the amount of guidance by e-coaches in internet-delivered CBT-I.

**Methods and analysis:** In this randomised controlled trial, 4,268 patients meeting ICD-10 criteria for insomnia will be recruited. The study will use cluster randomisation of GPs with an allocation ratio of 3:3:3:1 (IG1, IG2, IG3, TAU). In step 1 of the stepped care model, GPs will deliver psychoeducational treatment; in step 2, an internet-delivered CBT-I program will be used; in step 3, GPs will refer patients to specialised treatment. Outcomes will be collected at baseline, and 4 weeks, 12 weeks and 6 months after baseline assessment. The primary outcome is insomnia severity at 6 months. An economic evaluation will be conducted and qualitative interviews will be used to explore barriers and facilitators of the stepped care model.

**Ethics and dissemination:** The study protocol was approved by the Ethics Committee of the Medical Center – University of Freiburg. The results of the study will be published irrespective of the outcome.

**Registration details:** The study has been registered in the German Clinical Trials Register ([https://www.drks.de/drks\\_web/](https://www.drks.de/drks_web/); DRKS00021503).

## Strengths and limitations of the study

- This randomised controlled trial will recruit 4,268 patients and will be the largest clinical trial on insomnia.
- This trial will investigate three different versions of a stepped care model for insomnia which rely on treatment by general practitioners in the entry level and differ in the amount of guidance by e-coaches in internet-delivered CBT-I.
- The primary outcome is insomnia severity. An economic evaluation will be conducted and qualitative interviews will be used to explore barriers and facilitators of the stepped care model.
- Patients with insomnia will not be blind to treatment allocation in this trial.

## 1. Introduction

Insomnia disorder is characterised by difficulties initiating and/or maintaining sleep resulting in significant daytime dysfunction.<sup>1</sup> In Western industrialised countries, 5-10% of the general population<sup>2</sup> and 20% of primary care patients<sup>3</sup> suffer from the disorder. Insomnia is associated with a reduced quality of life,<sup>4</sup> and is a risk factor for other mental disorders, in particular depression and anxiety disorders,<sup>5</sup> as well as for cardiovascular diseases.<sup>6,7</sup>

Clinical guidelines recommend cognitive behavioural therapy for insomnia (CBT-I) as first-line treatment.<sup>8,9</sup> CBT-I is a multi-component intervention consisting of psychoeducation, relaxation therapy, sleep restriction therapy, stimulus control therapy, and cognitive therapy. However, only a small proportion of patients with insomnia has access to this treatment. For example, data from BARMER, a large German public health insurance, indicate that around 1.6% of the insured persons received a diagnosis of insomnia in 2017, but only 10% of these patients received a psychotherapeutic treatment.<sup>10</sup> Assuming a prevalence of insomnia of 5.7% in Germany,<sup>11</sup> this suggests that only 2.8% of all insomnia patients in Germany receive psychotherapeutic treatment. Since cognitive-behavioural therapy is not the only form of psychotherapy reimbursed by German health insurances and the focus of the psychotherapeutic treatment may, in many patients, be a comorbid disorder rather than insomnia, the assumption that 1% of all insomnia patients receive CBT-I might already be a very optimistic estimation. Instead, many insomnia patients are treated with benzodiazepine receptor agonists or sedating antidepressants on a long-term basis,<sup>12</sup> which is potentially harmful and not recommended by clinical guidelines.<sup>8,9</sup> This situation is unfortunate both from a clinical and from a health-economic perspective. Insomnia is associated with estimated annual costs of about 5,900 Euros per person in Germany due to absenteeism and presenteeism.<sup>13</sup> Thus, given its prevalence, a reasonable estimate of the indirect costs of insomnia in Germany is 25 billion Euros per year. This number is broadly in line with previously published socioeconomic data from the United States<sup>14</sup> and Canada.<sup>15</sup>

1  
2  
3 The dissemination of CBT-I is a major healthcare challenge, and internet-delivered  
4 psychotherapy has been suggested as a possible mean to lower the treatment gap.<sup>16</sup>  
5  
6 Compared to face-to-face treatment, main advantages of internet-delivered CBT-I are  
7 convenience, increased accessibility, and potentially lower costs. In particular, internet  
8 interventions are easily accessible anytime and anywhere. Patients do not incur travelling  
9 expenses; they can work at their own pace; they may provide more honest answers in the  
10 privacy of their own home; and barriers related to the stigma of mental disorders may be  
11 reduced.<sup>17</sup> Hence, offering internet-delivered CBT-I might increase the utilisation of  
12 psychotherapy in undertreated populations. Meta-analyses suggest that internet-delivered  
13 CBT-I is highly effective in comparison to waitlist control conditions,<sup>18 19</sup> and that the effects  
14 appear to be comparable in size to those of face-to-face CBT-I.<sup>20</sup> In addition, follow-up data of  
15 up to 3 years demonstrate a high long-term effectiveness of online CBT-I.<sup>21 22</sup>

16  
17  
18  
19  
20  
21  
22  
23  
24  
25  
26  
27  
28  
29 However, at least two questions with a high degree of healthcare relevance remain to be  
30 answered. First, it is unclear how internet-delivered CBT-I can be effectively integrated into  
31 existing healthcare systems that rely on general practitioners (GPs) to take the lead in  
32 coordinating patient care. Previous research has shown that the implementation of CBT-I  
33 techniques in primary care is challenging but promising.<sup>23 24</sup> In line with a stepped care  
34 approach to the treatment of insomnia,<sup>25</sup> GPs may serve as the entry level of a multistep model  
35 that offers more intense support for those with more complicated complaints in a cost-effective  
36 way. Although conceptually appealing, there are very few studies investigating such stepped  
37 care models for insomnia,<sup>26-28</sup> and none of them included active treatment provided by GPs.  
38  
39 Second, little is known about the optimal level of therapist guidance in the context of internet-  
40 delivered CBT-I. While it is generally thought that human support has positive effects on  
41 adherence and efficacy in online mental health interventions,<sup>29</sup> many studies in the insomnia  
42 field have successfully implemented online interventions without any human support/ guidance  
43 (e.g.,<sup>16 22 30 31</sup>). One study has directly compared an online intervention for insomnia with and  
44 without guidance via email and found a superior efficacy in the guided group.<sup>32</sup> However, there  
45  
46  
47  
48  
49  
50  
51  
52  
53  
54  
55  
56  
57  
58  
59  
60

09.10.2021, version 1.0, Spiegelhalder et al. 7

1  
2  
3 is limited knowledge about who needs and who does not need guidance and how this  
4 translates into cost-effectiveness estimates.  
5  
6  
7

8 The central objective of the present study is to improve the quality and efficiency of healthcare  
9 for patients with insomnia. In addition, it is intended to improve interdisciplinary and  
10 intersectoral cooperation between GPs, psychotherapists and medical specialists working in  
11 outpatient and inpatient settings. Three different versions of a stepped care model (intervention  
12 group 1, IG1; intervention group 2, IG2; intervention group 3, IG3) that differ in the amount of  
13 guidance that is provided by e-coaches in the internet-delivered intervention in step 2 will be  
14 compared with treatment-as-usual (TAU) in, to the best of our knowledge, the largest clinical  
15 trial to date on insomnia (see Fig. 1). At step 1, participating GPs will provide a brief  
16 psychoeducational treatment; at step 2, patients will receive an internet intervention based on  
17 CBT-I; and at step 3, patients will be referred to specialised medical face-to-face treatment.  
18 Patients who are unresponsive to the treatment at one step will proceed to the next step of the  
19 model. The primary research question is the effectiveness of the interventions. We will also  
20 investigate differential treatment outcomes in four subgroups of patients: 1) insomnia without  
21 any comorbidity; 2) insomnia with mental comorbidity; 3) insomnia with somatic comorbidity;  
22 4) insomnia with mental and somatic comorbidity. In addition, an economic evaluation will be  
23 carried out and qualitative interviews will be conducted to explore barriers and facilitators of  
24 the stepped care model. In case of a positive evaluation, it is intended to include the stepped  
25 care model in the guidelines of the Federal Joint Committee, the highest decision-making body  
26 of the joint self-government of physicians, dentists, hospitals, and health insurance funds in  
27 Germany.  
28  
29  
30  
31  
32  
33  
34  
35  
36  
37  
38  
39  
40  
41  
42  
43  
44  
45  
46  
47  
48  
49

50  
51 (please insert Figure 1 here)  
52  
53  
54  
55  
56  
57  
58  
59  
60

## 2. Methods

### 2.1. Study design

The study is a four-armed pragmatic parallel-group cluster-randomised controlled trial investigating three different versions of a stepped care model for insomnia versus TAU. The unit of randomisation will be the participating GPs to avoid treatment diffusion. Primary and secondary outcomes as well as moderating and mediating variables and intervention-related variables will be assessed online by patient self-report using LimeSurvey (<https://www.limesurvey.org/>). Online assessments will take place at baseline (T0) and after 4 (T1) and 12 (T2) weeks, as well as 6 months after baseline (T3; see Fig. 2 for trial design). Informed consent will also be given online. The trial might be continued with further annual follow-up assessments after 1-5 years in case of patients' informed consent and dependent on follow-up assessment resources beyond the funded 6 months follow-up. The trial started recruitment of patients in October 2020 and will continue recruiting until September 2022.

The study will be reported in accordance with the Consolidated Standards of Reporting Trials (CONSORT) Statement 2010 and the extensions for reporting pragmatic trials, cluster randomised trials, multi-arm parallel group trials and trials on psychological interventions.<sup>33-37</sup>

This trial protocol was created according to SPIRIT guidelines.<sup>38</sup>

(please insert Figure 2 here)

### 2.2. Participants

Overall, 4,268 patients are planned to be recruited. The inclusion criteria are: a) age  $\geq$  18 years; and b) ICD-10 diagnosis of non-organic insomnia (F51.0) or insomnia (G47.0). Exclusion criteria are: a) untreated sleep apnoea syndrome (ICD-10: G47.3); b) untreated restless legs syndrome or periodic leg movement disorder (ICD-10: G25.8); c) untreated



09.10.2021, version 1.0, Spiegelhalter et al. 9

1  
2  
3 hyperthyroidism (ICD-10: E05.9); d) ongoing psychotherapy for insomnia; e) conditions that  
4 may be aggravated by CBT-I (bipolar disorder, ICD-10: F31.x; epilepsy, ICD-10: G40.x); e)  
5 conditions that pose a serious threat to treatment adherence (e.g., organic, including  
6 symptomatic, mental disorders (ICD-10: F00-F09); mental and behavioural disorders due to  
7 psychoactive substance use (ICD-10: F10-F19); schizophrenia, schizotypal and delusional  
8 disorders (ICD-10: F20-F29)); f) acute suicidality.  
9  
10  
11  
12  
13  
14

15  
16 Up to 320 GPs from Bavaria and Baden-Wuerttemberg, who participate in this study, will recruit  
17 eligible patients during consultations and check inclusion and exclusion criteria. In addition,  
18 online, print and broadcast media advertisements as well as postal mailings by the BARMER  
19 to potential patients will be used to recruit insomnia patients from all over Germany. These  
20 patients will be referred to a group of GPs that use telehealth consultations for checking  
21 inclusion and exclusion criteria, delivering step 1 of the stepped care model and guiding  
22 patients through the stepped care model. All GPs will receive remuneration for each  
23 participating patient (up to 158.25€ depending on the number of consultations). In addition to  
24 receiving free access to the stepped care model or TAU, participants will receive payment after  
25 the completion of online assessments T1 (15€), T2 (15€), and T3 (20€) to increase adherence.  
26  
27  
28  
29  
30  
31  
32  
33  
34  
35  
36  
37  
38  
39  
40

### 41 **2.3. Randomisation and allocation concealment**

42  
43  
44 This study will use cluster randomisation of GPs with an allocation ratio of 3:3:3:1  
45 (IG1:IG2:IG3:TAU). Randomisation will be performed by authors MB and MM (Ulm University)  
46 who are not otherwise involved in the trial and therefore blinded to all processes of the study.  
47  
48 Population-density stratified permuted block randomisation (nine strata based on population  
49 density and average level of income, one stratum for GPs that exclusively employ telehealth  
50 consultations) will be employed with varying block sizes concealed to the investigators to  
51 minimise selection bias. GPs from community practices will be randomised into the same trial  
52 arm. The GPs are instructed to conceal group allocation until the baseline assessment is  
53 completed by the patient.  
54  
55  
56  
57  
58  
59  
60

## 2.4. Blinding

Blinding of patients and healthcare providers is not feasible. However, screenings and baseline assessments will be performed before patients are informed about treatment assignment to avoid contamination with anticipated treatment effects. In case of non-completion of assessments participants will receive fully automated standardised reminders.

## 2.5. Intervention

The stepped care model that will be tested in the current study is presented in Figure 1.

### 2.5.1. Step 1

In step 1 of the stepped care model, the responsible GP will deliver a brief standardised psychoeducational treatment after being trained by sleep medicine specialists of the Department of Psychiatry and Psychotherapy of the Medical Center – University of Freiburg and by primary care physicians of the Department of Medicine, Division of General Practice, of the Medical Center – University of Freiburg. The treatment includes the following psychoeducational recommendations: a) avoid alcohol as a hypnotic; b) avoid clock-watching at night; c) avoid afternoon caffeine use; d) exercise regularly. In addition, the following stimulus control instructions will be given by the GPs: a) use the bed only for sleep and sexual activity; b) get out of bed when unable to sleep; c) do not nap during the day. Of note, the GPs do not use standardised leaflets that summarise the psychoeducational recommendations. GPs can also consult a psychiatrist of the Department of Psychiatry and Psychotherapy of the Medical Center – University of Freiburg whenever they feel that discontinuation of hypnotic medication would be appropriate. After four weeks, all patients in the intervention groups will receive an email with a link providing the opportunity to access step 2 of the stepped care

1  
2  
3 model without further consultation of the GPs. Importantly, for each patient, GPs can decide  
4  
5 to skip step 1 of the stepped care model if they do not expect a substantial impact on insomnia  
6  
7 severity.  
8  
9

### 10 11 12 13 **2.5.2. Step 2** 14

15  
16 At step 2 of the stepped care model, the GET.ON Institut für Online Gesundheitstrainings  
17  
18 GmbH (operating under the registered brand “HelloBetter”) will provide an internet intervention  
19  
20 based on CBT-I with an accompanying mobile sleep diary app. The intervention was initially  
21  
22 developed at Leuphana University Lüneburg by the team of author DL and was positively  
23  
24 evaluated in three randomised controlled trials.<sup>39-41</sup> Since the intervention was initially designed  
25  
26 for workers, it has been adapted and technically updated for the current study by HelloBetter  
27  
28 to meet the needs of all potential patients. Treatment content is based on CBT-I manuals and  
29  
30 includes psychoeducation, relaxation therapy, sleep restriction therapy, stimulus control  
31  
32 therapy, and cognitive interventions targeting rumination and worry. Delivery is structured into  
33  
34 eight sessions, lasting approximately 45-60 min each. Participants are instructed to complete  
35  
36 one session per week resulting in an overall duration of eight weeks. However, participants  
37  
38 are allowed to work through the sessions faster or slower accounting for interindividual  
39  
40 differences in the therapeutic process.  
41  
42  
43

44  
45 Patients of the three IGs receive an initial and a final consultation (each about 20 min) with  
46  
47 one of a team of e-coaches of HelloBetter, who are trained and supervised psychologists. The  
48  
49 consultations will be conducted by telephone, or, if this is not possible, by in-platform  
50  
51 messages. In addition to the initial and final consultation, patients randomised to the ‘standard’  
52  
53 version of the intervention (IG1) receive written feedback and support by the responsible e-  
54  
55 coach after each session. E-coaches are instructed to spend, on average, 25 min per session  
56  
57 for writing this feedback. Patients randomised to the ‘flex’ version of the intervention (IG2)  
58  
59 receive written on-demand support by the responsible e-coach. Patients randomised to the  
60  
‘basic’ version of the intervention (IG3) do not receive additional human guidance.

1  
2  
3 The treatment platform operates according to the ISO 27000 and NEN 7510 standards. All  
4 data is securely stored on ISO 27000-certified servers and transmitted via HTTPS with SSL  
5 certificates (AES-256 and SHA-1, 2048-bit RSA). Industry-standard measures have been  
6 taken to ensure robust security for the platform.  
7  
8  
9  
10

### 11 12 13 14 15 **2.5.3. Step 3**

16  
17  
18 In step 3 of the stepped care model, non-responders will be referred by their GPs to specialised  
19 medical treatment. The decision about this referral lies with the responsible GP and is based  
20 on clinical judgement of response. However, the responsible e-coach of HelloBetter will send  
21 a report to the GP summarising step 2 treatment process and outcome. This includes a post-  
22 treatment ISI score based on an ISI that participants fill in on the treatment platform outside  
23 the research process, and a recommendation about whether and by whom the treatment  
24 should be continued after step 2. As a rule of thumb, GPs are recommended to refer patients  
25 with an ISI score  $\geq 15$  and a comorbid mental health syndrome to a psychiatrist and/or a  
26 psychotherapist in step 3, and all other patients with an ISI score  $\geq 15$  to a medical doctor that  
27 is a board-certified sleep medicine specialist.  
28  
29  
30  
31  
32  
33  
34  
35  
36  
37  
38  
39  
40  
41  
42

### 43 **2.6. Treatment-as-usual**

44  
45  
46 In the TAU group, GPs are instructed to provide their routine clinical care for insomnia. This  
47 may or may not include non-pharmacological or pharmacological treatment by the GPs or  
48 referrals to specialised medical treatment. The GPs in the TAU group will not receive the  
49 specific training that is described in section 2.5.1. and will not be able to refer patients to the  
50 internet intervention described in section 2.5.2. All health care provisions in the TAU group will  
51 be retrospectively monitored with the Trimbos/iMTA questionnaire (TIC-P; see section 2.8.2.).  
52 Using these data, an accurate description of TAU can be provided.  
53  
54  
55  
56  
57  
58  
59  
60

## 2.7. Safety protocol

During the screening procedure, GPs exclude patients with acute suicidality. Suicidal ideation will also be screened by the e-coaches of HelloBetter at their initial consultations, and at T0, T1, T2, and T3 using QIDS-SR16 and NEQ (see paragraph on measures for details). Reports of current suicidal ideation in the interview, a score  $\geq 1$  on the suicide item of the QIDS-SR16 (item 12; 0 = "I do not think of suicide or death.", 1 = "I feel that life is empty or wonder if it's worth living.", 2 = "I think of suicide or death several times a week for several minutes", 3 = "I think of suicide or death several times a day in some detail, or I have made specific plans for suicide or have actually tried to take my life"), or the answer „yes“ to item 10 of the NEQ ("I got thoughts that it would be better if I did not exist anymore and that I should take my own life") will result in a standardised safety protocol. In particular, participants will receive an information document with detailed information on available health services and the advice to consult their GP. The wording of the online information document is adapted in emphasis, depending on the severity of the indicated suicidality.

## 2.8. Measures

Table 1 presents an overview of measures that are assessed in this trial.

(please insert Table 1 here)

### 2.8.1. Primary outcome measure

The primary outcome will be insomnia severity at T3, six months after the baseline assessment. Insomnia severity will be assessed with the Insomnia Severity Index (ISI<sup>42</sup>). The ISI is composed of seven 5-point Likert scale items (0-4 points; total score range: 0-28 points)

1  
2  
3 probing perceived severity of insomnia symptoms during the preceding two weeks. Several  
4 studies have shown good internal consistency of the ISI with Cronbach's Alpha ranging from  
5 0.70 to 0.90.<sup>42-44</sup>  
6  
7  
8  
9

### 10 11 12 13 **2.8.2. Secondary outcome measures** 14

15  
16 Sleep quality will be assessed using the Pittsburgh Sleep Quality Index (PSQI<sup>45</sup>), a 19-item  
17 self-report measure covering different aspects of sleep quality. The total score of the PSQI  
18 ranges from 0 to 21, internal consistency was found to be 0.80.<sup>46</sup> Quality of life will be assessed  
19 with the AQoL-8D,<sup>47</sup> an instrument composed of 35 items that measure eight dimensions  
20 (independent living, pain, senses, mental health, happiness, coping, relationships, self-worth).  
21 The AQoL-8D generates patient preference-based utilities on a scale of 0 (death) to 1 (perfect  
22 health), using the time-trade-off method,<sup>47</sup> which will be used to estimate quality-adjusted life  
23 years (QALYs) based on the area-under-the-curve (AUC) method. The AQoL-8D has been  
24 reported to have excellent internal consistency with a Cronbach's Alpha of 0.96.<sup>47</sup> Depressive  
25 symptoms will be measured using the 16-item Quick Inventory of Depressive Symptoms in the  
26 self-report format (QIDS-SR16<sup>48</sup>). The total score of the QIDS-SR16 ranges from 0 to 27,  
27 internal consistency was reported to be good (Cronbach's Alpha = 0.86).<sup>49</sup> Incident depression  
28 will be assessed in patients without a depression diagnosis at T0 and defined using a cut-off  
29 score of  $\geq 13$  on the QIDS-SR16.<sup>50</sup> Anxiety symptoms will be assessed with the 7-item General  
30 Anxiety Disorder 7 questionnaire (GAD-7<sup>51</sup>; total score 0-21; Cronbach's Alpha = 0.89<sup>52</sup>).  
31 Somatic symptoms will be measured using the 8-item Somatic Symptom Scale 8 (SSS-8<sup>53</sup>;  
32 total score 0-32; Cronbach's Alpha = 0.81). For the health-economic evaluation, health-care  
33 utilisation, patient and family expenditures and productivity losses due to absence from work  
34 or reduced efficiency during paid and unpaid work will be established with the Trimbos/iMTA  
35 questionnaire for costs associated with psychiatric illness (TiC-P), a retrospective self-report  
36 questionnaire covering the previous three months.<sup>54-56</sup> A list of unit cost prices will be used to  
37  
38  
39  
40  
41  
42  
43  
44  
45  
46  
47  
48  
49  
50  
51  
52  
53  
54  
55  
56  
57  
58  
59  
60

1  
2  
3 compute health care costs on a per-participant basis.<sup>57</sup> Test-retest reliability has previously  
4  
5 been shown to be satisfactory.<sup>55</sup>  
6  
7  
8  
9

### 10 11 **2.8.3. Intervention-related variables** 12

13  
14 At T2 after 12 weeks, the 12-item Working Alliance Inventory for guided Internet interventions  
15 (WAI-I<sup>58</sup>) and the 12-item Technological Alliance Inventory (TAI-OT) will be administered in all  
16 patients of the intervention groups (IG1, IG2, IG3) who entered step 2 of the stepped care  
17 model (internet-delivered CBT-I). The WAI-I and the TAI-OT will be used to assess the  
18 therapeutic alliance between patient and e-coach and the technological alliance between  
19 patient and e-coach and the technological alliance between client and the internet-based  
20 intervention, respectively. The WAI-I score ranges from 12 to 60 and the questionnaire has  
21 excellent internal consistency with a Cronbach's Alpha of 0.93.<sup>58</sup> The TAI-OT is a new self-  
22 report questionnaire developed by Labpsitec at Jaume I University in Castellón, Spain  
23 (Labpsitec (<http://www.labpsitec.uji.es/eng/index.php>)) and measures the degree to which the  
24 internet-based intervention is perceived as being helpful in achieving therapeutic goals. The  
25 TAI-OT score ranges from 12 to 84. Patients in all conditions will receive the 8-item Client  
26 Satisfaction Questionnaire (CSQ-8<sup>59 60</sup>; total score 8-32), which is characterised by excellent  
27 internal consistency with a Cronbach's Alpha of 0.93.<sup>59</sup> In addition, the 20-item Negative  
28 Effects Questionnaire (NEQ<sup>61</sup>) will be used in all patients. The NEQ measures the frequency,  
29 with a total score ranging from 0 to 20, and impact, with a total score ranging from 0 to 80, of  
30 possible negative effects during treatment. Its internal consistency was found to be excellent  
31 with a Cronbach's Alpha of 0.95.<sup>61</sup> Moreover, an additional self-developed 24-item  
32 Questionnaire on adverse effects of CBT-I will be used. For adverse events reported in the  
33 NEQ and the additional self-developed 24-item questionnaire, patients who entered step 2 of  
34 the stepped care model will be asked if they attribute the adverse events to the behavioural  
35 components of CBT-I. A self-developed Dropout Questionnaire based on the Health Action  
36 Process Approach (HAPA<sup>62</sup>) will be used to identify dropout reasons in participants not  
37  
38  
39  
40  
41  
42  
43  
44  
45  
46  
47  
48  
49  
50  
51  
52  
53  
54  
55  
56  
57  
58  
59  
60

1  
2  
3 completing at least 80% of the internet-delivered intervention. For a comprehensive evaluation  
4 of the implementation of the stepped care model a battery of self-developed self-report items  
5 will be used in all patients to assess the usage of and adherence to treatment components  
6 across the steps.  
7  
8  
9  
10

#### 11 12 13 14 15 **2.8.4. Potential treatment moderators and mediators**

16  
17  
18 At T0, demographic variables (e.g., age, gender), depressive and anxiety symptoms, as well  
19 as IT knowledge will be documented as potential moderators of treatment effectiveness. In  
20 addition, the baseline values of the following variables will be assessed as potential  
21 moderators: the 10-item Dysfunctional Beliefs and Attitudes about Sleep Scale  
22 (DBAS-10<sup>63 64</sup>; Cronbach's Alpha = 0.69), the 16-item Pre-Sleep Arousal Scale (PSAS<sup>65 66</sup>;  
23 Cronbach's Alpha = 0.80-0.94), the 10-item Brief Fatigue Inventory (BFI<sup>67</sup>; Cronbach's Alpha  
24 = 0.96), the 10-item Perceived Stress Scale (PSS<sup>68</sup>; Cronbach's Alpha = 0.78), the 13-item  
25 Sleep Hygiene Index (SHI<sup>69</sup>; Cronbach's Alpha = 0.66), and the 18-item short version of the  
26 Cognitive Emotion Regulation Questionnaire (CERQ-short<sup>70</sup>; Cronbach's Alpha = 0.68-0.81).  
27  
28 In addition, mediation analyses will be conducted using some of the constructs described in  
29 this section (DBAS-10, PSAS, PSS, SHI, CERQ) as well as two intervention-related variables  
30 described above (WAI-I, TAI-OT).  
31  
32  
33  
34  
35  
36  
37  
38  
39  
40  
41  
42  
43  
44  
45  
46  
47

#### 48 49 50 **2.8.5. Other data**

51  
52 Medical record data (e.g., ICD-10 diagnosis codes, treatment) will be provided by the GPs to  
53 enable allocation of patients to the four subgroups. In cases of missing medical record data,  
54 group allocation will be based on self-reported mental and somatic comorbidities. Sleep diary  
55 data will be assessed in step 2 of the stepped care model and will be used to evaluate  
56 treatment adherence, e.g., adherence to personalised sleep restriction recommendations.  
57  
58  
59  
60 Additionally, usage data from the treatment platform will be used to assess adherence to the



1  
2  
3 internet-delivered intervention. Secondary data from BARMER will be used to assess the  
4 validity of the TiC-P. In addition, qualitative interviews will be conducted with a subgroup of  
5 patients, GPs and e-coaches to assess their experience of positive and negative aspects of  
6 the stepped care model. Trained interviewers will explore acceptance, perceived effectiveness,  
7 usage behaviour, barriers, facilitators, transferability into routine care as well as side-effects of  
8 the stepped care model using semi-standardised interview guides. The sample size and  
9 composition will be planned to consider the different intervention groups and gain sufficient  
10 theoretical data saturation. All subgroups will be represented in the interviews.  
11  
12  
13  
14  
15  
16  
17  
18  
19  
20  
21  
22  
23

## 2.9. Sample size calculation

24  
25  
26 There is no universally accepted minimally important difference for the treatment of insomnia.  
27 Hence, this issue has been discussed among the clinicians involved in the current trial who  
28 are nationally and internationally leading experts in the field of insomnia research. Most  
29 clinicians agreed that 1.5 or more points on the ISI (exhibiting a common standard deviation  
30 of 6.0 points) are a reasonable minimally important difference corresponding to a minimally  
31 important effect size of  $d = 0.25$ . Based on previous research, it is assumed that all intervention  
32 groups (IG1, IG2, IG3) exhibit a considerably larger difference to the TAU group of at least  $d$   
33  $= 0.50$  (e.g., <sup>24</sup>). Because of this, for ethical reasons and to reduce costs, the sample size  
34 calculation is based on the comparisons between the IGs, and the GPs are randomised with  
35 an allocation ratio of 3:3:3:1 (IG1, IG2, IG3, TAU), which ensures sufficient power for both  
36 differences between any IG and TAU (of at least  $d = 0.35$ ) as well for differences between IGs  
37 (of at least  $d = 0.25$ ). Based on 320 GPs with a median recruitment rate of  $n = 9 \pm 14$  patients,  
38 an ICC of 0.02 (see <sup>71</sup> for comparison), a correlation of the outcome at T3 with the  
39 corresponding baseline assessment of  $r = 0.5$ ,  $d = 0.25$ , an  $\alpha$  of 0.05 and  $(1-\beta)$  of 80%, the  
40 required sample size is  $n = 1,067$  for each of the four subgroups of patients (IGs:  $n = 320$  each;  
41 TAU:  $n = 107$ ). Thus, a total sample size of  $N = 4,268$  (IGs:  $n = 1,280$  each; TAU:  $n = 428$ ) is  
42  
43  
44  
45  
46  
47  
48  
49  
50  
51  
52  
53  
54  
55  
56  
57  
58  
59  
60

1  
2  
3 required. Sampling procedures for the qualitative interviews follow theoretical data saturation  
4  
5 principles.<sup>72 73</sup>  
6  
7  
8  
9

## 10 **2.10. Statistical and qualitative analysis**

### 11 **2.10.1. Effectiveness**

12  
13  
14  
15  
16  
17 Descriptive statistics of recruitment and dropout as well as baseline characteristics for each  
18 group will be provided. The primary effectiveness analysis will be conducted according to the  
19 intention-to-treat principle based on all patients with their original treatment allocation.  
20  
21 Additionally, per-protocol analyses based on the data of patients who completed a substantial  
22 proportion of the internet intervention (i.e., 80% of the modules) will be conducted. Missing  
23 data will be handled via multiple imputation, using a multilevel imputation model to account for  
24 clustering. The effect of group allocation (IG1, IG2, IG3, TAU) on the primary endpoint ISI at  
25 T3 (6 months after baseline) will be tested using pairwise group comparisons based on linear  
26 mixed models with corresponding 95% confidence intervals. These analyses will be conducted  
27 separately for each subgroup of patients. The alpha level will be adjusted using the Bonferroni-  
28 Holm procedure. All models will include the responsible GP as a clustering variable as well as  
29 baseline insomnia severity, age, and gender as covariates. Clinical significance will be  
30 determined using Number Needed to Treat (NNT) analyses<sup>74</sup>. Additionally, reliable reduction  
31 in insomnia severity will be calculated with the Reliable Change Index (RCI) by Jacobson &  
32 Truax.<sup>75</sup> For calculating the RCI, a pre-specified Cronbach's alpha of 0.92 will be used, based  
33 on a validation study in 410 primary care patients.<sup>76</sup> Based on the RCI, participants will be  
34 categorised into responders and non-responders, and the proportion of responders will be  
35 compared between study groups (again accounting for clustering). Secondary outcomes will  
36 be analysed analogously to the primary outcome, using random effect regression models as  
37 appropriate for the respective type of data. Potential onset and remission of incident  
38 depression will be compared between study groups based on incidence rate ratios (IRR) using  
39 multilevel Poisson regression. No interim analysis is planned for effectiveness or futility.  
40  
41  
42  
43  
44  
45  
46  
47  
48  
49  
50  
51  
52  
53  
54  
55  
56  
57  
58  
59  
60

1  
2  
3 Exploratory moderator analyses will be used to investigate whether pre-treatment patient  
4 characteristics are associated with differential treatment effectiveness. Potential moderators  
5 include sociodemographic (e.g., age) and clinical (e.g., insomnia severity) variables.  
6  
7 Exploratory mediator analyses will be employed to examine potential mechanisms of change.  
8  
9 Among potential mediators are sleep-related (e. g. dysfunctional beliefs and attitudes about  
10 sleep) and intervention-related variables (e. g. working alliance).  
11  
12  
13  
14  
15  
16  
17  
18  
19

### 20 **2.10.2. Economic evaluation**

21  
22 The economic evaluation will be performed from the societal and public health care  
23 perspective. Two multilevel models (MLMs) will be specified, one for costs and one for effects,  
24 which take into account the hierarchical structure of the data. MLMs will be combined with  
25 cluster bootstrapping, which is recommended for resampling clustered data.<sup>77</sup> Across the four  
26 study groups, mean costs and QALYs will be compared to assess if any of the treatments are  
27 less effective and more expensive than the other treatments. If so, incremental cost-  
28 effectiveness ratios (ICERs) will not be estimated in relation to that treatment.<sup>78</sup> Otherwise,  
29 ICERs will be estimated by calculating the difference in costs between two treatment options  
30 divided by the difference in effectiveness of these two treatment options. We will bootstrap  
31 seemingly unrelated regression equation (SURE) models to generate 5,000 simulations of cost  
32 and effect pairs while allowing for correlated residuals of the cost and effect equations and  
33 adjusting for potential confounders.<sup>79</sup> The joint uncertainty surrounding costs and effects will  
34 be summarised using cost-effectiveness acceptability curves (CEACs) based on a net benefit  
35 regression framework.<sup>80</sup> CEACs show the probability of an intervention being cost effective in  
36 comparison with the alternatives for a range of different willingness-to-pay thresholds. For  
37 patients insured by BARMER, the validity of the TiC-P will be assessed with secondary data  
38 from the health insurance.  
39  
40  
41  
42  
43  
44  
45  
46  
47  
48  
49  
50  
51  
52  
53  
54  
55  
56  
57  
58  
59  
60

### 2.10.3. Qualitative interviews

Qualitative interviews of patients, GPs and e-coaches will be used to assess barriers and supporting factors of the stepped care model. The sample size will be determined according to the principle of theoretical saturation. Thus, data collection will continue until no further insights can be gained from additional interviews.<sup>81 82</sup> Following the principles of theoretical sampling, for the stakeholder group patients, cases will be deliberately selected based on the following criteria: remitters/non-remitters; male/female; lower/higher age; intervention-adherers (defined as completing more than 80% of the intervention within 12 weeks)/non-adherers. Additionally, care will be taken to include participants from all three IGs and the TAU group. Given the limited number of GPs and e-coaches, all participants of these stakeholder groups will be invited to the interviews.

For each stakeholder group, a semi-structured interview schedule will be prepared. The content of the interview schedules will be primarily based on the dimensions of the Hierarchical Model of Health Service Quality (i.e., interpersonal quality, technical quality, environmental quality, administrative quality)<sup>83</sup> and will be supplemented by other relevant dimensions (e.g., therapeutic alliance, adverse effects). The questions aim at exploring acceptance, perceived effectiveness, usage behaviour, barriers, facilitators, and transferability into routine care as well as adverse effects. Interviews will be 60-90 min long and will be conducted by trained and supervised psychologists. Recordings will be transcribed according to the rules for computer-assisted evaluation.<sup>84</sup> Following the principles of qualitative content analysis by Kuckartz,<sup>84</sup> text units will be systematised and classified following an inductive-deductive approach. The data analysis will be carried out using MAXQDA, a software for the analysis of qualitative data.<sup>85</sup>

### 2.11. Patient and public involvement

Representatives of patient groups were not formally involved in the design of this study but will be involved in the discussion and dissemination of results. In addition, patients were involved

1  
2  
3 in user-experience and usability testing of the platform for the internet intervention in order to  
4 ensure that the interface is user-friendly and adaptive to factors related to age, gender, and  
5 education. Public representatives approved the trial objectives and design as part of the  
6 application to the Innovationsfonds of the German Federal Joint Committee  
7  
8  
9  
10  
11  
12  
13  
14  
15

## 16 **2.12. Ethics and dissemination**

17  
18 The study has been registered in the German Clinical Trials Register  
19 ([https://www.drks.de/drks\\_web/](https://www.drks.de/drks_web/); DRKS00021503) and will be conducted in accordance with  
20 the Declaration of Helsinki. The study protocol was approved by both the Ethics Committee of  
21 the Medical Center – University of Freiburg and the Ethics Committee of the State Chamber  
22 of Physicians ('Landesärztekammer Baden-Württemberg'). In addition, the data protection  
23 officers of the Medical Center – University of Freiburg and Ulm University have approved the  
24 formal data protection concept of this study. The results of the study will be published  
25 irrespective of the outcome.  
26  
27  
28  
29  
30  
31  
32  
33  
34  
35  
36  
37  
38  
39  
40

## 41 **3. Discussion**

42  
43 Insomnia is a common, costly and impairing sleep disorder. According to clinical guidelines,  
44 the first-line therapy is CBT-I, however, only few patients with insomnia have access to this  
45 treatment. Internet-delivered CBT-I has the potential to disseminate the recommended  
46 treatment to a larger number of patients. This study will determine whether a stepped care  
47 model for insomnia that includes psychoeducational treatment by GPs, internet-delivered CBT-  
48 I and specialised medical treatment, improves insomnia severity as well as psychological and  
49 physical well-being.  
50  
51  
52  
53  
54  
55  
56  
57  
58  
59  
60

1  
2  
3 **Authors statement:** K. Spiegelhalter, D. D. Ebert, H. Baumeister, and D. Riemann conceived  
4 the project, have overall responsibility for the trial design and treatment design and drafted the  
5 trial protocol. C. Buntrock, M. Burkhardt, E. Heber, M. Kuhn, A. Maun, and M. Moshagen  
6 contributed to trial design. A. Al-Kamaly, M. Franke, L. Frase, E. Heber, K. Helm, D. Lehr, and  
7 A. Maun contributed to treatment design. H. Baumeister, M. Bader, N. Bauereiß, L. Braun, P.  
8 Dülzen, A. M. Küchler, M. Moshagen, and L. Simon are responsible for statistical analysis. C.  
9 Buntrock is responsible for economic analysis. All authors provided critical review on the trial  
10 protocol and approved the final manuscript.  
11  
12  
13  
14  
15  
16  
17  
18  
19  
20  
21  
22

23 **Funding:** The described work was supported by funding from the Innovationsfonds of the  
24 German Federal Joint Committee (Gemeinsamer Bundesausschuss/ G-BA; grant  
25 01NVF18030). The funding source had no involvement in study design, in the collection,  
26 analysis and interpretation of data, in the writing of the report, and in the decision to submit the  
27 trial protocol for publication.  
28  
29  
30  
31  
32  
33  
34  
35  
36  
37  
38  
39  
40  
41  
42  
43  
44  
45  
46  
47  
48  
49  
50  
51  
52  
53  
54  
55  
56  
57  
58  
59  
60

## References

1. Morin CM, Drake CL, Harvey AG, *et al.* Insomnia disorder. *Nat Rev Dis Primers* 2015;**1**:15026.
2. Ohayon MM. Epidemiology of insomnia: what we know and what we still need to learn. *Sleep Med Rev* 2002;**6**:97-111.
3. Shochat T, Umphress J, Israel AG, *et al.* Insomnia in primary care patients. *Sleep* 1999;**22**:S359-65.
4. Kyle SD, Morgan K, Espie CA. Insomnia and health-related quality of life. *Sleep Med Rev* 2010;**14**:69-82.
5. Hertenstein E, Feige B, Gmeiner T, *et al.* Insomnia as a predictor of mental disorders: a systematic review and meta-analysis. *Sleep Med Rev* 2019;**43**:96-105.
6. Lane JM, Jones SE, Dashti HS, *et al.* Biological and clinical insights from genetics of insomnia symptoms. *Nat Genet* 2019;**51**:387-93.
7. Li M, Zhang XW, Hou WS, *et al.* Insomnia and risk of cardiovascular disease: a meta-analysis of cohort studies. *Int J Cardiol* 2014;**176**:1044-7.
8. Qaseem A, Kansagara D, Forcica MA, *et al.* Management of chronic insomnia disorder in adults: a clinical practice guideline from the American College of Physicians. *Ann Intern Med* 2016;**165**:125-33.
9. Riemann D, Baglioni C, Bassetti C, *et al.* European guideline for the diagnosis and treatment of insomnia. *J Sleep Res* 2017;**26**:675-700.
10. Grobe TG, Steinmann S, Gerr J. *Gesundheitsreport 2019 – Schlafstörungen. Schriftenreihe zur Gesundheitsanalyse – Band 17.* BARMER, 2019.
11. Schlack R, Hapke U, Maske U, *et al.* Frequency and distribution of sleep problems and insomnia in the adult population in Germany: results of the German Health Interview and Examination Survey for Adults (DEGS1). *Bundesgesundheitsblatt Gesundheitsforschung Gesundheitsschutz* 2013;**56**:740-8.
12. Buth S, Holzbach R, Martens MS, *et al.* Problematic medication with benzodiazepines, "Z-drugs", and opioid analgesics. *Dtsch Arztebl Int* 2019;**116**:607-15.

13. Thiar H, Ebert DD, Lehr D, *et al.* Internet-based cognitive behavioral therapy for insomnia: a health economic evaluation. *Sleep* 2016;**39**:1769-78.
14. Léger D, Bayon V. Societal costs of insomnia. *Sleep Med Rev* 2010;**14**:379-89.
15. Daley M, Morin CM, LeBlanc M, *et al.* The economic burden of insomnia: direct and indirect costs for individuals with insomnia syndrome, insomnia symptoms, and good sleepers. *Sleep* 2009;**32**:55-64.
16. Ritterband LM, Thorndike FP, Gonder-Frederick L, *et al.* Efficacy of an internet-based behavioral intervention for adults with insomnia. *Arch Gen Psychiatry* 2009;**66**:692-8.
17. Ebert DD, Van Daele T, Nordgreen T, *et al.* Internet- and mobile-based psychological interventions: applications, efficacy, and potential for improving mental health: a report of the EFPA E-Health Taskforce. *Eur Psychol* 2018;**23**:167-187.
18. Zachariae R, Lyby MS, Ritterband LM, *et al.* Efficacy of internet-delivered cognitive-behavioral therapy for insomnia – a systematic review and meta-analysis of randomized controlled trials. *Sleep Med Rev* 2016;**30**:1-10.
19. Soh HL, Ho RC, Ho CS, *et al.* Efficacy of digital cognitive behavioural therapy for insomnia: a meta-analysis of randomised controlled trials. *Sleep Med* 2020;**75**:315-25.
20. Van Straten A, van der Zweerde T, Kleiboer A, *et al.* Cognitive and behavioral therapies in the treatment of insomnia: a meta-analysis. *Sleep Med Rev* 2018;**38**:3-16.
21. Blom K, Jernelov S, Ruck C, *et al.* Three-Year Follow-Up of Insomnia and Hypnotics after Controlled Internet Treatment for Insomnia. *Sleep* 2016;**39**:1267-74.
22. Ritterband LM, Thorndike FP, Ingersoll KS, *et al.* Effect of a web-based cognitive behavior therapy for insomnia intervention with 1-year follow-up: a randomized clinical trial. *JAMA Psychiatry* 2017;**74**:68-75.
23. Cheung JM, Jarrin DC, Ballot O, *et al.* A systematic review of cognitive behavioral therapy for insomnia implemented in primary care and community settings. *Sleep Med Rev* 2019;**44**:23-36.



- 1
  - 2
  - 3
  - 4
  - 5
  - 6
  - 7
  - 8
  - 9
  - 10
  - 11
  - 12
  - 13
  - 14
  - 15
  - 16
  - 17
  - 18
  - 19
  - 20
  - 21
  - 22
  - 23
  - 24
  - 25
  - 26
  - 27
  - 28
  - 29
  - 30
  - 31
  - 32
  - 33
  - 34
  - 35
  - 36
  - 37
  - 38
  - 39
  - 40
  - 41
  - 42
  - 43
  - 44
  - 45
  - 46
  - 47
  - 48
  - 49
  - 50
  - 51
  - 52
  - 53
  - 54
  - 55
  - 56
  - 57
  - 58
  - 59
  - 60
24. Van der Zweerde T, Lancee J, Slottje P, *et al.* Nurse-guided internet-delivered cognitive behavioral therapy for insomnia in general practice: results from a pragmatic randomized clinical trial. *Psychother Psychosom* 2020;**89**:174-84.
25. Espie CA. "Stepped care": a health technology solution for delivering cognitive behavioral therapy as first line insomnia treatment. *Sleep* 2009;**32**:1549-58.
26. Salomonsson S, Santoft F, Lindsäter, *et al.* Stepped care in primary care – guided self-help and face-to-face cognitive behavioural therapy for common mental disorders: a randomized controlled trial. *Psychol Med* 2018;**48**:1644-54.
27. Forsell E, Jernelöv S, Blom K, *et al.* Proof of concept for an adaptive treatment strategy to prevent failures in internet-delivered CBT-I: a single-blind randomized clinical trial with insomnia patients. *Am J Psychiatry* 2019;**176**:315-23.
28. Zhou ES, Michaud AL, Recklitis CJ. Developing efficient and effective behavioral treatment for insomnia in cancer survivors: results of a stepped care trial. *Cancer* 2020;**126**:165-73.
29. Baumeister H, Reichler L, Munzinger M, *et al.* The impact of guidance on internet-based mental health interventions – a systematic review. *Internet Interv* 2014;**1**:205-15.
30. Espie CA, Kyle SD, Williams C, *et al.* A randomized, placebo-controlled trial of online cognitive behavioral therapy for chronic insomnia disorder delivered via an automated media-rich web application. *Sleep* 2012;**35**:769-81.
31. Espie CA, Emsley R, Kyle SD, *et al.* Effect of digital cognitive-behavioral therapy for insomnia on health, psychological well-being, and sleep-related quality of life: a randomized clinical trial. *JAMA Psychiatry* 2019;**76**:21-30.
32. Lancee J, van den Bout J, Sorbi MJ, *et al.* Motivational support provided via email improves the effectiveness of internet-delivered self-help treatment for insomnia: a randomized trial. *Behav Res Ther* 2013;**51**:797-805.
33. Zwarenstein M, Treweek S, Gagnier JJ, *et al.* Pragmatic Trials in Healthcare (Practihc) group. Improving the reporting of pragmatic trials: an extension of the CONSORT statement. *BMJ* 2008;**337**:a2390.

- 1
- 2
- 3 34. Schulz KF, Altman DG, Moher D. CONSORT 2010 statement: updated guidelines for
- 4 reporting parallel group randomised trials. PLoS Med 2010;**7**:e1000251.
- 5
- 6
- 7 35. Campbell MK, Piaggio G, Elbourne DR, *et al.* Consort 2010 statement: extension to
- 8 cluster randomised trials. BMJ 2012;**345**:e5661.
- 9
- 10
- 11
- 12
- 13 36. Montgomery P, Grant S, Mayo-Wilson E, *et al.* Reporting randomised trials of social and
- 14 psychological interventions: the CONSORT-SPI 2018 extension. Trials 2018;**19**:407.
- 15
- 16 37. Juszczak E, Altman DG, Hopewell S, *et al.* Reporting of multi-arm parallel-group
- 17 randomized trials: extension of the CONSORT 2010 statement. JAMA 2019;**321**:1610-
- 18 20.
- 19
- 20
- 21
- 22
- 23 38. Chan AW, Tetzlaff JM, Altman DG, *et al.* SPIRIT 2013 statement: defining standard
- 24 protocol items for clinical trials. Ann Intern Med 2013;**158**:200-7.
- 25
- 26 39. Thiart H, Lehr D, Ebert DD, *et al.* Log in and breathe out: internet-based recovery training
- 27 for sleepless employees with work-related strain – results of a randomized controlled
- 28 trial. Scand J Work Environ Health 2015;**41**:164-74.
- 29
- 30
- 31 40. Ebert DD, Berking M, Thiart H, *et al.* Restoring depleted resources: efficacy and
- 32 mechanisms of change of an internet-based unguided recovery training for better sleep
- 33 and psychological detachment from work. Health Psychol 2015;**34S**:1240-51.
- 34
- 35 41. Behrendt D, Ebert DD, Spiegelhalter K, *et al.* Efficacy of a self-help web-based recovery
- 36 training in improving sleep in workers: randomized controlled trial in the general working
- 37 population. J Med Internet Res 2020;**22**:e13346.
- 38
- 39
- 40 42. Bastien CH, Vallières A, Morin CM. Validation of the Insomnia Severity Index as an
- 41 outcome measure for insomnia research. Sleep Med 2001;**2**:297-307.
- 42
- 43 43. Morin CM, Belleville G, Belanger L, *et al.* The Insomnia Severity Index: psychometric
- 44 indicators to detect insomnia cases and evaluate treatment response. Sleep
- 45 2011;**34**:601-8.
- 46
- 47 44. Gagnon C, Bélanger L, Ivers H, *et al.* Validation of the Insomnia Severity Index in primary
- 48 care. J Am Board Fam Med 2013;**26**:701-10.
- 49
- 50
- 51
- 52
- 53
- 54
- 55
- 56
- 57
- 58
- 59
- 60

- 1
- 2
- 3 45. Buysse DJ, Reynolds CF 3<sup>rd</sup>, Monk TH, *et al.* The Pittsburgh Sleep Quality Index: a new
- 4 instrument for psychiatric practice and research. *Psychiatry Res* 1989;**28**:193-213.
- 5
- 6
- 7 46. Carpenter JS, Andrykowski MA. Psychometric evaluation of the Pittsburgh Sleep Quality
- 8 Index. *J Psychosom Res* 1998;**45**:5-13.
- 9
- 10
- 11 47. Richardson J, Iezzi A, Khan MA, *et al.* Validity and reliability of the Assessment of Quality
- 12 of Life (AQoL)-8D multi-attribute utility instrument. *Patient* 2014;**7**:85-96.
- 13
- 14
- 15 48. Rush AJ, Trivedi MH, Ibrahim HM, *et al.* The 16-item Quick Inventory of Depressive
- 16 Symptomatology (QIDS), clinician rating (QIDS-C), and self-report (QIDS-SR): a
- 17 psychometric evaluation in patients with chronic major depression. *Biol Psychiatry*
- 18 2003;**54**:573-83.
- 19
- 20
- 21
- 22
- 23
- 24 49. Trujols J, de Diego-Adelino J, Feliu-Soler A, *et al.* Looking into the effect of multi-item
- 25 symptom domains on psychometric characteristics of the Quick Inventory of Depressive
- 26 Symptomatology-Self Report (QIDS-SR16). *Psychiatry Res* 2018;**267**:126-30.
- 27
- 28
- 29
- 30 50. Lamoureux BE, Linardatos E, Fresco DM, *et al.* Using the QIDS-SR16 to identify major
- 31 depressive disorder in primary care medical patients. *Behav Ther* 2010;**41**:423-31.
- 32
- 33
- 34 51. Spitzer RL, Kroenke K, Williams JB, *et al.* A brief measure for assessing generalized
- 35 anxiety disorder: the GAD-7. *Arch Intern Med* 2006;**166**:1092-7.
- 36
- 37
- 38
- 39 52. Löwe B, Decker O, Müller S, *et al.* Validation and standardization of the generalized
- 40 anxiety disorder screener (GAD-7) in the general population. *Med Care* 2008;**46**:266-74.
- 41
- 42
- 43 53. Gierk B, Kohlmann S, Kroenke K, *et al.* The somatic symptom scale-8 (SSS-8): a brief
- 44 measure of somatic symptom burden. *JAMA Intern Med* 2014;**174**:399-407.
- 45
- 46
- 47 54. Hakkaart-van Roijen L, van Straten A, Donker M, Tiemens B. Manual Trimbos/iMTA
- 48 questionnaire for costs associated with psychiatric illness (TiC-P). Erasmus University:
- 49 2002.
- 50
- 51
- 52
- 53 55. Bouwmans C, De Jong K, Timman R, Zijlstra-Vlasveld M, Van der Feltz-Cornelis C, Tan
- 54 Swan S, Hakkaart-van Roijen L. Feasibility, reliability and validity of a questionnaire on
- 55 healthcare consumption and productivity loss in patients with a psychiatric disorder (TiC-
- 56 P). *BMC Health Serv Res* 2013;**13**:217.
- 57
- 58
- 59
- 60

- 1  
2  
3 56. Buntrock C, Lehr D, Smit F, Horvath H, Berking M, Spiegelhalter K, Riper H, Ebert DD.  
4  
5 Guided internet-based cognitive behavioral therapy for insomnia: health-economic  
6  
7 evaluation from the societal and public health care perspective alongside a randomized  
8  
9 controlled trial. *J Med Internet Res* 2021;**23**:e25609.  
10
- 11 57. Bock JO, Brettschneider C, Seidl H, *et al.* Ermittlung standardisierter Bewertungssätze  
12  
13 aus gesellschaftlicher Perspektive für die gesundheitsökonomische Evaluation.  
14  
15 *Gesundheitswesen* 2015;**77**:53-61.  
16
- 17 58. Gómez Penedo JM, Berger T, Grosse Holtforth M, *et al.* The Working Alliance Inventory  
18  
19 for guided Internet interventions (WAI-I). *J Clin Psychol* 2020;**76**:973-86.  
20
- 21 59. Attkisson CC, Zwick R. The Client Satisfaction Questionnaire. Psychometric properties  
22  
23 and correlations with service utilization and psychotherapy outcome. *Eval Program Plann*  
24  
25 1982;**5**:233-7.  
26
- 27 60. Boß L, Lehr D, Reis D, *et al.* Reliability and validity of assessing user satisfaction with  
28  
29 web-based health interventions. *J Med Internet Res* 2016;**18**:e234.  
30
- 31 61. Rozental A, Kottorp A, Forsström D, *et al.* The Negative Effects Questionnaire:  
32  
33 psychometric properties of an instrument for assessing negative effects in psychological  
34  
35 treatments. *Behav Cogn Psychother* 2019;**47**:559-72.  
36
- 37 62. Schwarzer R. *Self-efficacy. Thought control of action.* New York: Taylor & Francis, 1992.  
38
- 39 63. Morin CM, Stone J, Trinkle D, *et al.* Dysfunctional beliefs and attitudes about sleep  
40  
41 among older adults with and without insomnia complaints. *Psychol Aging* 1993;**8**:463-7.  
42
- 43 64. Espie CA, Inglis SJ, Harvey L, *et al.* Insomniacs' attributions. Psychometric properties of  
44  
45 the Dysfunctional Beliefs and Attitudes about Sleep Scale and the Sleep Disturbance  
46  
47 Questionnaire. *J Psychosom Res* 2000;**48**:141-8.  
48
- 49 65. Nicassio PM, Mendlowitz DR, Fussell JJ, *et al.* The phenomenology of the pre-sleep  
50  
51 state: the development of the pre-sleep arousal scale. *Behav Res Ther* 1985;**23**:263-71.  
52
- 53 66. Giesemann A, de Jong-Meyer R, Pietrowsky R. Kognitive und körperliche Erregung in  
54  
55 der Phase vor dem Einschlafen. Die deutsche Version der Pre-Sleep Arousal Scale  
56  
57 (PSAS). *Z Klin Psychol Psychother* 2012;**41**:73-80.  
58  
59  
60

09.10.2021, version 1.0, Spiegelhalter et al. 29

- 1  
2  
3 67. Mendoza TR, Wang XS, Cleeland CS, *et al.* The rapid assessment of fatigue severity in  
4 cancer patients: use of the Brief Fatigue Inventory. *Cancer* 1999;**85**:1186-96.
- 5  
6  
7 68. Cohen S, Kamarck T, Mermelstein R. A global measure of perceived stress. *J Health*  
8  
9  
10  
11  
12  
13  
14  
15  
16  
17  
18  
19  
20  
21  
22  
23  
24  
25  
26  
27  
28  
29  
30  
31  
32  
33  
34  
35  
36  
37  
38  
39  
40  
41  
42  
43  
44  
45  
46  
47  
48  
49  
50  
51  
52  
53  
54  
55  
56  
57  
58  
59  
60  
60 69. Mastin DF, Bryson J, Corwyn R. Assessment of sleep hygiene using the sleep hygiene  
index. *J Behav Med* 2006;**29**:223–7.
70. Garnefski N, Kraaij V. Cognitive emotion regulation questionnaire – development of a  
short 18-item version (CERQ-short). *Pers Individ Differ* 2006;**41**:1045-53.
71. Adams G, Gulliford MC, Ukoumunne OC, *et al.* Patterns of intra-cluster correlation from  
primary care research to inform study designs and analysis. *J Clin Epidemiol*  
2004;**57**:785-94.
72. Aldiabat KM, Le Navenec CL. Data saturation: the mysterious step in grounded theory  
methodology. *Qual Rep* 2018;**23**:245-61.
73. Francis JJ, Johnston M, Robertson C, *et al.* What is an adequate sample size?  
Operationalising data saturation for theory-based interview studies. *Psychol Health*  
2010;**25**:1229-45.
74. Laupacis A, Sackett DL, Roberts RS. An assessment of clinically useful measures of the  
consequences of treatment. *N Engl J Med* 1988;**318**:1728-33.
75. Jacobson NS, Truax P. Clinical significance: a statistical approach to defining meaningful  
change in psychotherapy research. *J Consult Clin Psychol* 1991;**59**:12-9.
76. Gagnon C, Bélanger L, Ivers H, Morin CM. Validation of the Insomnia Severity Index in  
primary care. *J Am Board Fam Med* 2013;**26**:701-10. 77. Ren S, Lai H, Tong W, *et al.*  
Nonparametric bootstrapping for hierarchical data. *J Appl Stat* 2010;**37**:1487-98.
78. Glick HA, Doshi JA, Sonnad SS, Polsky D. *Economic evaluation in clinical trials*. Oxford:  
Oxford University Press, 2007.
79. Willan AR, Briggs AH, Hoch JS. Regression methods for covariate adjustment and  
subgroup analysis for non-censored cost-effectiveness data. *Health Econ* 2004;**13**:461-  
75.

- 1  
2  
3 80. Hoch JS, Rockx MA, Krahn AD. Using the net benefit regression framework to construct  
4 cost-effectiveness acceptability curves: an example using data from a trial of external  
5 loop recorders versus Holter monitoring for ambulatory monitoring of “community  
6 acquired” syncope. *BMC Health Serv Res* 2006;**6**:68.  
7  
8  
9  
10  
11 81. Patton MQ. *Qualitative Research & Evaluation Methods (3rd ed.)*. Thousand Oaks:  
12 Sage, 2002.  
13  
14  
15 82. Sandelowski M. Sample size in qualitative research. *Res Nurs Health* 1995;**18**:179-83.  
16  
17 83. Dagger TS, Sweeney JC, Johnson LW. A hierarchical model of health service quality:  
18 scale development and investigation of an integrated model. *J Serv Res* 2007;**10**:123-  
19 42.  
20  
21  
22  
23  
24 84. Kuckartz U. *Qualitative Inhaltsanalyse. Methoden, Praxis, Computerunterstützung*. Beltz  
25 Juventa, 2018.  
26  
27  
28  
29 85. Rädiker S, Kuckartz U. *Analyse qualitativer Daten mit MAXQDA. Text, Audio und*  
30 *Video*. Springer VS, 2019.  
31  
32  
33  
34  
35  
36  
37  
38  
39  
40  
41  
42  
43  
44  
45  
46  
47  
48  
49  
50  
51  
52  
53  
54  
55  
56  
57  
58  
59  
60

## Figure Legends

**Figure 1:** Stepped care model for insomnia that will be tested in the current trial. CBT-I: cognitive-behavioural treatment for insomnia; GPs: general practitioners.

**Figure 2:** IG1: intervention group 1 ('standard' version of step 2 of the stepped care model); IG2: intervention group 2 ('flex' version of step 2 of the stepped care model); IG3: intervention group 3 ('basic' version of step 2 of the stepped care model); TAU: treatment-as-usual; W: weeks; M: months; ITT: intention-to-treat.

**Table 1:** Overview of the assessments. <sup>1</sup> The ISI at T3 (6 months after T0) is the primary outcome of this trial; <sup>2</sup> only in patients of the intervention groups (IG1, IG2, IG3) who entered step 2 of the stepped care model; <sup>3</sup> only in patients of the intervention groups (IG1, IG2, IG3) not completing at least 80% of the internet-delivered intervention. ISI: Insomnia Severity Index; PSQI: Pittsburgh Sleep Quality Index; AQoL-8D: Assessment of Quality of Life instrument; QIDS-SR16: Quick Inventory of Depressive Symptoms in the self-report format; GAD-7: General Anxiety Disorder 7 questionnaire; SSS-8: Somatic Symptom Scale 8; TiC-P: Trimbos/iMTA questionnaire for costs associated with psychiatric illness; DBAS-10: Dysfunctional Beliefs and Attitudes about Sleep Scale; PSAS: Pre-Sleep Arousal Scale; BFI: Brief Fatigue Inventory; PSS: Perceived Stress Scale; SHI: Sleep Hygiene Index; CERQ-short: Cognitive Emotion Regulation Questionnaire; WAI-I: Working Alliance Inventory for guided Internet interventions; TAI-OT: Technological Alliance Inventory; CSQ-8: Client Satisfaction Questionnaire; NEQ: Negative Effects Questionnaire.

| Activity/Assessment                                                                  | T-1       | T0                | T1               | T2                | T3                |
|--------------------------------------------------------------------------------------|-----------|-------------------|------------------|-------------------|-------------------|
|                                                                                      | Pre-study | Baseline (week 0) | 4 weeks after T0 | 12 weeks after T0 | 6 months after T0 |
| Eligibility screen                                                                   | X         |                   |                  |                   |                   |
| Informed consent                                                                     | X         |                   |                  |                   |                   |
| <b>Primary outcome</b>                                                               |           |                   |                  |                   |                   |
| Insomnia severity (ISI)                                                              |           | X                 | X                | X                 | X <sup>1</sup>    |
| <b>Secondary outcomes</b>                                                            |           |                   |                  |                   |                   |
| Sleep quality (PSQI)                                                                 |           | X                 | X                | X                 | X                 |
| Quality of life (AQoL-8D)                                                            |           | X                 | X                | X                 | X                 |
| Depressive symptoms (QIDS-SR16)                                                      |           | X                 | X                | X                 | X                 |
| Anxiety symptoms (GAD-7)                                                             |           | X                 | X                | X                 | X                 |
| Somatic symptoms (SSS-8)                                                             |           | X                 | X                | X                 | X                 |
| Costs (TiC-P)                                                                        |           | X                 |                  | X                 | X                 |
| <b>Potential treatment moderators and mediators</b>                                  |           |                   |                  |                   |                   |
| Dysfunctional beliefs and attitudes about sleep (DBAS-10)                            |           | X                 | X                | X                 | X                 |
| Pre-sleep arousal (PSAS)                                                             |           | X                 | X                | X                 | X                 |
| Fatigue (BFI)                                                                        |           | X                 | X                | X                 | X                 |
| Stress (PSS)                                                                         |           | X                 | X                | X                 | X                 |
| Sleep hygiene behaviour (SHI)                                                        |           | X                 | X                | X                 | X                 |
| Emotion regulation (CERQ-short)                                                      |           | X                 | X                | X                 | X                 |
| <b>Intervention-related variables</b>                                                |           |                   |                  |                   |                   |
| Alliance (WAI-I)                                                                     |           |                   |                  | X <sup>2</sup>    |                   |
| Technological alliance (TAI-OT)                                                      |           |                   |                  | X <sup>2</sup>    |                   |
| Client satisfaction (CSQ-8)                                                          |           |                   |                  |                   | X                 |
| Adverse events and negative effects (NEQ, Questionnaire on adverse effects of CBT-I) |           |                   |                  | X                 | X                 |
| Dropout Questionnaire                                                                |           |                   |                  | X <sup>3</sup>    |                   |



1  
2  
3  
4  
5  
6  
7  
8  
9  
10  
11  
12  
13  
14  
15  
16  
17  
18  
19  
20  
21  
22  
23  
24  
25  
26  
27  
28  
29  
30  
31



**Step 3**



**Step 2**



**Step 1**

Enrollment

Assessed for eligibility

Excluded

- Not meeting inclusion criteria
- Declined to participate

Randomisation  
(n = 320 cluster)

Allocation

Allocated to IG1  
96 cluster  
1280 patients

Allocated to IG2  
96 cluster  
1280 patients

Allocated to IG3  
96 cluster  
1280 patients

Allocated to TAU  
32 cluster  
428 patients

Assessments

T0 (baseline)  
T1 (T0 + 4 W)  
T2 (T0 + 12 W)  
T3 (T0 + 6 M)

T0 (baseline)  
T1 (T0 + 4 W)  
T2 (T0 + 12 W)  
T3 (T0 + 6 M)

T0 (baseline)  
T1 (T0 + 4 W)  
T2 (T0 + 12 W)  
T3 (T0 + 6 M)

T0 (baseline)  
T1 (T0 + 4 W)  
T2 (T0 + 12 W)  
T3 (T0 + 6 M)

Analysis

ITT analysis

ITT analysis

ITT analysis

ITT analysis

1  
2  
3  
4  
5  
6  
7  
8  
9  
10  
11  
12  
13  
14  
15  
16  
17  
18  
19  
20  
21  
22  
23  
24  
25  
26  
27  
28  
29  
30  
31  
32  
33  
34  
35  
36  
37  
38  
39  
40  
41

# Reporting checklist for protocol of a clinical trial.

Based on the SPIRIT guidelines.

## Instructions to authors

Complete this checklist by entering the page numbers from your manuscript where readers will find each of the items listed below.

Your article may not currently address all the items on the checklist. Please modify your text to include the missing information. If you are certain that an item does not apply, please write "n/a" and provide a short explanation.

Upload your completed checklist as an extra file when you submit to a journal.

In your methods section, say that you used the SPIRIT reporting guidelines, and cite them as:

Chan A-W, Tetzlaff JM, Gøtzsche PC, Altman DG, Mann H, Berlin J, Dickersin K, Hróbjartsson A, Schulz KF, Parulekar WR, Krleža-Jerić K, Laupacis A, Moher D. SPIRIT 2013 Explanation and Elaboration: Guidance for protocols of clinical trials. *BMJ*. 2013;346:e7586

|                                   | Reporting Item                                                                                                                  | Page Number |
|-----------------------------------|---------------------------------------------------------------------------------------------------------------------------------|-------------|
| <b>Administrative information</b> |                                                                                                                                 |             |
| Title                             | <a href="#">#1</a> Descriptive title identifying the study design, population, interventions, and, if applicable, trial acronym | 1           |
| Trial registration                | <a href="#">#2a</a> Trial identifier and registry name. If not yet                                                              | 3           |

|    |                     |                                                                         |      |
|----|---------------------|-------------------------------------------------------------------------|------|
| 1  |                     | registered, name of intended registry                                   |      |
| 2  |                     |                                                                         |      |
| 3  |                     |                                                                         |      |
| 4  | Trial registration: | <a href="#">#2b</a> All items from the World Health Organization Trial  | n/a  |
| 5  |                     |                                                                         |      |
| 6  | data set            | Registration Data Set                                                   |      |
| 7  |                     |                                                                         |      |
| 8  |                     |                                                                         |      |
| 9  | Protocol version    | <a href="#">#3</a> Date and version identifier                          | 1-30 |
| 10 |                     |                                                                         |      |
| 11 |                     |                                                                         |      |
| 12 | Funding             | <a href="#">#4</a> Sources and types of financial, material, and other  | 20   |
| 13 |                     |                                                                         |      |
| 14 |                     | support                                                                 |      |
| 15 |                     |                                                                         |      |
| 16 |                     |                                                                         |      |
| 17 | Roles and           | <a href="#">#5a</a> Names, affiliations, and roles of protocol          | 1    |
| 18 |                     |                                                                         |      |
| 19 | responsibilities:   | contributors                                                            |      |
| 20 |                     |                                                                         |      |
| 21 | contributorship     |                                                                         |      |
| 22 |                     |                                                                         |      |
| 23 |                     |                                                                         |      |
| 24 |                     |                                                                         |      |
| 25 | Roles and           | <a href="#">#5b</a> Name and contact information for the trial sponsor  | 1    |
| 26 |                     |                                                                         |      |
| 27 | responsibilities:   |                                                                         |      |
| 28 |                     |                                                                         |      |
| 29 | sponsor contact     |                                                                         |      |
| 30 |                     |                                                                         |      |
| 31 | information         |                                                                         |      |
| 32 |                     |                                                                         |      |
| 33 |                     |                                                                         |      |
| 34 |                     |                                                                         |      |
| 35 | Roles and           | <a href="#">#5c</a> Role of study sponsor and funders, if any, in study | 20   |
| 36 |                     |                                                                         |      |
| 37 | responsibilities:   | design; collection, management, analysis, and                           |      |
| 38 |                     |                                                                         |      |
| 39 | sponsor and funder  | interpretation of data; writing of the report; and the                  |      |
| 40 |                     |                                                                         |      |
| 41 |                     | decision to submit the report for publication,                          |      |
| 42 |                     |                                                                         |      |
| 43 |                     | including whether they will have ultimate authority                     |      |
| 44 |                     |                                                                         |      |
| 45 |                     | over any of these activities                                            |      |
| 46 |                     |                                                                         |      |
| 47 |                     |                                                                         |      |
| 48 |                     |                                                                         |      |
| 49 | Roles and           | <a href="#">#5d</a> Composition, roles, and responsibilities of the     | 8    |
| 50 |                     |                                                                         |      |
| 51 | responsibilities:   | coordinating centre, steering committee, endpoint                       |      |
| 52 |                     |                                                                         |      |
| 53 | committees          | adjudication committee, data management team,                           |      |
| 54 |                     |                                                                         |      |
| 55 |                     | and other individuals or groups overseeing the                          |      |
| 56 |                     |                                                                         |      |
| 57 |                     |                                                                         |      |
| 58 |                     |                                                                         |      |
| 59 |                     |                                                                         |      |
| 60 |                     |                                                                         |      |

1 trial, if applicable (see Item 21a for data monitoring  
2  
3 committee)  
4

5  
6 **Introduction**  
7

8  
9 Background and [#6a](#) Description of research question and justification 5-6  
10  
11 rationale for undertaking the trial, including summary of  
12 relevant studies (published and unpublished)  
13  
14 examining benefits and harms for each  
15  
16 intervention  
17  
18

19  
20  
21 Background and [#6b](#) Explanation for choice of comparators 6-7  
22  
23 rationale: choice of  
24 comparators  
25  
26  
27

28 Objectives [#7](#) Specific objectives or hypotheses 7  
29  
30

31  
32 Trial design [#8](#) Description of trial design including type of trial 8  
33  
34 (eg, parallel group, crossover, factorial, single  
35 group), allocation ratio, and framework (eg,  
36 superiority, equivalence, non-inferiority,  
37 exploratory)  
38  
39  
40  
41  
42  
43

44 **Methods:**  
45

46 **Participants,**  
47  
48 **interventions, and**  
49  
50 **outcomes**  
51  
52

53  
54 Study setting [#9](#) Description of study settings (eg, community clinic, 9  
55 academic hospital) and list of countries where data  
56  
57  
58  
59

|    |                      |                                                                             |       |
|----|----------------------|-----------------------------------------------------------------------------|-------|
| 1  |                      | will be collected. Reference to where list of study                         |       |
| 2  |                      |                                                                             |       |
| 3  |                      | sites can be obtained                                                       |       |
| 4  |                      |                                                                             |       |
| 5  |                      |                                                                             |       |
| 6  | Eligibility criteria | <a href="#">#10</a> Inclusion and exclusion criteria for participants. If   | 9     |
| 7  |                      |                                                                             |       |
| 8  |                      | applicable, eligibility criteria for study centres and                      |       |
| 9  |                      |                                                                             |       |
| 10 |                      | individuals who will perform the interventions (eg,                         |       |
| 11 |                      |                                                                             |       |
| 12 |                      | surgeons, psychotherapists)                                                 |       |
| 13 |                      |                                                                             |       |
| 14 |                      |                                                                             |       |
| 15 |                      |                                                                             |       |
| 16 | Interventions:       | <a href="#">#11a</a> Interventions for each group with sufficient detail to | 10-12 |
| 17 |                      |                                                                             |       |
| 18 | description          | allow replication, including how and when they will                         |       |
| 19 |                      |                                                                             |       |
| 20 |                      | be administered                                                             |       |
| 21 |                      |                                                                             |       |
| 22 |                      |                                                                             |       |
| 23 | Interventions:       | <a href="#">#11b</a> Criteria for discontinuing or modifying allocated      | 12-13 |
| 24 |                      |                                                                             |       |
| 25 | modifications        | interventions for a given trial participant (eg, drug                       |       |
| 26 |                      |                                                                             |       |
| 27 |                      | dose change in response to harms, participant                               |       |
| 28 |                      | request, or improving / worsening disease)                                  |       |
| 29 |                      |                                                                             |       |
| 30 |                      |                                                                             |       |
| 31 |                      |                                                                             |       |
| 32 |                      |                                                                             |       |
| 33 | Interventions:       | <a href="#">#11c</a> Strategies to improve adherence to intervention        | 15,17 |
| 34 |                      |                                                                             |       |
| 35 | adherence            | protocols, and any procedures for monitoring                                |       |
| 36 |                      |                                                                             |       |
| 37 |                      | adherence (eg, drug tablet return; laboratory tests)                        |       |
| 38 |                      |                                                                             |       |
| 39 |                      |                                                                             |       |
| 40 |                      |                                                                             |       |
| 41 | Interventions:       | <a href="#">#11d</a> Relevant concomitant care and interventions that       | 9,11  |
| 42 |                      |                                                                             |       |
| 43 | concomitant care     | are permitted or prohibited during the trial                                |       |
| 44 |                      |                                                                             |       |
| 45 |                      |                                                                             |       |
| 46 | Outcomes             | <a href="#">#12</a> Primary, secondary, and other outcomes, including       | 13-16 |
| 47 |                      |                                                                             |       |
| 48 |                      | the specific measurement variable (eg, systolic                             |       |
| 49 |                      |                                                                             |       |
| 50 |                      | blood pressure), analysis metric (eg, change from                           |       |
| 51 |                      |                                                                             |       |
| 52 |                      | baseline, final value, time to event), method of                            |       |
| 53 |                      |                                                                             |       |
| 54 |                      | aggregation (eg, median, proportion), and time                              |       |
| 55 |                      |                                                                             |       |
| 56 |                      | point for each outcome. Explanation of the clinical                         |       |
| 57 |                      |                                                                             |       |
| 58 |                      |                                                                             |       |
| 59 |                      |                                                                             |       |
| 60 |                      |                                                                             |       |

|    |                           |                                                                        |           |
|----|---------------------------|------------------------------------------------------------------------|-----------|
| 1  |                           | relevance of chosen efficacy and harm outcomes                         |           |
| 2  |                           |                                                                        |           |
| 3  |                           | is strongly recommended                                                |           |
| 4  |                           |                                                                        |           |
| 5  |                           |                                                                        |           |
| 6  | Participant timeline      | <a href="#">#13</a> Time schedule of enrolment, interventions          | 10-12, 30 |
| 7  |                           | (including any run-ins and washouts),                                  |           |
| 8  |                           | assessments, and visits for participants. A                            |           |
| 9  |                           | schematic diagram is highly recommended (see                           |           |
| 10 |                           | Figure)                                                                |           |
| 11 |                           |                                                                        |           |
| 12 |                           |                                                                        |           |
| 13 |                           |                                                                        |           |
| 14 |                           |                                                                        |           |
| 15 |                           |                                                                        |           |
| 16 |                           |                                                                        |           |
| 17 |                           |                                                                        |           |
| 18 | Sample size               | <a href="#">#14</a> Estimated number of participants needed to         | 17        |
| 19 |                           | achieve study objectives and how it was                                |           |
| 20 |                           | determined, including clinical and statistical                         |           |
| 21 |                           | assumptions supporting any sample size                                 |           |
| 22 |                           | calculations                                                           |           |
| 23 |                           |                                                                        |           |
| 24 |                           |                                                                        |           |
| 25 |                           |                                                                        |           |
| 26 |                           |                                                                        |           |
| 27 |                           |                                                                        |           |
| 28 |                           |                                                                        |           |
| 29 |                           |                                                                        |           |
| 30 | Recruitment               | <a href="#">#15</a> Strategies for achieving adequate participant      | 9         |
| 31 |                           | enrolment to reach target sample size                                  |           |
| 32 |                           |                                                                        |           |
| 33 |                           |                                                                        |           |
| 34 |                           |                                                                        |           |
| 35 | <b>Methods:</b>           |                                                                        |           |
| 36 |                           |                                                                        |           |
| 37 |                           |                                                                        |           |
| 38 | <b>Assignment of</b>      |                                                                        |           |
| 39 |                           |                                                                        |           |
| 40 | <b>interventions (for</b> |                                                                        |           |
| 41 |                           |                                                                        |           |
| 42 | <b>controlled trials)</b> |                                                                        |           |
| 43 |                           |                                                                        |           |
| 44 |                           |                                                                        |           |
| 45 | Allocation:               | <a href="#">#16a</a> Method of generating the allocation sequence (eg, | 9-10      |
| 46 |                           | computer-generated random numbers), and list of                        |           |
| 47 | sequence                  | any factors for stratification. To reduce                              |           |
| 48 |                           | predictability of a random sequence, details of any                    |           |
| 49 | generation                | planned restriction (eg, blocking) should be                           |           |
| 50 |                           | provided in a separate document that is                                |           |
| 51 |                           |                                                                        |           |
| 52 |                           |                                                                        |           |
| 53 |                           |                                                                        |           |
| 54 |                           |                                                                        |           |
| 55 |                           |                                                                        |           |
| 56 |                           |                                                                        |           |
| 57 |                           |                                                                        |           |
| 58 |                           |                                                                        |           |
| 59 |                           |                                                                        |           |
| 60 |                           |                                                                        |           |

|    |                        |                                                                          |                    |
|----|------------------------|--------------------------------------------------------------------------|--------------------|
| 1  |                        | unavailable to those who enrol participants or                           |                    |
| 2  |                        |                                                                          |                    |
| 3  |                        | assign interventions                                                     |                    |
| 4  |                        |                                                                          |                    |
| 5  |                        |                                                                          |                    |
| 6  | Allocation             | <a href="#">#16b</a> Mechanism of implementing the allocation            | 10                 |
| 7  |                        |                                                                          |                    |
| 8  | concealment            | sequence (eg, central telephone; sequentially                            |                    |
| 9  |                        |                                                                          |                    |
| 10 | mechanism              | numbered, opaque, sealed envelopes), describing                          |                    |
| 11 |                        |                                                                          |                    |
| 12 |                        | any steps to conceal the sequence until                                  |                    |
| 13 |                        |                                                                          |                    |
| 14 |                        | interventions are assigned                                               |                    |
| 15 |                        |                                                                          |                    |
| 16 |                        |                                                                          |                    |
| 17 |                        |                                                                          |                    |
| 18 | Allocation:            | <a href="#">#16c</a> Who will generate the allocation sequence, who      | 9-10               |
| 19 |                        |                                                                          |                    |
| 20 | implementation         | will enrol participants, and who will assign                             |                    |
| 21 |                        |                                                                          |                    |
| 22 |                        | participants to interventions                                            |                    |
| 23 |                        |                                                                          |                    |
| 24 |                        |                                                                          |                    |
| 25 | Blinding (masking)     | <a href="#">#17a</a> Who will be blinded after assignment to             | 10                 |
| 26 |                        |                                                                          |                    |
| 27 |                        | interventions (eg, trial participants, care providers,                   |                    |
| 28 |                        |                                                                          |                    |
| 29 |                        | outcome assessors, data analysts), and how                               |                    |
| 30 |                        |                                                                          |                    |
| 31 |                        |                                                                          |                    |
| 32 |                        |                                                                          |                    |
| 33 | Blinding (masking):    | <a href="#">#17b</a> If blinded, circumstances under which unblinding is | n/a – Participants |
| 34 |                        |                                                                          |                    |
| 35 | emergency              | permissible, and procedure for revealing a                               | will be unblinded  |
| 36 |                        |                                                                          |                    |
| 37 | unblinding             | participant's allocated intervention during the trial                    | after allocation   |
| 38 |                        |                                                                          |                    |
| 39 |                        |                                                                          |                    |
| 40 |                        |                                                                          |                    |
| 41 | <b>Methods: Data</b>   |                                                                          |                    |
| 42 |                        |                                                                          |                    |
| 43 | <b>collection,</b>     |                                                                          |                    |
| 44 |                        |                                                                          |                    |
| 45 | <b>management, and</b> |                                                                          |                    |
| 46 |                        |                                                                          |                    |
| 47 | <b>analysis</b>        |                                                                          |                    |
| 48 |                        |                                                                          |                    |
| 49 |                        |                                                                          |                    |
| 50 |                        |                                                                          |                    |
| 51 | Data collection plan   | <a href="#">#18a</a> Plans for assessment and collection of outcome,     | 13-16              |
| 52 |                        |                                                                          |                    |
| 53 |                        | baseline, and other trial data, including any related                    |                    |
| 54 |                        |                                                                          |                    |
| 55 |                        | processes to promote data quality (eg, duplicate                         |                    |
| 56 |                        |                                                                          |                    |
| 57 |                        | measurements, training of assessors) and a                               |                    |
| 58 |                        |                                                                          |                    |
| 59 |                        |                                                                          |                    |
| 60 |                        |                                                                          |                    |



|    |                                             |                                                        |       |
|----|---------------------------------------------|--------------------------------------------------------|-------|
| 1  |                                             | description of study instruments (eg,                  |       |
| 2  |                                             | questionnaires, laboratory tests) along with their     |       |
| 3  |                                             | reliability and validity, if known. Reference to       |       |
| 4  |                                             | where data collection forms can be found, if not in    |       |
| 5  |                                             | the protocol                                           |       |
| 6  |                                             |                                                        |       |
| 7  |                                             |                                                        |       |
| 8  |                                             |                                                        |       |
| 9  |                                             |                                                        |       |
| 10 |                                             |                                                        |       |
| 11 |                                             |                                                        |       |
| 12 |                                             |                                                        |       |
| 13 | Data collection plan: <a href="#">#18b</a>  | Plans to promote participant retention and             | 9-10  |
| 14 | retention                                   | complete follow-up, including list of any outcome      |       |
| 15 |                                             | data to be collected for participants who              |       |
| 16 |                                             | discontinue or deviate from intervention protocols     |       |
| 17 |                                             |                                                        |       |
| 18 |                                             |                                                        |       |
| 19 |                                             |                                                        |       |
| 20 |                                             |                                                        |       |
| 21 |                                             |                                                        |       |
| 22 | Data management <a href="#">#19</a>         | Plans for data entry, coding, security, and storage,   | 8,12  |
| 23 |                                             | including any related processes to promote data        |       |
| 24 |                                             | quality (eg, double data entry; range checks for       |       |
| 25 |                                             | data values). Reference to where details of data       |       |
| 26 |                                             | management procedures can be found, if not in          |       |
| 27 |                                             | the protocol                                           |       |
| 28 |                                             |                                                        |       |
| 29 |                                             |                                                        |       |
| 30 |                                             |                                                        |       |
| 31 |                                             |                                                        |       |
| 32 |                                             |                                                        |       |
| 33 |                                             |                                                        |       |
| 34 |                                             |                                                        |       |
| 35 |                                             |                                                        |       |
| 36 |                                             |                                                        |       |
| 37 | Statistics: outcomes <a href="#">#20a</a>   | Statistical methods for analysing primary and          | 17-18 |
| 38 |                                             | secondary outcomes. Reference to where other           |       |
| 39 |                                             | details of the statistical analysis plan can be found, |       |
| 40 |                                             | if not in the protocol                                 |       |
| 41 |                                             |                                                        |       |
| 42 |                                             |                                                        |       |
| 43 |                                             |                                                        |       |
| 44 |                                             |                                                        |       |
| 45 |                                             |                                                        |       |
| 46 |                                             |                                                        |       |
| 47 | Statistics: additional <a href="#">#20b</a> | Methods for any additional analyses (eg, subgroup      | 18-19 |
| 48 | analyses                                    | and adjusted analyses)                                 |       |
| 49 |                                             |                                                        |       |
| 50 |                                             |                                                        |       |
| 51 |                                             |                                                        |       |
| 52 | Statistics: analysis <a href="#">#20c</a>   | Definition of analysis population relating to protocol | 18    |
| 53 | population and                              | non-adherence (eg, as randomised analysis), and        |       |
| 54 | missing data                                | any statistical methods to handle missing data (eg,    |       |
| 55 |                                             |                                                        |       |
| 56 |                                             |                                                        |       |
| 57 |                                             |                                                        |       |
| 58 |                                             |                                                        |       |
| 59 |                                             |                                                        |       |
| 60 |                                             |                                                        |       |

multiple imputation)

## Methods: Monitoring

|                                      |                      |                                                                                                                                                                                                                                                                                                                                       |                           |
|--------------------------------------|----------------------|---------------------------------------------------------------------------------------------------------------------------------------------------------------------------------------------------------------------------------------------------------------------------------------------------------------------------------------|---------------------------|
| Data monitoring:<br>formal committee | <a href="#">#21a</a> | Composition of data monitoring committee (DMC); summary of its role and reporting structure; statement of whether it is independent from the sponsor and competing interests; and reference to where further details about its charter can be found, if not in the protocol. Alternatively, an explanation of why a DMC is not needed | n/a                       |
| Data monitoring:<br>interim analysis | <a href="#">#21b</a> | Description of any interim analyses and stopping guidelines, including who will have access to these interim results and make the final decision to terminate the trial                                                                                                                                                               | n/a – no interim analyses |
| Harms                                | <a href="#">#22</a>  | Plans for collecting, assessing, reporting, and managing solicited and spontaneously reported adverse events and other unintended effects of trial interventions or trial conduct                                                                                                                                                     | 15                        |
| Auditing                             | <a href="#">#23</a>  | Frequency and procedures for auditing trial conduct, if any, and whether the process will be independent from investigators and the sponsor                                                                                                                                                                                           | n/a                       |
| <b>Ethics and dissemination</b>      |                      |                                                                                                                                                                                                                                                                                                                                       |                           |
| Research ethics                      | <a href="#">#24</a>  | Plans for seeking research ethics committee /                                                                                                                                                                                                                                                                                         | 3                         |

|    |                    |                      |                                                        |     |
|----|--------------------|----------------------|--------------------------------------------------------|-----|
| 1  | approval           |                      | institutional review board (REC / IRB) approval        |     |
| 2  |                    |                      |                                                        |     |
| 3  | Protocol           | <a href="#">#25</a>  | Plans for communicating important protocol             | n/a |
| 4  |                    |                      |                                                        |     |
| 5  | amendments         |                      | modifications (eg, changes to eligibility criteria,    |     |
| 6  |                    |                      | outcomes, analyses) to relevant parties (eg,           |     |
| 7  |                    |                      | investigators, REC / IRBs, trial participants, trial   |     |
| 8  |                    |                      | registries, journals, regulators)                      |     |
| 9  |                    |                      |                                                        |     |
| 10 | Consent or assent  | <a href="#">#26a</a> | Who will obtain informed consent or assent from        | 8   |
| 11 |                    |                      | potential trial participants or authorised surrogates, |     |
| 12 |                    |                      | and how (see Item 32)                                  |     |
| 13 |                    |                      |                                                        |     |
| 14 | Consent or assent: | <a href="#">#26b</a> | Additional consent provisions for collection and       | n/a |
| 15 |                    |                      | use of participant data and biological specimens in    |     |
| 16 | ancillary studies  |                      | ancillary studies, if applicable                       |     |
| 17 |                    |                      |                                                        |     |
| 18 | Confidentiality    | <a href="#">#27</a>  | How personal information about potential and           | 7   |
| 19 |                    |                      | enrolled participants will be collected, shared, and   |     |
| 20 |                    |                      | maintained in order to protect confidentiality         |     |
| 21 |                    |                      | before, during, and after the trial                    |     |
| 22 |                    |                      |                                                        |     |
| 23 | Declaration of     | <a href="#">#28</a>  | Financial and other competing interests for            | 2   |
| 24 |                    |                      | principal investigators for the overall trial and each |     |
| 25 | interests          |                      | study site                                             |     |
| 26 |                    |                      |                                                        |     |
| 27 | Data access        | <a href="#">#29</a>  | Statement of who will have access to the final trial   | 20  |
| 28 |                    |                      | dataset, and disclosure of contractual agreements      |     |
| 29 |                    |                      | that limit such access for investigators               |     |
| 30 |                    |                      |                                                        |     |
| 31 | Ancillary and post | <a href="#">#30</a>  | Provisions, if any, for ancillary and post-trial care, | 12  |
| 32 |                    |                      |                                                        |     |

|    |                       |                      |                                                        |                  |
|----|-----------------------|----------------------|--------------------------------------------------------|------------------|
| 1  | trial care            |                      | and for compensation to those who suffer harm          |                  |
| 2  |                       |                      |                                                        |                  |
| 3  |                       |                      | from trial participation                               |                  |
| 4  |                       |                      |                                                        |                  |
| 5  |                       |                      |                                                        |                  |
| 6  | Dissemination         | <a href="#">#31a</a> | Plans for investigators and sponsor to                 | 3                |
| 7  |                       |                      |                                                        |                  |
| 8  | policy: trial results |                      | communicate trial results to participants,             |                  |
| 9  |                       |                      |                                                        |                  |
| 10 |                       |                      | healthcare professionals, the public, and other        |                  |
| 11 |                       |                      |                                                        |                  |
| 12 |                       |                      | relevant groups (eg, via publication, reporting in     |                  |
| 13 |                       |                      |                                                        |                  |
| 14 |                       |                      | results databases, or other data sharing               |                  |
| 15 |                       |                      |                                                        |                  |
| 16 |                       |                      | arrangements), including any publication               |                  |
| 17 |                       |                      |                                                        |                  |
| 18 |                       |                      | restrictions                                           |                  |
| 19 |                       |                      |                                                        |                  |
| 20 |                       |                      |                                                        |                  |
| 21 |                       |                      |                                                        |                  |
| 22 | Dissemination         | <a href="#">#31b</a> | Authorship eligibility guidelines and any intended     | 20               |
| 23 |                       |                      |                                                        |                  |
| 24 | policy: authorship    |                      | use of professional writers                            |                  |
| 25 |                       |                      |                                                        |                  |
| 26 |                       |                      |                                                        |                  |
| 27 |                       |                      |                                                        |                  |
| 28 | Dissemination         | <a href="#">#31c</a> | Plans, if any, for granting public access to the full  | n/a              |
| 29 |                       |                      |                                                        |                  |
| 30 | policy: reproducible  |                      | protocol, participant-level dataset, and statistical   |                  |
| 31 |                       |                      |                                                        |                  |
| 32 | research              |                      | code                                                   |                  |
| 33 |                       |                      |                                                        |                  |
| 34 |                       |                      |                                                        |                  |
| 35 | <b>Appendices</b>     |                      |                                                        |                  |
| 36 |                       |                      |                                                        |                  |
| 37 |                       |                      |                                                        |                  |
| 38 | Informed consent      | <a href="#">#32</a>  | Model consent form and other related                   | Materials are    |
| 39 |                       |                      |                                                        |                  |
| 40 | materials             |                      | documentation given to participants and                | available in     |
| 41 |                       |                      |                                                        |                  |
| 42 |                       |                      | authorised surrogates                                  | German only but  |
| 43 |                       |                      |                                                        |                  |
| 44 |                       |                      |                                                        | can be submitted |
| 45 |                       |                      |                                                        |                  |
| 46 |                       |                      |                                                        |                  |
| 47 |                       |                      |                                                        | on request       |
| 48 |                       |                      |                                                        |                  |
| 49 |                       |                      |                                                        |                  |
| 50 |                       |                      |                                                        |                  |
| 51 | Biological            | <a href="#">#33</a>  | Plans for collection, laboratory evaluation, and       | n/a              |
| 52 |                       |                      |                                                        |                  |
| 53 | specimens             |                      | storage of biological specimens for genetic or         |                  |
| 54 |                       |                      |                                                        |                  |
| 55 |                       |                      | molecular analysis in the current trial and for future |                  |
| 56 |                       |                      |                                                        |                  |
| 57 |                       |                      | use in ancillary studies, if applicable                |                  |
| 58 |                       |                      |                                                        |                  |
| 59 |                       |                      |                                                        |                  |
| 60 |                       |                      |                                                        |                  |

1 None The SPIRIT Explanation and Elaboration paper is distributed under the terms of the Creative  
2  
3 Commons Attribution License CC-BY-NC. This checklist can be completed online using  
4  
5 <https://www.goodreports.org/>, a tool made by the [EQUATOR Network](#) in collaboration with  
6  
7 [Penelope.ai](#)  
8  
9  
10  
11  
12  
13  
14  
15  
16  
17  
18  
19  
20  
21  
22  
23  
24  
25  
26  
27  
28  
29  
30  
31  
32  
33  
34  
35  
36  
37  
38  
39  
40  
41  
42  
43  
44  
45  
46  
47  
48  
49  
50  
51  
52  
53  
54  
55  
56  
57  
58  
59  
60
